# Supplementary material
Source: ML conference proceedings conference paper supplement (https://openreview.net/forum?id=loVvFhfsDf)
Supplement: supplementary_material [file Neurips2025_lowrank.pdf › Nips_supplement_final/Neurips2025_lowrank.pdf]

---

# Shift Before You Learn: Enabling Low-Rank Representations in Reinforcement Learning

---

Anonymous Author(s)

Affiliation

Address

email

## Abstract

1 Low-rank structure is a common implicit assumption in many modern reinforcement  
2 learning (RL) algorithms. For instance, reward-free and goal-conditioned  
3 RL methods often presume that the successor measure admits a low-rank representation. In this work, we challenge this assumption by first remarking that the  
4 successor measure itself is not low-rank. Instead, we demonstrate that a low-rank  
5 structure naturally emerges in the shifted successor measure, which captures the  
6 system dynamics after bypassing a few initial transitions. We provide finite-sample  
7 performance guarantees for the entry-wise estimation of a low-rank approximation  
8 of the shifted successor measure from sampled entries. Our analysis reveals that  
9 both the approximation and estimation errors are primarily governed by the so-called  
10 spectral recoverability of the corresponding matrix. To bound this parameter,  
11 we derive a new class of functional inequalities for Markov chains that we call  
12 Type II Poincaré inequalities and from which we can quantify the amount of shift  
13 needed for effective low-rank approximation and estimation. This analysis shows  
14 in particular that the required shift depends on decay of the high-order singular  
15 values of the shifted successor measure and is hence typically small in practice.  
16 Additionally, we establish a connection between the necessary shift and the local  
17 mixing properties of the underlying dynamical system, which provides a natural  
18 way of selecting the shift. Finally, we validate our theoretical findings with experiments,  
19 and demonstrate that shifting the successor measure indeed leads to  
20 improved performance in goal-conditioned RL.  
21

## 22 1 Introduction

23 In reinforcement learning (RL) the complexity of underlying environment dynamics makes it crucial  
24 to leverage structural assumptions in order to achieve statistical efficiency. A widely adopted approach  
25 involves assuming that key functionals can be represented using low-dimensional feature vectors.  
26 This assumption effectively imposes a low-rank structure on one of the matrices associated with  
27 various RL components, including the Q-function (51; 49; 54), the transition kernel (2), the graph  
28 Laplacian (40; 41), and successor representations (14; 52; 5). Some works even propose learning  
29 universal low-dimensional representations that generalize across tasks, such as in the Forward-  
30 Backward model (55; 56) or in goal-conditioned RL frameworks (3; 19). While these representations  
31 have shown empirical success and have motivated initial theoretical studies on their statistical  
32 benefits, fundamental questions remain open: *Why should such low-rank structures emerge in Markov*  
33 *Decision Processes (MDPs)? And under what conditions do they yield accurate and easy-to-learn*  
34 *representations?*

35 To address these questions, we examine how the long-term dynamics of an MDP naturally  
36 give rise to global structure that can be captured effectively through low-rank approximations.

In particular, we demonstrate that a simple temporal shift of the successor measure can substantially improve its alignment with low-rank structure. This shift reweights transitions to emphasize long-term behavior, filtering out short-term noise and amplifying the structural signal present in the dynamics. Crucially, its effectiveness hinges on the mixing properties of the underlying Markov chain, which determine how rapidly the process forgets its initial conditions and reveals coherent global patterns. Our main contributions are as follows.

(a) We introduce the notion of spectral recoverability to quantify the approximation error incurred by low-rank representations. We show that standard successor measures lack spectral recoverability, motivating the use of shifted successor measures which discard initial transitions and emphasize long-term dynamics. We prove that sufficiently large shifts guarantee spectral recoverability.

(b) We provide finite-sample performance guarantees for the entry-wise estimation of a low-rank approximation of the shifted successor measure from sampled entries. Our analysis reveals that the estimation error is also governed by the spectral recoverability of the shifted successor measure.

(c) To characterize when spectral recoverability holds, we introduce a novel class of functional inequalities for Markov chains, which we call Type II Poincaré inequalities. These inequalities allow us to quantify the amount of shift required for effective low-rank approximation and estimation. Moreover, we relate the required shift to the local mixing properties of the underlying dynamical system. These properties measure the extent to which the state space admits a decomposition into subsets within which the local dynamics mix rapidly.

(d) Finally, we validate our theoretical insights through experiments on learning the shifted universal successor measure in goal-conditioned RL. This representation enables the simultaneous learning of optimal policies for reaching a variety of goals. A representative result is shown in Figure 1.

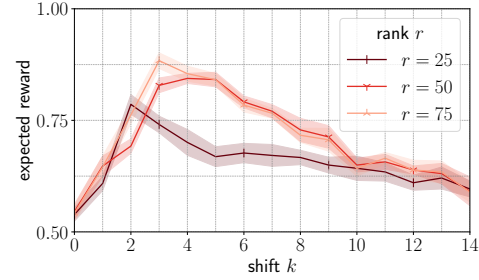

Figure 1: The discrete Medium PointMaze environment (see Section 6). Performance of goal-conditioned RL based on the rank- $r$  approximation of the  $k$ -shifted successor measure. Peak performance occurs at a non-zero shift, suggesting that shifting the successor measure can improve policy learning under low-rank constraints.

## 2 Related Work

**Low-rank approximations in RL.** Low-rank models are ubiquitous in reinforcement learning. These models rely on low-rank approximations of certain matrices: most notably the Laplacian (40; 41; 36; 57; 30; 23) and the successor representation (14; 52; 31; 37; 35; 55; 56). While these models are empirically effective and supported by intuitive heuristics based on spectral properties (see e.g. (32)), they often lack rigorous theoretical justification. Our work aims to address this gap by establishing a connection between low-rank structures and the mixing behavior of the underlying dynamics.

**Sample complexity bounds.** Numerous studies have established performance guarantees for estimating low-rank structures in reinforcement learning (RL). Several approaches draw inspiration from matrix completion techniques and have been applied, for example, to the estimation of the Q-function (51; 49; 58; 54). Our work is closer to the low-rank Markov Decision Process (MDP) framework explored in (2; 59; 60; 53), where the transition kernel is modeled as a bilinear factorization of the form  $P(s, a, s') = \psi(s, a)^\top \phi(s')$ . A special case arises when the factors are constrained to be non-negative, yielding models such as (soft) state aggregation and block MDPs (17; 50; 59; 26). To the best of our knowledge, we are the first to analyze the sample complexity of estimating successor measures. Importantly, since successor representations are typically full-rank, imposing a strict low-rank assumption would be inappropriate. Instead, our analysis avoids explicit structural assumptions and allows structure to emerge organically from the mixing properties of the underlying dynamics.

**Mixing phenomena.** To bridge matrix estimation and dynamical behavior, we introduce spectral recoverability, a parameter that quantifies both the SVD truncation error and the difficulty of recov-

erating matrix entries from partial observations. Our approach is inspired by (10), who established minimax bounds for matrix completion under bounded nuclear norm. In contrast, we focus on entrywise estimation, which requires consideration of singular vectors. Spectral recoverability thus blends classical notions of coherence and nuclear norm, enabling entrywise error analysis via the leave-one-out technique of (1). On the other hand, it connects to classical mixing measures in Markov chain theory and can thus be bounded by revisiting classical tools such as functional inequalities (16) and spectral analysis (20). However, unlike traditional approaches that focus on global mixing times, our focus is on statistical estimation for which local and thereby weaker notions of mixing may be suffice. This geometric intuition shares conceptual similarities with the works of (39; 27) on decomposable Markov chains and of (33) on spectral partitioning of graphs via eigenvectors of the adjacency matrix, which thus also connects with the block Markov chains mentioned previously.

### 3 Preliminaries

#### 3.1 MDPs and shifted successor measures

Consider a Markov Decision Process (MDP) with finite state space  $\mathcal{S}$  and action space  $\mathcal{A} := \bigcup_{s \in \mathcal{S}} \mathcal{A}_s$ , where  $\mathcal{A}_s$  denotes the set of actions available in state  $s$ . Define the set of state-action pairs as  $\mathcal{X} := \bigcup_{s \in \mathcal{S}} \{s\} \times \mathcal{A}_s$ , and let  $n$  denote its cardinality. We write  $x = (s, a)$  to denote a generic element of  $\mathcal{X}$ . The dynamics of the MDP are governed by a transition matrix  $P \in \mathbb{R}^{\mathcal{X} \times \mathcal{S}}$ , where  $P(s, a, s')$  represents the probability of transitioning to state  $s'$  when taking action  $a$  in state  $s$ . A policy is defined as a stochastic matrix  $\pi \in \mathbb{R}^{\mathcal{S} \times \mathcal{A}}$ , where  $\pi(s, a)$  denotes the probability of selecting action  $a$  in state  $s$ . The policy  $\pi$  induces a Markov chain over  $\mathcal{X}$  with transition matrix  $P_\pi$ , defined as:  $P_\pi((s, a), (s', a')) = P(s, a, s')\pi(s', a')$ . The MDP is completed by specifying a reward function  $R : \mathcal{X} \rightarrow \mathbb{R}$ . When the state-action pair  $(s, a)$  is visited at time step  $t \geq 0$ , a reward of  $\gamma^t R(s, a)$  is received, where  $\gamma \in (0, 1)$  is the discount factor. The performance of a policy  $\pi$  is characterized by its Q-function:  $Q^{(R, \pi)}(s, a) = \mathbb{E} \left[ \sum_{t \geq 0} \gamma^t R(s_t^\pi, a_t^\pi) \mid (s_0^\pi, a_0^\pi) = (s, a) \right]$  where  $(s_t^\pi, a_t^\pi)$  is the state-action pair visited under  $\pi$  at time  $t$ , or through its value function  $V^{(R, \pi)}(s) := \sum_{a \in \mathcal{A}_s} \pi(s, a) Q^{(R, \pi)}(s, a)$ .

The Q-function can be expressed as a matrix-vector product. To make this explicit, define the successor measure as  $M_\pi := (I - \gamma P_\pi)^{-1} \in \mathbb{R}^{\mathcal{X} \times \mathcal{X}}$ . Then  $Q^{(R, \pi)}(s, a) = \sum_{t \geq 0} \gamma^t P_\pi^t R(s, a) = M_\pi R(s, a)$ , where we use matrix product notation:  $M_\pi R(s, a) := \sum_{(s', a') \in \mathcal{X}} M_\pi((s, a), (s', a')) R(s', a')$ . This formulation separates the dynamics from the rewards, showing that evaluating a policy for any reward function reduces to computing  $M_\pi$  (14; 56). The problem of estimating the successor measure is referred to as *reward-free policy evaluation*. For this problem, we would like to obtain guarantees w.r.t. to the  $\|\cdot\|_{\infty, \infty}$  norm defined as  $\|A\|_{\infty, \infty} := \sup_{f \in \mathbb{R}^{\mathcal{X}}: \|f\|_\infty = 1} \|Af\|_\infty$ . Indeed, suppose that we have an estimate  $\widehat{M}_\pi$  of  $M_\pi$ , and hence an estimate  $\widehat{Q}^{(R, \pi)} = \widehat{M}_\pi R$  of the Q-function. This in turn allows us to improve the policy by acting greedily with respect to  $\widehat{Q}^{(R, \pi)}$ . However, for this procedure to be reliable, we require entry-wise control over the error in  $\widehat{Q}^{(R, \pi)}$ , which can be guaranteed by bounding the error in  $\widehat{M}_\pi$  in the  $\|\cdot\|_{\infty, \infty}$  norm:  $\|\widehat{Q}^{(R, \pi)} - Q^{(R, \pi)}\|_\infty = \|\widehat{M}_\pi R - M_\pi R\|_\infty \leq \|\widehat{M}_\pi - M_\pi\|_{\infty, \infty} \|R\|_\infty$ . As we show later in the paper, obtaining accurate estimates of  $M_\pi$  can be statistically challenging. The objective of this paper is to explain why shifting the successor measure may address this challenge.

**Definition 1** ( $k$ -shifted successor measure). Let  $k \geq 0$ . The  $k$ -shifted successor measure is defined as  $M_{\pi, k} := P_\pi^k (I - \gamma P_\pi)^{-1}$ .

The  $k$ -shifted successor measure  $M_{\pi, k}$  captures the dynamics of policy  $\pi$  starting from time step  $k$  onward. It allows us to quantify the cumulative discounted reward collected under  $\pi$  after the first  $k$  steps. For any reward function  $R$ , it satisfies:  $M_{\pi, k} R(s, a) = \sum_{t \geq 0} \gamma^t P_\pi^{t+k} R(s, a)$ .

#### 3.2 Measure-induced norms and SVD

To analyze the accuracy of estimators of the (shifted) successor measure w.r.t. to the  $\|\cdot\|_{\infty, \infty}$  norm and make the link with mixing phenomena, we will use measure-induced norms and SVD (refer to Appendix A.1 for a detailed description). Consider a probability measure  $\nu$  on  $\mathcal{X}$  whose support is  $\mathcal{X}^1$ .

<sup>1</sup>We discuss extensions where this is not the case in Appendix C

For  $f, g \in \mathbb{R}^{\mathcal{X}}$ , define the  $\nu$ -scalar product as  $\langle f, g \rangle_\nu := \sum_{x \in \mathcal{X}} \nu(x) f(x) g(x)$ , so that  $(\mathbb{R}^{\mathcal{X}}, \langle \cdot, \cdot \rangle_\nu)$  is a Hilbert space. We define for all  $f \in \mathbb{R}^{\mathcal{X}}$ ,  $M \in \mathbb{R}^{\mathcal{X} \times \mathcal{X}}$  the  $\nu$ -induced norms as: for any  $p, q \in [1, \infty]$ ,

$$\|f\|_{\ell^p(\nu)} := \begin{cases} (\sum_{x \in \mathcal{X}} \nu(x) |f(x)|^p)^{1/p} & \text{if } p < \infty \\ \max_{x \in \mathcal{X}} |f(x)| & \text{if } p = \infty \end{cases}, \quad \|M\|_{\ell^p(\nu), \ell^q(\mu)} := \sup_{f \in \mathbb{R}^{\mathcal{X}}: f \neq 0} \frac{\|Mf\|_{\ell^q(\mu)}}{\|f\|_{\ell^p(\nu)}}.$$

For simplicity, we keep the measure implicit and use the notation  $\|f\|_p = \|f\|_{\ell^p(\nu)}$  and  $\|M\|_{p,q} = \|M\|_{\ell^p(\nu), \ell^q(\mu)}$ . Note that  $\|\cdot\|_\infty$  does not depend on  $\nu$ . We will be mostly interested in the spectral norm  $\|M\|_{2,2}$  and the two-infinity norm  $\|M\|_{2,\infty}$ , as we always have  $\|\cdot\|_{\infty,\infty} \leq \|\cdot\|_{2,\infty}$ . Using  $\nu$ , we can define the notions of adjoint of a vector  $f$  and of a matrix  $M$ :  $f^\dagger(x) = \nu(x)f(x)$  and  $M^\dagger(x, y) = \frac{\nu(x)M(y, x)}{\nu(y)}$ . This allows us to revise the notion of singular value decomposition by replacing the usual transpose operator with the adjoint.

**Definition 2 ( $\nu$ -SVD).** The  $\nu$ -SVD of the matrix  $M \in \mathbb{R}^{n \times n}$  takes the form  $M = U \Sigma V^\dagger$  where  $\Sigma = \text{Diag}((\sigma_i)_{i=1}^n)$  is a diagonal matrix made of non-negative values that we always assume to be in non-increasing order:  $\sigma_1 \geq \sigma_2 \geq \dots$ , while  $U, V \in \mathbb{R}^{n \times n}$  are unitary in the sense  $U^\dagger U = U U^\dagger = I$  and  $V^\dagger V = V V^\dagger = I$ . The  $\nu$ -SVD can be expressed as  $M = \sum_{i=1}^n \sigma_i \psi_i \phi_i^\dagger$ , where the left and right singular vectors  $(\psi_i)_i, (\phi_i)_i$  form orthonormal bases (e.g.  $\psi_i^\dagger \psi_i = 1$  and  $\psi_i^\dagger \psi_j = 0$  for  $i \neq j$ ). The entries of  $U, V$  are then  $U(x, i) = \sqrt{\nu(i)} \psi_i(x)$ ,  $V(x, i) = \sqrt{\nu(i)} \phi_i(x)$ .

Given  $r \geq 0$ , we write  $[M]_r = U_r \Sigma_r V_r^\dagger$  for the  $\nu$ -SVD truncated to rank  $r$  and  $[M]_{>r} = M - [M]_r$ . We finally note that the usual SVD corresponds to the case where  $\mu$  is uniform, up to a normalizing factor  $n$ . In what follows, to simplify, the  $\nu$ -SVD is referred to as the SVD.

### 3.3 Spectral recoverability

Our goal is to estimate the (shifted) successor measure with entry-wise guarantees by approximating the corresponding matrix via an estimate of its truncated SVD. Truncated SVD is a well-established technique for matrix approximation when considering the Frobenius or nuclear norm. From the Eckart–Young–Mirsky theorem, for a matrix  $M \in \mathbb{R}^{n \times n}$ , its rank- $r$  truncated SVD,  $[M]_r$ , provides the optimal rank- $r$  approximation with respect to the Frobenius norm. The approximation error is entirely determined by the spectral tail:  $\|[M]_{>r}\|_F^2 = \sum_{i=r+1}^n \sigma_i^2$ . When estimating the matrix from samples of its entries, the entry-wise error often depends on the coherence of the top  $r$  singular vectors. Coherence measures how concentrated or spread out the singular vectors are with respect to the standard basis. High coherence implies that a few entries dominate, making estimation from partial observations harder, while low coherence suggests that all entries are comparably informative. For detailed discussions, see, e.g., (7; 47; 42). In our setting, we adopt a similar notion of coherence. For the top  $r$  left singular vectors  $(\psi_i)_{i=1}^r$  of  $M$ , we define the coherence as:  $c((\psi_i)_{i=1}^r) := \frac{1}{r} \|U_r\|_{2,\infty}^2 = \frac{1}{r} \sum_{i=1}^r \psi_i(x)^2$ .

When we seek guarantees in entry-wise norms such as  $\|\cdot\|_{2,\infty}$  or  $\|\cdot\|_{\infty,\infty}$ , it is not clear whether the truncated SVD  $[M]_r$  still yields a meaningful approximation of  $M$ . It is also not obvious what quantity governs the estimation error when attempting to recover  $[M]_r$  from sampled entries. To address these questions, we introduce the concept of spectral recoverability, which serves as a suitable quantity for controlling the approximation and estimation errors when the  $\|\cdot\|_{2,\infty}$  or  $\|\cdot\|_{\infty,\infty}$  norms are considered.

**Definition 3 (Spectral recoverability).** Let  $M \in \mathbb{R}^{n \times n}$  and let  $M = \sum_{i=1}^n \sigma_i \psi_i \phi_i^\dagger$  be its SVD. The spectral recoverability of  $M$  is  $\xi(M) := \max_x \sum_i \sigma_i \psi_i(x)^2$ .

The spectral recoverability of a matrix  $M$  can be interpreted as a nuclear norm weighted by the left singular vectors of  $M$ , and it quantifies both the low-rank structure and coherence of the matrix. As stated in the following lemma, proved in Appendix A, the low-rank approximation error of  $M$  in the  $\|\cdot\|_{2,\infty}$  or  $\|\cdot\|_{\infty,\infty}$  norm is controlled by  $\xi(M)$ .

**Lemma 1.** Let  $M \in \mathbb{R}^{n \times n}$ . We have: for any  $1 \leq r < n$ ,  $\|M - [M]_r\|_{2,\infty} \leq \sqrt{\sigma_{r+1} \xi(M)}$ .

This lemma serves as an analogue, under the  $\|\cdot\|_{2,\infty}$  norm, of the "key lemma" from (10) (specifically, Lemma 3.5), which underpins a universal thresholding SVD procedure in the Frobenius norm setting.

In our context, the lemma implies that  $\|M - [M]_r\|_{2,\infty} \leq \epsilon$  for the largest rank  $r$  such that  $\sigma_r \geq \epsilon^2/\xi(M)$ . This provides a principled criterion for selecting the rank  $r$  in a truncated SVD when targeting an accuracy level  $\epsilon$  in the  $\|\cdot\|_{2,\infty}$  norm. Additionally, for the problem of estimating the matrix from sample entries with  $\|\cdot\|_{2,\infty}$  guarantees, we derive a sample complexity lower bound scaling as  $\xi(M)$ , see Appendix B.

We conclude with a few remarks.  $\xi(M)$  and  $\|M\|_{2,\infty}$  are closely related as  $\|M\|_{2,\infty}^2 = \max_x \sum_i \sigma_i^2 \psi_i(x)^2 \leq \sigma_1 \xi(M)$ . When  $M$  has rank  $r$ , the spectral recoverability satisfies:  $\xi(M) \leq \sigma_1 \|U_r\|_{2,\infty}^2 = r \sigma_1 c((\psi_i)_{i=1}^r)$  which connects  $\xi(M)$  to classical notions of coherence. Finally, as shown in Fig. 2, the low-rank approximation error of the shifted successor measure improves when the shift  $k$  increases (see Section 5 for theoretical justifications).

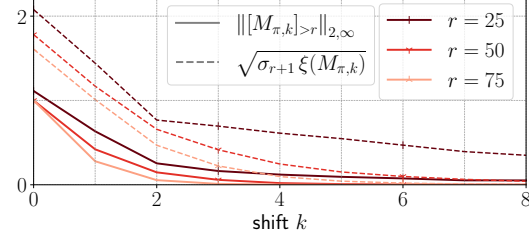

Figure 2: Approximation error as a function of the shift parameter  $k$  and rank  $r$ . Theoretical upper bound serves as a first-order proxy for entry-wise error. We use the standard  $\|\cdot\|_{2 \rightarrow \infty}$  norm, which matches (up to a  $\sqrt{n}$  factor) the variant from Section 3.2 under the uniform measure  $\nu$ . See Section 6 for experimental details.

## 4 Estimation of the Shifted Successor Measure

We assume access to a dataset of transitions  $(s, a, s')$  collected offline. Let  $Z_{s,a}$  denote the number of independent transitions observed from the state-action pair  $(s, a)$ . Our analysis provides estimation error bounds conditional on these counts, so we may treat the  $Z_{s,a}$  as deterministic. Using the data, we form the empirical estimator  $\hat{P}(s, a, s') = Y_{s,a,s'}/Z_{s,a}$ , and given a policy  $\pi$  we can then also form  $\hat{P}_\pi(s, a, s') = \hat{P}(s, a, s')\pi(s', a')$  as the empirical estimator of  $P_\pi$ . We can then build a simple estimator of the  $k$ -shifted successor measure  $M_{\pi,k} = P_\pi^k(I - \gamma P_\pi)^{-1}$  by taking  $\widehat{M}_{\pi,k} = \hat{P}_\pi^k(I - \gamma \hat{P}_\pi)^{-1}$ .

Our final estimator of  $M_{\pi,k}$  is obtained by computing the truncated  $\nu$ -SVD  $[\widehat{M}_{\pi,k}]_r$  of  $\widehat{M}_{\pi,k}$ . We derive guarantees for this estimator under any probability measure  $\nu$  of the following form. Let  $\mu$  be a probability measure on  $\mathcal{S}$ ; we define  $\nu$  such that  $\nu(s, a) = \mu(s)\pi(s, a)$  for all  $(s, a)$ . In the following theorem,  $\sigma_i$  denotes the  $i$ -th singular value of  $\widehat{M}_{\pi,k}$  in the  $\nu$ -SVD, and  $\nu_{\pi,\text{inv}}$  denotes the invariant measure of the Markov chain  $P_\pi$ . We also define for  $\delta \in (0, 1)$ :

$$\Gamma_\delta := \max(k, (1-\gamma)^{-1})^2 \sqrt{\max_{(s,a),(s',a') \in \mathcal{X}} \frac{\nu(s,a)}{Z_{s,a}\nu(s',a')} \log(rn/\delta)}, \quad (1)$$

$$\mathcal{E}_{\text{estim}} := \frac{\sigma_1 \max(\|M_{\pi,k}\|_{2,\infty}, \|M_{\pi,k}^\dagger\|_{2,\infty})}{\sigma_r(\sigma_r - \sigma_{r+1})} \left\| \frac{d\nu}{d\nu_{\pi,\text{inv}}} \right\|_\infty \left\| \frac{d\nu_{\pi,\text{inv}}}{d\nu} \right\|_\infty \Gamma_\delta, \quad (2)$$

$$\mathcal{E}_{\text{approx}} := \sqrt{\sigma_{r+1} \xi(M_{\pi,k})}. \quad (3)$$

**Theorem 1.** *There is a universal constant  $C > 0$  such that for any  $k \geq 0$ , any probability measure  $\nu$  on  $\mathcal{X}$ , any  $1 \leq r < n$ , and all  $\delta \in (0, 1)$ , we have, if  $\Gamma_\delta \leq 1$ , with probability at least  $1 - \delta$ ,*

$$\|[\widehat{M}_{\pi,k}]_r - M_{\pi,k}\|_{2,\infty} \leq C\mathcal{E}_{\text{estim}} + \mathcal{E}_{\text{approx}}. \quad (4)$$

In the proof presented in Appendix C, we show that  $C\mathcal{E}_{\text{estim}}$  and  $\mathcal{E}_{\text{approx}}$  are upper bounds on the estimation and approximation errors, respectively:  $\|[\widehat{M}_{\pi,k}]_r - [M_{\pi,k}]_r\|_{2,\infty} \leq C\mathcal{E}_{\text{estim}}$  and  $\|[M_{\pi,k}]_r - M_{\pi,k}\|_{2,\infty} \leq \mathcal{E}_{\text{approx}}$ .

We discuss the terms involved in the estimation error upper bound below.

(a) The term  $A := \frac{\sigma_1 \max(\|M_{\pi,k}\|_{2,\infty}, \|M_{\pi,k}^\dagger\|_{2,\infty})}{\sigma_r(\sigma_r - \sigma_{r+1})}$  comes from the so-called leave-one-out analysis, a step in the proof that aims at going from error bounds in spectral norm to error bounds in  $\|\cdot\|_{2,\infty}$ . The numerator can be controlled via the spectral recoverability of  $M_{\pi,k}$  since  $\|M_{\pi,k}\|_{2,\infty} \leq \sigma_1 \xi(M_{\pi,k})$ .

For  $A$  to be controlled, we hence need to control the spectral recoverability of  $M_{\pi,k}$ , to have  $r$  such that  $\sigma_1/\sigma_r$  is bounded and the gap  $\sigma_r - \sigma_{r+1}$  is significant. In Appendix C, we discuss how to control  $\sigma_r - \sigma_{r+1}$  in case of bounded spectral recoverability.

(b) The term  $B = d(\nu, \nu_{\pi,\text{inv}}) := \left\| \frac{d\nu}{d\nu_{\pi,\text{inv}}} \right\|_{\infty} \left\| \frac{d\nu_{\pi,\text{inv}}}{d\nu} \right\|_{\infty}$  involves the Radon-Nikodym derivative of  $\nu$  w.r.t.  $\nu_{\pi,\text{inv}}$  and  $\nu_{\pi,\text{inv}}$  w.r.t.  $\nu$ . It captures the discrepancy between  $\nu$ , used to compute the SVD, and the invariant measure  $\nu_{\pi,\text{inv}}$  of the Markov chain under policy  $\pi$ . The choice of  $\nu$  is under the control of the practitioner. In practice, it may correspond to the empirical distribution of the dataset or be chosen arbitrarily, for example, as the uniform distribution, in which case the SVD reduces to the standard SVD. On the other hand, the invariant distribution  $\nu_{\pi,\text{inv}}$  is more naturally aligned with the dynamics and yields the tightest possible bound. Setting  $\nu = \nu_{\pi,\text{inv}}$  eliminates the multiplicative factor  $B$ , resulting in the best-case guarantee. However, estimating  $\nu_{\pi,\text{inv}}$  exactly may not necessarily be feasible. Theorem 1 accommodates potential mismatch between  $\nu$  and  $\nu_{\pi,\text{inv}}$ , showing that it is sufficient for  $\nu$  to approximate the invariant measure up to a constant factor.

(c) The term  $C := \max(k, (1-\gamma)^{-1})^2$  comes from extending the concentration results in spectral norm of  $\widehat{P}$  to the shifted successor measure  $\widehat{M}_{\pi,k}$ . The form of this term critically relies on a comparison of  $\nu$  with the invariant measure, allowing us to exploit contraction properties and avoid exponential dependence in  $k$  or  $(1-\gamma)^{-1}$ .

(d) The term  $D := \max_{(s,a),(s',a') \in \mathcal{X}} \frac{\nu(s,a)}{Z_{s,a}\nu(s',a')} \log(rn/\delta)$  can eventually be traced back to the concentration in spectral norm of the empirical estimator  $\widehat{P}$ , and is the only term that depends on the number of observations: if we want  $\xi$  small this factor show how large each  $Z_{s,a}$  should. Because of the ratio  $\frac{\nu(s,a)}{\nu(s',a')}$ , the result applies primarily to case where  $\nu$  exhibits some kind of homogeneity.

**Corollary 1.** Assume that  $\xi(M_{\pi,k})$ ,  $\sigma_1/\sigma_r$ ,  $\max_{(s,a),(s',a') \in \mathcal{X}} \frac{\nu(s,a)}{\nu(s',a')}$  and  $d(\nu, \nu_{\pi,\text{inv}})$  are  $\mathcal{O}(1)$ , and that  $\sigma_r - \sigma_{r+1} = \Omega(1)$ . Then a sufficient condition for  $\|\widehat{M}_{\pi,k}\|_{2,\infty} - \|M_{\pi,k}\|_{2,\infty} = \mathcal{O}(\varepsilon)$  with probability at least  $1 - \delta$  is that the number of observations per state-action pair satisfies  $\min_{(s,a)} Z_{s,a} = \Theta(\frac{\log(nr/\delta)}{\varepsilon^2})$ .

From the above result, we deduce that under the structural assumptions made on  $M_{\pi,k}$ , the sample complexity to obtain an estimation error scaling as  $\varepsilon$  in the  $\|\cdot\|_{2,\infty}$  norm scales as  $n/\varepsilon^2$  up to the logarithmic term. Without structure, this sample complexity would necessarily scale as  $n^2/\varepsilon^2$ . We provide a more detailed discussion about these assumptions, including the role of the measure  $\nu$ , the rank, etc. in Appendix C.

## 5 When Low-rank Structure Emerges: Local Mixing Phenomena

There is no reason to expect the transition kernel  $P$  (or  $P_{\pi}$ ) to exhibit a low-rank structure, and in view of the following proposition (proved in Appendix G), the same observation holds for the successor measure.

**Proposition 1.** Let  $P_{\pi} \in \mathbb{R}^{n \times n}$ . For all  $\gamma \in (0, 1)$ ,  $k \geq 0$ ,  $i \in [n]$ ,  $\frac{\sigma_i(P_{\pi}^k)}{1+\gamma} \leq \sigma_i(M_{\pi,k}) \leq \frac{\sigma_i(P_{\pi}^k)}{1-\gamma}$ . Consequently  $\|M_{\pi}\|_{2,\infty} \geq \frac{\sqrt{n}}{1+\gamma}$  and  $\|M_{\pi,k}\|_{2,\infty} \geq \frac{\|P_{\pi}^k\|_F}{1+\gamma}$ .

However, the situation changes when we consider powers of the transition matrix: for some  $k > 1$ , the matrix  $P_{\pi}^k$  may become approximately low-rank. Specifically, if the Markov chain is ergodic, then  $P_{\pi}^k$  approaches a rank-1 matrix as  $k$  nears the mixing time. This observation suggests that the  $k$ -shifted successor measure  $M_{\pi,k}$  may also exhibit low-rank structure for high values of  $k$ . However, the mixing time can be prohibitively long, and applying such a large shift would be impractical. This raises a natural question: can a low-rank structure emerge at smaller values of  $k$ , before the chain has fully mixed? We address this question by developing theoretical tools to determine from which value of  $k$  the  $\|\cdot\|_{2,\infty}$  norm and the spectral recoverability of  $M_{\pi,k}$  become bounded. We relate this threshold to a concept we refer to as *local mixing* of the underlying Markov chain.

For notational convenience, throughout this section, we write  $P$  (resp.  $M_k$ ) in place of  $P_{\pi}$  (resp.  $M_{\pi,k}$ ). We also define  $\nu_{\min} := \min_{x \in \mathcal{X}} \nu(x) > 0$ . We observe that  $\|M_k\|_{2,\infty} \leq \|M\|_{\infty,\infty} \|P^k\|_{2,\infty} =$

(1 -  $\gamma$ )<sup>-1</sup>  $\|P^k\|_{2,\infty}$ , and hence in what follows we restrict our attention to upper bounding  $\|P^k\|_{2,\infty}$ . We discuss how to perform a similar analysis for  $\|M_k^\dagger\|_{2,\infty}$  and  $\xi(M_k)$  in Appendix G.

## 5.1 Local mixing estimates via Poincaré inequalities

To estimate the smallest value of  $k$  for which  $\|P^k\|_{2,\infty}$  becomes bounded, we develop and leverage functional inequalities inspired by those used to analyze the mixing times of Markov chains (see, e.g., (43; 48)). Appendix G provides a detailed introduction to these techniques, as well as the proofs of all the results of this section. We introduce the Dirichlet form  $\mathcal{E}_{PP^\dagger}(f, g) = \langle (I - PP^\dagger)f, g \rangle_\nu$  for all  $f, g \in \mathbb{R}^n$ . The next theorem shows that deriving functional inequalities on the Dirichlet form allows us to control  $\|P^k\|_{2,\infty}$ .

**Theorem 2.** Suppose there exist  $\lambda, C \geq 0$  such that  $P$  satisfies the type II<sup>2</sup> Poincaré inequality

$$\forall f \in \mathbb{R}^n : \quad \lambda \|f\|_2^2 \leq \mathcal{E}_{PP^\dagger}(f, f) + C\lambda \|f\|_1^2. \quad (5)$$

Then for all  $k \geq 0$ :  $\|P^k\|_{2,\infty}^2 \leq (\nu_{\min}^{-1} - C)(1 - \lambda)^k + C$ .

When  $\nu$  is the invariant measure of  $P$ , Courant-Fisher theorem (Theorem 3.1.2 in (25)) yields (5) with  $\lambda = 1 - \sigma_2(P)^2$  and  $C = 1$ , which in turn leads to a bound on the mixing time that depends on the singular gap of  $P$ . However, as we show below, type II inequalities can also be derived using higher-order singular values of  $P$ . This leads to significantly faster exponential decay rates for  $\|P^k\|_{2,\infty}^2$ , albeit at the cost of a larger limiting constant  $C$ . Interestingly, our analysis reveals a connection between this limiting constant and the coherence of the singular vectors.

**Theorem 3.** Suppose the underlying measure  $\nu$  is the invariant measure of  $P$ . Let  $P = U\Sigma V^\dagger$  be the SVD of  $P$ , and  $\sigma_1 \geq \dots \geq \sigma_n \geq 0$  be the corresponding to singular values.

(a) For all  $r \in [n]$ , for all function  $f \in \mathbb{R}^n$ , we have

$$\frac{1 - \sigma_{r+1}^2}{2} \|f\|_2^2 \leq \mathcal{E}_{PP^\dagger}(f, f) + (1 - \sigma_{r+1}^2) \|U_r\|_{2,\infty}^2 \|f\|_1^2. \quad (6)$$

(b) For all  $r \in [n]$ , the result of Theorem 2 holds with  $\lambda = (1 - \sigma_{r+1}^2)/2$  and  $C = 2\|U_r\|_{2,\infty}^2$ .

As a consequence, if the coherence  $r^{-1}\|U_r\|_{2,\infty}^2$  of the  $r$  first left singular vectors of  $P$  is known to be bounded by  $C/2$  (independent of  $n$ ), then we can suggest to apply a shift  $k \approx \log(Cr\nu_{\min})/\log((1 + \sigma_{r+1}^2)/2)$  to ensure that  $\|P_k\|_{2,\infty} = \mathcal{O}(1)$  and that  $M_k$  can be estimated efficiently by using a low-rank approximation. Such a shift  $k$  is typically much smaller than the mixing time (when  $\sigma_2$  is close to 1 while  $\sigma_{r+1}$  remains bounded away from it). Note however that the singular values and the coherence of the singular vectors of  $P$  may be unknown in practice. In such cases, we propose an alternative method to study the decay rate of  $\|P^k\|_{2,\infty}$ .

## 5.2 Decomposable Markov chains

Another strategy to analyze the decay rate of  $\|P^k\|_{2,\infty}$  is to study *local mixing* behavior of the Markov chain via type II Poincaré inequalities, and combine these inequalities to derive a *global* type II Poincaré inequality. We formalize this idea as follows.

**Definition 4** (Induced Markov chain). Given a Markov chain on  $[n]$  with transition matrix  $P$  and a subset  $S \subseteq [n]$ , the induced chain on  $S$  is the Markov chain on  $S$  with transition matrix  $P_S$  given by

$$\forall x, y \in S : P_S(x, y) := \begin{cases} P(x, y) & \text{if } y \neq x, \\ P(x, x) + \sum_{z \notin S} P(x, z) & \text{if } y = x. \end{cases}$$

The induced measure  $\nu_S$  is the measure on  $S$  given by  $\nu_S(x) := \nu(x)/\nu(S)$  for all  $x \in S$ . We also denote by  $\mathcal{E}_{\nu_S, (PP^\dagger)_S} := \mathcal{E}_{(PP^\dagger)_S}$  the Dirichlet form constructed with the scalar product  $\langle \cdot, \cdot \rangle_{\nu_S}$ .

**Proposition 2.** Let  $P$  be Markov chain on  $[n]$  with invariant measure  $\nu$  and  $S \subseteq [n]$ . Suppose the induced chains  $(PP^\dagger)_S, (PP^\dagger)_{S^c}$  both satisfy a type II Poincaré inequality with respect to the induced measure: for  $B \in \{S, S^c\}$ ,

$$\forall f \in \mathbb{R}^B, \quad \lambda_B \|f\|_{\ell^2(\nu_B)}^2 \leq \mathcal{E}_{\nu_B, (PP^\dagger)_B}(f, f) + \lambda_B C_B \|f\|_{\ell^1(\nu_B)}^2,$$

<sup>2</sup>This terminology is inspired by (48, Chapter 2), where the author distinguishes two variants of Nash's argument, the second giving no direct bounds on mixing times (see Theorem 2.3.4).

305 Then  $P$  satisfies:  $\forall f \in \mathbb{R}^n$ ,  $\lambda \|f\|_{\ell^2(\nu)}^2 \leq \mathcal{E}_{\nu, PP^\dagger}(f, f) + \lambda C \|f\|_{\ell^1(\nu)}^2$  with  $\lambda = \min(\lambda_S, \lambda_{S^c})$  and  
 306  $C = \max\left(\frac{C_S}{\nu(S)}, \frac{C_{S^c}}{\nu(S^c)}\right)$ .

307 This result shows how to combine local type II Poincaré inequalities. It can be applied inductively to  
 308 consider more complex partitions of the state space, i.e., with more than two subsets. When comparing  
 309 to Theorem 3, we note  $\max_i \nu(S_i)^{-1}$  plays here a role analogous to the coherence. Proposition 2 is  
 310 very general, and we illustrate its application through the following simple example.

311 **The 4-room environment.** Consider a Markov chain whose transition graph  $G$  can be par-  
 312 titioned into 4 rooms or connected subgraphs  $(G_i)_{i \in [4]}$ , as shown in Fig. 3.  $G$  is obtained  
 313 by adding an edge between each pair  $(G_i, G_{i+1})$ . Consider the simple  
 314 random walk on  $G$  (at each step moves to a neighbor in  $G$  uniformly at  
 315 random). It is a irreducible reversible Markov chain with transition matrix  
 316  $P$  and stationary distribution  $\nu$ . The chain induced by  $P^2$  on  $G_i$  is also  
 317 reversible with spectral gap  $\lambda_i$ . The latter allows us to upper bound the  
 318 (local) mixing time of the chain on  $G_i$  as  $\lambda_i^{-1} \log(\nu_{\min})^{-1}$ . Proposition 2  
 319 yields an explicit bound on  $\|P^k\|_{2,\infty}$  which in turn, thanks to reversibility,  
 320 leads to an upper bound of the spectral recoverability of  $P^k$ . In summary,  
 321 we can state the following result, proved in Appendix G.

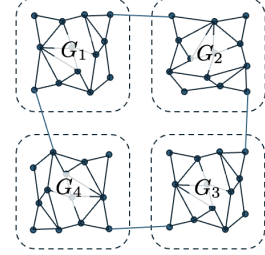

Figure 3: The four-room environment.

322 **Theorem 4.** For all  $k \geq 0$ , we have:

$$323 \|P^k\|_{2,\infty}^2 \leq (\min_{i \in [4]} \nu(G_i))^{-1} + (1 - \min_{i \in [4]} \lambda_i)^k \nu_{\min}^{-1}.$$

324 Furthermore, suppose that  $\min_{i \in [4]} \nu(G_i) \geq c$  for some constant  $c > 0$ .

325 Then for all  $\varepsilon \in (0, 1)$ , for all  $k \geq 2 \max_{i \in [4]} \lambda_i^{-1} \log(\nu_{\min}^{-1} \varepsilon^{-1} \sqrt{2/c})$ ,  $\|P^k - [P^k]_4\|_{2,\infty} \leq \varepsilon$ .

326 The above theorem illustrates how we can decompose a Markov chain into sub-chains so as to  
 327 understand the shift needed to estimate the matrix efficiently using a low-rank matrix. Assume for  
 328 example that the graphs  $G_i$  are bounded expanders (24). Then we have  $\lambda_i^{-1} = O(1)$  and  $\nu$  is, up to a  
 329  $\Theta(1)$  factor, uniform over all states. The shift required is just  $\log(n)$  and is much smaller than the  
 330 mixing time of the chain on  $G$  which is scaling as  $n \log(n)$ . We give further details and examples in  
 331 Appendix G.

## 332 6 Numerical Experiments

333 Successor measures have been proven useful in goal-conditioned reinforcement learning (GCRL)  
 334 (3; 8; 19; 56), where the aim is to learn policies  $\pi_g(a|s)$  that reach arbitrary goal states  $g \in \mathcal{S}$ .

335 Consider the goal-specific reward function  $R_g(s_t, a_t) = P(s_{t+1} = g | s_t, a_t)$ . As shown in Proposition  
 336 1 of (19), the corresponding state-action value function is given by  $Q^{(R_g, \pi_g)}(s, a) = M_{\pi_g}(s, a, g)$ ,  
 337 where  $M_{\pi_g}(s, a, g)$  is the marginalized successor measure  $M_{\pi_g}(s, a, g) = \sum_{b \in \mathcal{A}} M_{\pi_g}((s, a), (g, b))$ .  
 338 This implies that acting greedily with respect to  $M_{\pi_g}(s, a, g)$  leads to policy improvement. Our  
 339 experiments follow the setup of (18; 19), where the critic learns  $Q^{(R_g, \pi_{\mathcal{D}})}$  for a goal-marginalized  
 340 policy  $\pi_{\mathcal{D}}(a|s) = \int_{\mathcal{S}} \pi_g(a|s) d\rho_{\mathcal{D}}(g)$ , with  $\rho_{\mathcal{D}}(g)$  the empirical distribution of goals in dataset  $\mathcal{D}$ .  
 341 This setup reflects a common GCRL scenario in which the agent reuses past experience collected  
 342 under varying goals to improve sample efficiency.

343 We explore how structural modifications to the successor measures - specifically low-rank approxi-  
 344 mation (via truncated SVD) and shift - affect performance of goal-conditioned policies. Experiments  
 345 in this section are performed in the *Medium PointMaze* environment with 104 discrete states and 4  
 346 actions (see Figure 4 (a)). Additional numerical experiments are provided in Appendix H.

347 In Figure 4 (b), we observe that shifting successor measures sharpens the spectrum, accelerating  
 348 singular value decay. To quantify goal-reaching performance, we report two metrics: accuracy,  
 349 the probability of reaching the exact goal (from a random initial state), and relaxed accuracy, the  
 350 probability of reaching any state within two steps of the goal. In all cases, policies are derived greedily  
 351 with respect to the corresponding successor measure matrix. Figure 4 (c) shows that even when  
 352 using an oracle successor measure, introducing a temporal shift improves performance, especially  
 353 when combined with low-rank approximation. This benefit is particularly notable when success is



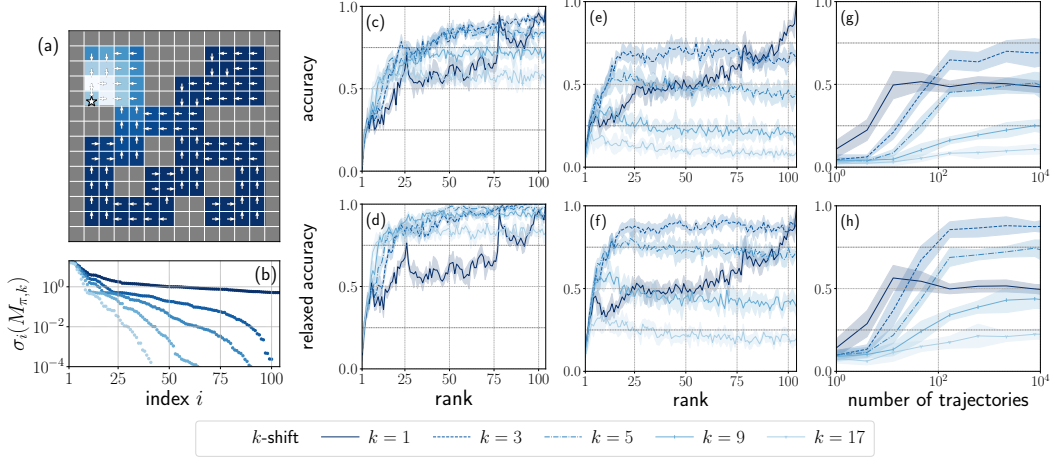

Figure 4: (a) Discrete *Medium Pointmaze* environment. States  $s$  are colored by  $\sum_{a,b \in \mathcal{A}} M_{\pi_{\mathcal{D}}}((s,a), (g,b))$ , with  $\gamma = 0.95$ , goal  $g$  marked by a star, and a uniform policy  $\pi_{\mathcal{D}}$ . Arrows indicate the greedy policy induced by  $M_{\pi_{\mathcal{D}}}$ . (b) Singular values of shifted successor measures. (c–d) Accuracy (probability of reaching a random goal) and relaxed accuracy (reaching its 2-neighborhood) as a function of rank and shift for true successor measures. (e–f) Same as (c–d), but for successor measures learned via TD. (g–h) Accuracy vs. number of trajectories of length  $H = 100$ . Results are averaged over 100 random goals and 5 seeds.

defined more flexibly, as shown in Figure 4 (d). These results suggest that shifting enhances the expressiveness of successor measures while compensating for rank constraints.

To estimate successor measures from data, we apply Temporal Difference (TD)-updates with targets  $\mathbb{1}[s_{t+k+1} = g, a_{t+k+1} = b] + \gamma M_{\pi_{\mathcal{D}}}((s_{t+k+1}, a_{t+k+1}), (g, b)) - M_{\pi_{\mathcal{D}}}((s_t, a_t), (g, b))$ , where  $(s_t, a_t, s_{t+k+1}, a_{t+k+1})$  are drawn from the same trajectory, and  $(g, b) \in \mathcal{X}$ . As shown in Figure 4 (e–f), higher shifts degrade performance when successor measures are learned via TD. This aligns with the intuition that estimating long-horizon dynamics is harder and introduces more error, particularly in low-data regimes. Finally, we assess how data efficiency depends on the shift parameter by fixing the rank to  $r = 40$  and varying the number of samples in Figure 4 (g–h). We find that a moderate shift ( $k = 3$ ) consistently yields the best performance, suggesting a trade-off: while shifting improves expressivity, its estimation must remain tractable. This is also shown in Fig. 1 in Section 1.

## 7 Conclusion

In this work, we considered the problem of estimating shifted successor measures. Our main result established an upper bound on the sample complexity for a simple estimator based on SVD truncation. Unlike previous work, we make no structural assumption on the matrix, showing that structure would generally emerge naturally from local mixing phenomena. This led us to introduce shifted successor measures, to better distinguish between small-range transitions which remain inherently high-rank dynamics, from long-range transitions where mixing phenomena take place and give rise to an approximately low-rank structure. This was empirically confirmed. Our experiments show that shifted successor measures are better approximated by their low-rank SVDs than the non-shifted counterpart, and that the use of shifts can bring performance improvements in (goal-conditioned) RL. These two main contributions open up many possibilities. From a theoretical perspective, we believe that our approach could be used to assess the sample complexity of estimating universal representations like the Forward-Backward model of (55). On the more practical side, the idea of shifting surely requires a more complete empirical analysis to better understand its impact across diverse RL settings.

## References

- [1] Emmanuel Abbe, Jianqing Fan, Kaizheng Wang, and Yiqiao Zhong. Entrywise eigenvector analysis of random matrices with low expected rank. *Ann. Statist.*, 48(3):1452–1474, 2020. doi:10.1214/19-AOS1854. 3, 25, 31
- [2] Alekh Agarwal, Sham Kakade, Akshay Krishnamurthy, and Wen Sun. FLAMBE: Structural Complexity and Representation Learning of Low Rank MDPs. In *Advances in Neural Information Processing Systems*, volume 33, pages 20095–20107. Curran Associates, Inc., 2020. 1, 2
- [3] Marcin Andrychowicz, Filip Wolski, Alex Ray, Jonas Schneider, Rachel Fong, Peter Welinder, Bob McGrew, Josh Tobin, OpenAI Pieter Abbeel, and Wojciech Zaremba. Hindsight experience replay. *Advances in neural information processing systems*, 30, 2017. 1, 8
- [4] Mohammad Gheshlaghi Azar, Rémi Munos, and Hilbert J. Kappen. Minimax PAC bounds on the sample complexity of reinforcement learning with a generative model. *Mach. Learn.*, 91(3):325–349, 2013. URL: <https://doi.org/10.1007/s10994-013-5368-1>, doi:10.1007/S10994-013-5368-1. 25
- [5] André Barreto, Will Dabney, Rémi Munos, Jonathan J Hunt, Tom Schaul, Hado P van Hasselt, and David Silver. Successor features for transfer in reinforcement learning. *Advances in neural information processing systems*, 30, 2017. 1
- [6] Pierre Bremaud. *Markov Chains: Gibbs Fields, Monte Carlo Simulation and Queues*, volume 31 of *Texts in Applied Mathematics*. Springer Nature, Cham, 2nd edition 2020 edition, 2020. 24
- [7] Emmanuel J. Candès and Benjamin Recht. Exact matrix completion via convex optimization. *Found. Comput. Math.*, 9(6):717–772, December 2009. 4
- [8] Elliot Chane-Sane, Cordelia Schmid, and Ivan Laptev. Goal-conditioned reinforcement learning with imagined subgoals. In *International conference on machine learning*, pages 1430–1440. PMLR, 2021. 8
- [9] Sourav Chatterjee. Stein’s method for concentration inequalities. *Probab. Theory Related Fields*, 138(1-2):305–321, 2007. doi:10.1007/s00440-006-0029-y. 21, 34
- [10] Sourav Chatterjee. Matrix estimation by universal singular value thresholding. *Ann. Statist.*, 43(1):177–214, 2015. doi:10.1214/14-AOS1272. 3, 4
- [11] Sourav Chatterjee. Spectral gap of nonreversible markov chains. *arXiv 2310.10876*, to appear in *Ann. Appl. Prob.*, 2025. URL: <https://arxiv.org/abs/2310.10876>. 45
- [12] Yuxin Chen, Yuejie Chi, Jianqing Fan, and Cong Ma. Spectral methods for data science: A statistical perspective. *Foundations and Trends® in Machine Learning*, 14(5):566–806, 2021. URL: <http://dx.doi.org/10.1561/22000000079>, doi:10.1561/22000000079. 31, 32
- [13] Pierre Collet, Servet Martínez, and Jaime San Martín. *Quasi-stationary distributions*. Probability and its Applications (New York). Springer, Heidelberg, 2013. Markov chains, diffusions and dynamical systems. doi:10.1007/978-3-642-33131-2. 24
- [14] Peter Dayan. Improving Generalization for Temporal Difference Learning: The Successor Representation. *Neural Computation*, 5(4):613–624, 07 1993. arXiv:<https://direct.mit.edu/neco/article-pdf/5/4/613/812523/neco.1993.5.4.613.pdf>, doi:10.1162/neco.1993.5.4.613. 1, 2, 3
- [15] P. Diaconis and L. Saloff-Coste. Logarithmic Sobolev inequalities for finite Markov chains. *Ann. Appl. Probab.*, 6(3):695–750, 1996. doi:10.1214/aoap/1034968224. 46
- [16] P. Diaconis and L. Saloff-Coste. Nash inequalities for finite Markov chains. *J. Theoret. Probab.*, 9(2):459–510, 1996. doi:10.1007/BF02214660. 3, 46, 47, 48

- [17] Yaqi Duan, Tracy Ke, and Mengdi Wang. State aggregation learning from markov transition data. In H. Wallach, H. Larochelle, A. Beygelzimer, F. d'Alché-Buc, E. Fox, and R. Garnett, editors, *Advances in Neural Information Processing Systems*, volume 32. Curran Associates, Inc., 2019. URL: [https://proceedings.neurips.cc/paper\\_files/paper/2019/file/070dbb6024b5ef93784428afc71f2146-Paper.pdf](https://proceedings.neurips.cc/paper_files/paper/2019/file/070dbb6024b5ef93784428afc71f2146-Paper.pdf). 2
- [18] Benjamin Eysenbach, Soumith Udatha, Russ R Salakhutdinov, and Sergey Levine. Imitating past successes can be very suboptimal. *Advances in Neural Information Processing Systems*, 35:6047–6059, 2022. 8
- [19] Benjamin Eysenbach, Tianjun Zhang, Sergey Levine, and Russ R Salakhutdinov. Contrastive learning as goal-conditioned reinforcement learning. *Advances in Neural Information Processing Systems*, 35:35603–35620, 2022. 1, 8, 54
- [20] James Allen Fill. Eigenvalue bounds on convergence to stationarity for nonreversible markov chains, with an application to the exclusion process. *The Annals of Applied Probability*, 1:62–87, 1991. doi:doi:10.1214/aoap/1177005981. 3, 46
- [21] Justin Fu, Aviral Kumar, Ofir Nachum, George Tucker, and Sergey Levine. D4rl: Datasets for deep data-driven reinforcement learning. *arXiv preprint arXiv:2004.07219*, 2020. 51
- [22] Sharad Goel, Ravi Montenegro, and Prasad Tetali. Mixing time bounds via the spectral profile. *Electron. J. Probab.*, 11:no. 1, 1–26, 2006. doi:10.1214/EJP.v11-300. 46
- [23] Diego Gomez, Michael Bowling, and Marlos C. Machado. Proper laplacian representation learning. In *The Twelfth International Conference on Learning Representations, ICLR 2024, Vienna, Austria, May 7-11, 2024*. OpenReview.net, 2024. URL: <https://openreview.net/forum?id=7gLfQT52Nn>. 2
- [24] Shlomo Hoory, Nathan Linial, and Avi Wigderson. Expander graphs and their applications. *Bull. Amer. Math. Soc.*, 43:439–561, 2006. URL: <http://www.ams.org/bull/2006-43-04/S0273-0979-06-01126-8/home.html>, doi:10.1090/S0273-0979-06-01126-8. 8
- [25] Roger A. Horn and Charles R. Johnson. *Topics in matrix analysis*. Cambridge University Press, Cambridge, 1994. Corrected reprint of the 1991 original. 7, 45, 48
- [26] Yassir Jedra, Junghyun Lee, Alexandre Proutiere, and Se-Young Yun. Nearly optimal latent state decoding in block mdps. In Francisco Ruiz, Jennifer Dy, and Jan-Willem van de Meent, editors, *Proceedings of The 26th International Conference on Artificial Intelligence and Statistics*, volume 206 of *Proceedings of Machine Learning Research*, pages 2805–2904. PMLR, 25–27 Apr 2023. URL: <https://proceedings.mlr.press/v206/jedra23a.html>. 2
- [27] Mark Jerrum, Jung-Bae Son, Prasad Tetali, and Eric Vigoda. Elementary bounds on Poincaré and log-Sobolev constants for decomposable Markov chains. *Ann. Appl. Probab.*, 14(4):1741–1765, 2004. doi:10.1214/105051604000000639. 3
- [28] Chi Jin, Akshay Krishnamurthy, Max Simchowitz, and Tiancheng Yu. Reward-free exploration for reinforcement learning. In *Proceedings of the 37th International Conference on Machine Learning, ICML 2020, 13-18 July 2020, Virtual Event*, volume 119 of *Proceedings of Machine Learning Research*, pages 4870–4879. PMLR, 2020. URL: <http://proceedings.mlr.press/v119/jin20d.html>. 20, 22
- [29] F. P. Kelly. *Reversibility and Stochastic Networks*. Cambridge University Press, USA, 2011. 49
- [30] Martin Klissarov and Marlos C. Machado. Deep laplacian-based options for temporally-extended exploration. In Andreas Krause, Emma Brunskill, Kyunghyun Cho, Barbara Engelhardt, Sivan Sabato, and Jonathan Scarlett, editors, *International Conference on Machine Learning, ICML 2023, 23-29 July 2023, Honolulu, Hawaii, USA*, volume 202 of *Proceedings of Machine Learning Research*, pages 17198–17217. PMLR, 2023. URL: <https://proceedings.mlr.press/v202/klissarov23a.html>. 2
- [31] Tejas D. Kulkarni, Ardavan Saeedi, Simanta Gautam, and Samuel J. Gershman. Deep successor reinforcement learning. *CoRR*, abs/1606.02396, 2016. URL: <http://arxiv.org/abs/1606.02396>, arXiv:1606.02396. 2

- [32] Charline Le Lan, Stephen Tu, Adam Oberman, Rishabh Agarwal, and Marc G. Bellemare. On the generalization of representations in reinforcement learning. In Gustau Camps-Valls, Francisco J. R. Ruiz, and Isabel Valera, editors, *Proceedings of The 25th International Conference on Artificial Intelligence and Statistics*, volume 151 of *Proceedings of Machine Learning Research*, pages 4132–4157. PMLR, 28–30 Mar 2022. URL: <https://proceedings.mlr.press/v151/le-lan22a.html>. 2
- [33] James R. Lee, Shayan Oveis Gharan, and Luca Trevisan. Multi-way spectral partitioning and higher-order Cheeger inequalities. In *STOC’12—Proceedings of the 2012 ACM Symposium on Theory of Computing*, pages 1117–1130. ACM, New York, 2012. doi:10.1145/2213977.2214078. 3
- [34] David A. Levin and Yuval Peres. *Markov chains and mixing times*. American Mathematical Society, Providence, RI, 2017. Second edition of [MR2466937], With contributions by Elizabeth L. Wilmer, With a chapter on “Coupling from the past” by James G. Propp and David B. Wilson. doi:10.1090/mbk/107. 25
- [35] Marlos C. Machado, André Barreto, Doina Precup, and Michael Bowling. Temporal abstraction in reinforcement learning with the successor representation. *J. Mach. Learn. Res.*, 24:80:1–80:69, 2023. URL: <https://jmlr.org/papers/v24/21-1213.html>. 2
- [36] Marlos C. Machado, Marc G. Bellemare, and Michael H. Bowling. A laplacian framework for option discovery in reinforcement learning. In Doina Precup and Yee Whye Teh, editors, *Proceedings of the 34th International Conference on Machine Learning, ICML 2017, Sydney, NSW, Australia, 6-11 August 2017*, volume 70 of *Proceedings of Machine Learning Research*, pages 2295–2304. PMLR, 2017. URL: <http://proceedings.mlr.press/v70/machado17a.html>. 2
- [37] Marlos C. Machado, Clemens Rosenbaum, Xiaoxiao Guo, Miao Liu, Gerald Tesauro, and Murray Campbell. Eigenoption discovery through the deep successor representation. In *6th International Conference on Learning Representations, ICLR 2018, Vancouver, BC, Canada, April 30 - May 3, 2018, Conference Track Proceedings*. OpenReview.net, 2018. URL: <https://openreview.net/forum?id=Bk8ZcAxR->. 2
- [38] Lester Mackey, Michael I. Jordan, Richard Y. Chen, Brendan Farrell, and Joel A. Tropp. Matrix concentration inequalities via the method of exchangeable pairs. *Ann. Probab.*, 42(3):906–945, 2014. doi:10.1214/13-AOP892. 34
- [39] Neal Madras and Dana Randall. Markov chain decomposition for convergence rate analysis. *Ann. Appl. Probab.*, 12(2):581–606, 2002. doi:10.1214/aoap/1026915617. 3
- [40] Sridhar Mahadevan and Mauro Maggioni. Value function approximation with diffusion wavelets and laplacian eigenfunctions. In Y. Weiss, B. Schölkopf, and J. Platt, editors, *Advances in Neural Information Processing Systems*, volume 18. MIT Press, 2005. URL: [https://proceedings.neurips.cc/paper\\_files/paper/2005/file/2650d6089a6d640c5e85b2b88265dc2b-Paper.pdf](https://proceedings.neurips.cc/paper_files/paper/2005/file/2650d6089a6d640c5e85b2b88265dc2b-Paper.pdf). 1, 2
- [41] Sridhar Mahadevan and Mauro Maggioni. Proto-value functions: A laplacian framework for learning representation and control in markov decision processes. *J. Mach. Learn. Res.*, 8:2169–2231, 2007. URL: <https://dl.acm.org/doi/10.5555/1314498.1314570>, doi:10.5555/1314498.1314570. 1, 2
- [42] Mehryar Mohri and Ameet Talwalkar. Can matrix coherence be efficiently and accurately estimated? In Geoffrey Gordon, David Dunson, and Miroslav Dudík, editors, *Proceedings of the Fourteenth International Conference on Artificial Intelligence and Statistics*, volume 15 of *Proceedings of Machine Learning Research*, pages 534–542, Fort Lauderdale, FL, USA, 11–13 Apr 2011. PMLR. URL: <https://proceedings.mlr.press/v15/mohri11a.html>. 4
- [43] Ravi Montenegro and Prasad Tetali. Mathematical aspects of mixing times in Markov chains. *Found. Trends Theor. Comput. Sci.*, 1(3):237–354, 2005. doi:10.1561/0400000003. 7, 46, 47
- [44] Ofir Nachum, Shixiang Shane Gu, Honglak Lee, and Sergey Levine. Data-efficient hierarchical reinforcement learning. *Advances in neural information processing systems*, 31, 2018. 54

- [45] Seohong Park, Dibya Ghosh, Benjamin Eysenbach, and Sergey Levine. Higl: Offline goal-conditioned rl with latent states as actions. *Advances in Neural Information Processing Systems*, 36:34866–34891, 2023. 54
- [46] Daniel Paulin, Lester Mackey, and Joel A. Tropp. Deriving matrix concentration inequalities from kernel couplings, 2013. arXiv:1305.0612. 34, 35
- [47] Benjamin Recht. A simpler approach to matrix completion. *J. Mach. Learn. Res.*, 12(null):3413–3430, December 2011. 4
- [48] Laurent Saloff-Coste. Lectures on finite Markov chains. In *Lectures on probability theory and statistics. Ecole d’été de probabilités de Saint-Flour XXVI–1996. Lectures given at the Saint-Flour summer school of probability theory, August 19–September 4, 1996*, pages 301–413. Berlin: Springer, 1997. 7, 47, 50
- [49] Tyler Sam, Yudong Chen, and Christina Lee Yu. Overcoming the long horizon barrier for sample-efficient reinforcement learning with latent low-rank structure. *Proc. ACM Meas. Anal. Comput. Syst.*, 7(2):29:1–29:60, 2023. doi:10.1145/3589973. 1, 2
- [50] Jaron Sanders, Alexandre Proutière, and Se-Young Yun. Clustering in block Markov chains. *Ann. Stat.*, 48(6):3488–3512, 2020. URL: [pure.tue.nl/ws/files/146734371/1712.09232v3.pdf](https://pure.tue.nl/ws/files/146734371/1712.09232v3.pdf), doi:10.1214/19-AOS1939. 2, 20
- [51] Devavrat Shah, Dogyoon Song, Zhi Xu, and Yuzhe Yang. Sample efficient reinforcement learning via low-rank matrix estimation. In Hugo Larochelle, Marc’Aurelio Ranzato, Raia Hadsell, Maria-Florina Balcan, and Hsuan-Tien Lin, editors, *Advances in Neural Information Processing Systems 33: Annual Conference on Neural Information Processing Systems 2020, NeurIPS 2020, December 6-12, 2020, virtual*, 2020. URL: <https://proceedings.neurips.cc/paper/2020/hash/8d2355364e9a2ba1f82f975414937b43-Abstract.html>. 1, 2
- [52] Kimberly L. Stachenfeld, Matthew M. Botvinick, and Samuel Gershman. Design principles of the hippocampal cognitive map. In Zoubin Ghahramani, Max Welling, Corinna Cortes, Neil D. Lawrence, and Kilian Q. Weinberger, editors, *Advances in Neural Information Processing Systems 27: Annual Conference on Neural Information Processing Systems 2014, December 8-13 2014, Montreal, Quebec, Canada*, pages 2528–2536, 2014. URL: <https://proceedings.neurips.cc/paper/2014/hash/dfd7468ac613286cddb40872c8ef3b06-Abstract.html>. 1, 2
- [53] Stefan Stojanovic, Yassir Jedra, and Alexandre Proutière. Spectral entry-wise matrix estimation for low-rank reinforcement learning. In Alice Oh, Tristan Naumann, Amir Globerson, Kate Saenko, Moritz Hardt, and Sergey Levine, editors, *Advances in Neural Information Processing Systems 36: Annual Conference on Neural Information Processing Systems 2023, NeurIPS 2023, New Orleans, LA, USA, December 10 - 16, 2023*, 2023. URL: [http://papers.nips.cc/paper\\_files/paper/2023/hash/f334c3375bd3744e98a0ca8eaa2403b0-Abstract-Conference.html](http://papers.nips.cc/paper_files/paper/2023/hash/f334c3375bd3744e98a0ca8eaa2403b0-Abstract-Conference.html). 2
- [54] Stefan Stojanovic, Yassir Jedra, and Alexandre Proutiere. Model-free low-rank reinforcement learning via leveraged entry-wise matrix estimation. In *Advances in Neural Information Processing Systems*, volume 37, 2024. 1, 2
- [55] Ahmed Touati and Yann Ollivier. Learning one representation to optimize all rewards. In Marc’Aurelio Ranzato, Alina Beygelzimer, Yann N. Dauphin, Percy Liang, and Jennifer Wortman Vaughan, editors, *Advances in Neural Information Processing Systems 34: Annual Conference on Neural Information Processing Systems 2021, NeurIPS 2021, December 6-14, 2021, virtual*, pages 13–23, 2021. URL: <https://proceedings.neurips.cc/paper/2021/hash/003dd617c12d444ff9c80f717c3fa982-Abstract.html>. 1, 2, 9
- [56] Ahmed Touati, Jérémy Rapin, and Yann Ollivier. Does zero-shot reinforcement learning exist? In *The Eleventh International Conference on Learning Representations, ICLR 2023, Kigali, Rwanda, May 1-5, 2023*. OpenReview.net, 2023. URL: [https://openreview.net/forum?id=MYEap\\_0cQI](https://openreview.net/forum?id=MYEap_0cQI). 1, 2, 3, 8, 54

- 576 [57] Yifan Wu, George Tucker, and Ofir Nachum. The laplacian in RL: learning representations  
577 with efficient approximations. In *7th International Conference on Learning Representations,*  
578 *ICLR 2019, New Orleans, LA, USA, May 6-9, 2019*. OpenReview.net, 2019. URL: <https://openreview.net/forum?id=HJlNpoA5YQ>. 2
- 580 [58] Xumei Xi, Christina Lee Yu, and Yudong Chen. Matrix estimation for offline reinforcement  
581 learning with low-rank structure. *CoRR*, abs/2305.15621, 2023. URL: <https://doi.org/10.48550/arXiv.2305.15621>, arXiv:2305.15621, doi:10.48550/ARXIV.2305.15621. 2
- 583 [59] Anru Zhang and Mengdi Wang. Spectral state compression of Markov processes. *IEEE Trans.*  
584 *Inf. Theory*, 66(5):3202–3231, 2020. doi:10.1109/TIT.2019.2956737. 2, 19
- 585 [60] Tianjun Zhang, Tongzheng Ren, Mengjiao Yang, Joseph Gonzalez, Dale Schuurmans, and  
586 Bo Dai. Making Linear MDPs Practical via Contrastive Representation Learning. In *Proceedings*  
587 *of the 39th International Conference on Machine Learning*, volume 162 of *Proceedings of*  
588 *Machine Learning Research*, pages 26447–26466. PMLR, 17–23 Jul 2022. 2

|     |                                                                                           |           |
|-----|-------------------------------------------------------------------------------------------|-----------|
| 589 | <b>Contents</b>                                                                           |           |
| 590 | <b>1 Introduction</b>                                                                     | <b>1</b>  |
| 591 | <b>2 Related Work</b>                                                                     | <b>2</b>  |
| 592 | <b>3 Preliminaries</b>                                                                    | <b>3</b>  |
| 593 | 3.1 MDPs and shifted successor measures . . . . .                                         | 3         |
| 594 | 3.2 Measure-induced norms and SVD . . . . .                                               | 3         |
| 595 | 3.3 Spectral recoverability . . . . .                                                     | 4         |
| 596 | <b>4 Estimation of the Shifted Successor Measure</b>                                      | <b>5</b>  |
| 597 | <b>5 When Low-rank Structure Emerges: Local Mixing Phenomena</b>                          | <b>6</b>  |
| 598 | 5.1 Local mixing estimates via Poincaré inequalities . . . . .                            | 7         |
| 599 | 5.2 Decomposable Markov chains . . . . .                                                  | 7         |
| 600 | <b>6 Numerical Experiments</b>                                                            | <b>8</b>  |
| 601 | <b>7 Conclusion</b>                                                                       | <b>9</b>  |
| 602 | <b>A Measure-induced Norms and SVDs, Shifted Successor Measures and Spectral Recover-</b> |           |
| 603 | <b>ability</b>                                                                            | <b>17</b> |
| 604 | A.1 Measure-induced norms and SVDs . . . . .                                              | 17        |
| 605 | A.2 Spectral recoverability: Proof of Lemma 1 . . . . .                                   | 18        |
| 606 | <b>B Sample Complexity Lower bounds for <math>\ \cdot\ _{2,\infty}</math> Guarantees</b>  | <b>19</b> |
| 607 | B.1 Block Markov chains . . . . .                                                         | 20        |
| 608 | B.2 Proof of Theorem 5 . . . . .                                                          | 20        |
| 609 | <b>C Discussion and proof of Theorem 1</b>                                                | <b>24</b> |
| 610 | C.1 Discussion . . . . .                                                                  | 24        |
| 611 | C.2 Main steps of the proof of Theorem 1 . . . . .                                        | 25        |
| 612 | C.3 Proof of Theorem 1 . . . . .                                                          | 27        |
| 613 | <b>D Entry-wise guarantees: leave-one-out analysis</b>                                    | <b>31</b> |
| 614 | D.1 Entry-wise guarantees for SVD estimation: proof of Theorem 6 . . . . .                | 31        |
| 615 | D.2 Technical lemmas . . . . .                                                            | 31        |
| 616 | D.3 Proof of Propositions 5 and 6 . . . . .                                               | 32        |
| 617 | <b>E Concentration in spectral norm for stochastic matrices</b>                           | <b>34</b> |
| 618 | E.1 Main concentration inequality . . . . .                                               | 34        |
| 619 | E.2 The method of exchangeable pairs . . . . .                                            | 34        |
| 620 | E.3 Exchangeable pairs for independent multinomial variables . . . . .                    | 35        |

|     |          |                                                                                |           |
|-----|----------|--------------------------------------------------------------------------------|-----------|
| 621 | E.4      | Concentration of the empirical estimator . . . . .                             | 37        |
| 622 | <b>F</b> | <b>Extension to shifted successor measures and leave-one-out concentration</b> | <b>40</b> |
| 623 | F.1      | Contraction properties of the map $P \mapsto P_\pi$ . . . . .                  | 40        |
| 624 | F.2      | Extension to shifted successor measure: proof of Theorem 7 . . . . .           | 40        |
| 625 | F.3      | Leave-one-out concentration . . . . .                                          | 42        |
| 626 | <b>G</b> | <b>Local mixing phenomena</b>                                                  | <b>45</b> |
| 627 | G.1      | Singular value bound: proof of Proposition 1 . . . . .                         | 45        |
| 628 | G.2      | Spectral recoverability for chains with normal transition matrices . . . . .   | 45        |
| 629 | G.3      | Functional inequalities for Markov chains . . . . .                            | 46        |
| 630 | G.4      | Type II Poincaré inequalities and applications . . . . .                       | 47        |
| 631 | G.4.1    | Proofs of Theorems 2 and 3 . . . . .                                           | 47        |
| 632 | G.4.2    | Combining inequalities of induced chains . . . . .                             | 48        |
| 633 | G.4.3    | The 4-room examples: proof of Theorem 4 . . . . .                              | 49        |
| 634 | <b>H</b> | <b>Further Numerical Experiments</b>                                           | <b>51</b> |
| 635 | H.1      | The 4-room environment . . . . .                                               | 51        |
| 636 | H.2      | Additional Navigation Tasks . . . . .                                          | 51        |
| 637 | H.3      | Non-uniform Data Collecting Policy . . . . .                                   | 53        |
| 638 | H.4      | Model-Based Estimation of Shifted Successor Measures . . . . .                 | 54        |
| 639 | H.5      | Extension to the Non-Tabular Setting . . . . .                                 | 54        |



## A Measure-induced Norms and SVDs, Shifted Successor Measures and Spectral Recoverability

In this appendix we establish the formalism that is used throughout the paper. We start with general notation.

**Notation** Given integers  $m \leq n$ , we write  $[m, n] =: \{m, \dots, n\}$  and in particular  $[n] =: \{1, \dots, n\}$ . We write  $n \wedge m := \min(n, m)$ . Vectors are seen as column vectors, measures are identified with row vectors. We write  $\mathbb{1}$  for the all-one vector,  $\mathbb{1}_i$  the indicator vector at  $i$ . Thus we write  $\mathbb{1}_i \mathbb{1}_j^\top$  for the matrix with only one non-zero entry at coordinate  $(i, j)$ , equal to 1. We use the notation  $\leq$  for positive semi-definite inequalities, abbreviated as p.s.d.. We use the usual Landau notations  $\mathcal{O}(\cdot)$ ,  $\Theta(\cdot)$ , etc. for asymptotic analysis.

### A.1 Measure-induced norms and SVDs

**Norms with respect to a measure** Given a measure  $\mu$  on  $[n]$ , let  $\langle f, g \rangle_\mu := \sum_{i \in [n]} \mu(i) f(i) g(i)$ . Note that up to a factor  $n$ , the usual inner product is recovered by taking the uniform measure for  $\mu$ . Given  $p \in [1, \infty]$ , we define the  $\ell^p$  norm

$$\|f\|_{\ell^p(\mu)} := \begin{cases} \left( \sum_{x \in \mathcal{X}} \mu(x) |f(x)|^p \right)^{1/p} & \text{if } p < \infty \\ \max_{x \in \mathcal{X}} |f(x)| & \text{if } p = \infty \end{cases}.$$

For simplicity we may keep the measure implicit and write only  $\|f\|_p = \|f\|_{\ell^p(\mu)}$ . We employ the term "norm" although  $\|\cdot\|_p$  define norms only if  $\mu$  has full support. Generally speaking, a lot of notions considered in the sequel may not be properly defined if  $\mu$  does not have full support. Rather than always requiring the measure to have full support, we take the convention that the results become trivial when an object is ill-defined because of the norm. In particular, we define  $\mu_{\min} := \min_i \mu(i)$  and consider that  $\mu_{\min}^{-1} = +\infty$  if  $\mu$  does not have full support.

**Adjoint operator and SVD** When considering rectangular  $A \in \mathbb{R}^{n \times m}$  we need to define two underlying measures  $\mu, \nu$  on  $[m]$  and  $[n]$ . If  $n = m$ , we always take  $\mu = \nu$ . The adjoint operator  $A^\dagger \in \mathbb{R}^{m \times n}$  is the unique operator that satisfies  $\langle Af, g \rangle_\nu = \langle f, A^\dagger g \rangle_\mu$  for all  $f \in \mathbb{R}^m, g \in \mathbb{R}^n$ . It is explicitly given by

$$A^\dagger(i, j) := \frac{\nu(i) A(i, j)}{\mu(j)}. \quad (7)$$

If  $n = m$  and  $\mu = \nu$  is uniform,  $A^\dagger = A^\top$  is nothing but the transpose of  $A$ . Thus every notion that could normally be defined with a transpose will be here considered with the adjoint instead.

This applies in particular to the singular value decomposition (SVD). The left singular vectors  $(\psi_i)_{i=1}^{n \wedge m}$ , resp. right singular vectors  $(\phi_i)_{i=1}^{n \wedge m}$  of  $A \in \mathbb{R}^{n \times m}$  are defined as the eigenvectors of the self-adjoint matrix  $AA^\dagger$ , resp.  $A^\dagger A$ , corresponding to singular values  $\sigma_1 \geq \dots \geq \sigma_{n \wedge m} \geq 0$  which we always assume to be in non-increasing order. In matrix form, the SVD writes  $A = U \Sigma V^\dagger$  where  $\Sigma = \text{Diag}((\sigma_i)_{i=1}^{n \wedge m})$  while  $U \in \mathbb{R}^{n \times n}, V \in \mathbb{R}^{m \times m}$  are unitary in the sense  $U^\dagger U = U U^\dagger = I$  and  $V^\dagger V = V V^\dagger = I$ . This implies that  $U(x, i) := \sqrt{\mu(i)} \psi_i(x), V(x, i) := \sqrt{\mu(i)} \phi_i(x)$  for all  $i, x \in [n]$ , so the  $i$ -th column of  $U, V$  does not exactly contain the entries of  $i$ -th singular vector. Given  $r \in [n \wedge m]$ , we write  $[A]_r = U_r \Sigma_r V_r^\dagger$  for the SVD truncated to rank  $r$  and  $[A]_{>r} = A - [A]_r = U_{>r} \Sigma_{>r} U_{>r}^\dagger$ .

**Norm of a row vector** If  $f \in \mathbb{R}^n$  is seen as a column vector, we define the row vector  $f^\dagger$  by  $f^\dagger(i) := f(i) \mu(i)$ . This allows to have  $\langle f, g \rangle_\mu = f^\dagger g$ . Conversely for a row vector  $\rho$  we define  $\rho^\dagger$  as a column vector by  $\rho^\dagger(i) := \rho(i) / \mu(i)$ . We then define  $\ell^p(\mu)$  norms of row vectors by the fact that  $\|f^\dagger\|_{\ell^p(\mu)} = \|f\|_{\ell^{p^\dagger}(\mu)}$  where  $p^\dagger$  is the Hölder conjugate of  $p$ , defined by  $\frac{1}{p} + \frac{1}{p^\dagger} = 1$ . In particular note that for indicator vectors,

$$\|\mathbb{1}_i\|_{\ell^2(\mu)} = \sqrt{\mu(i)}, \quad \|\mathbb{1}_i^\top\|_{\ell^2(\mu)} = \frac{1}{\sqrt{\mu(i)}}. \quad (8)$$

680 **Matrix norms** Given a matrix  $A \in \mathbb{R}^{n \times m}$  and  $p, q \in [1, \infty]$ , we define the operator norm

$$\|A\|_{\ell^p(\mu), \ell^q(\nu)} := \sup_{\substack{f \in \mathbb{R}^n \\ f \neq 0}} \frac{\|Af\|_{\ell^q(\nu)}}{\|f\|_{\ell^p(\mu)}}.$$

681 Since the  $\ell^\infty(\mu)$  norm does not depend on a measure, we will write more simply  $\ell^\infty$ . As for vectors,  
 682 we may also write more simply  $\|A\|_{p,q}$  when the underlying measures are clear. The  $\|\cdot\|_{2,2}$  norm  
 683 will also be called spectral norm. Our definition of row vector norms made to ensure the following  
 684 property: if  $\rho$  is a row vector then we can also upper bound  $\|\rho A\|_{p,q} \leq \|\rho\|_q \|A\|_{p,q}$ . For later use, we  
 685 also recall the standard fact that

$$\|A\|_{p,q} := \|A^\dagger\|_{q^\dagger, p^\dagger}. \quad (9)$$

686 which is a consequence of Hölder's inequality.

687 In the sequel we will be specifically interested in the following norms, that can be distinguished in  
 688 two categories:

689 1. unitarily invariant norms, including the spectral, nuclear and Frobenius norm, which are  
 690 respectively the  $\ell^\infty, \ell^1, \ell^2$  norms of singular values:

$$\|A\|_{2,2} = \sigma_1, \quad \|A\|_* = \sum_{i=1}^n \sigma_i, \quad \|A\|_F = \text{tr}(A^\dagger A)^{1/2} = \left( \sum_{i=1}^n \sigma_i^2 \right)^{1/2}. \quad (10)$$

691 2. "entrywise" norms:

$$\|A\|_{\infty, \infty} = \max_{i \in [n]} \sum_{j \in [m]} |A(i, j)|, \quad \|A\|_{2, \infty} = \max_{i \in [n]} \left( \sum_{j \in [m]} \frac{|A(i, j)|^2}{\mu(j)} \right)^{1/2}. \quad (11)$$

692 Unlike unitarily invariant norms, these depend on singular vectors: for the two-to-infinity we can  
 693 make the dependence explicit in the left singular vectors: it is easily checked that

$$\|A\|_{2, \infty}^2 = \max_{x \in [n]} \sum_{i=1}^n \sigma_k^2 \psi_i(x)^2 \quad (12)$$

694 By duality (9),  $\|A\|_{1,2}^2 = \|A^\dagger\|_{2, \infty}^2 = \max_{j \in [m]} \sum_{k=1}^{n \wedge m} \sigma_k^2 \phi_k(j)^2$ . Note the inequalities

$$\|\cdot\|_? \leq \|\cdot\|_{2, \infty} \leq \nu_{\min}^{-1/2} \|\cdot\|_? \quad (13)$$

695 for all  $\|\cdot\|_? \in \{\|\cdot\|_{2,2}, \|\cdot\|_F, \|\cdot\|_{\infty, \infty}\}$ , as well as the submultiplicative inequalities

$$\|AB\|_{2, \infty} \leq \|A\|_{\infty, \infty} \|B\|_{2, \infty}, \quad \|AB\|_{2, \infty} \leq \|A\|_{2, \infty} \|B\|_{2,2}.$$

696 **Stochastic matrices and invariant measures** We will often use an arbitrary measure, but in the  
 697 context of finite Markov chains invariant measures are the most natural choices. On top of giving  
 698 a probabilistic meaning and making a link with mixing as argued in Section 5, we will be mostly  
 699 interested in invariant measures to obtain contraction properties. Given a stochastic matrix  $P \in \mathbb{R}^{n \times m}$ ,  
 700 it is readily seen from (11) that  $\|P\|_{\infty, \infty} = 1$ . On the other hand

$$\|P^\dagger\|_{\infty, \infty} = \|P\|_{1,1} = \max_{j \in [m]} \frac{\sum_{i \in [n]} \nu(i) P(i, j)}{\mu(j)}.$$

701 hence  $\|P^\dagger\|_{\infty, \infty} \leq 1$  if and only if  $\nu P \leq \mu$  pointwise. If  $n = m$ , this forces  $\mu$  to be an *invariant*  
 702 *measure*. The Riesz-Thorin interpolation theorem then implies that  $\|P\|_{p,p} \leq 1$  for all  $p \in [1, \infty]$ .  
 703 In particular this implies that the spectral norm  $\|P\|_{2,2} = \sigma_1 = 1$  (corresponding to the all-one  
 704 eigenvector and singular vector) and all singular values are bounded by 1.

## 705 A.2 Spectral recoverability: Proof of Lemma 1

706 *Proof of Lemma 1.* From (12) and the definition of the spectral recoverability we immediately see  
 707 that

$$\|M - [M]_r\|_{2, \infty}^2 = \sum_{i \geq r+1} \sigma_i^2 \psi_i(x)^2 \leq \sigma_{r+1} \xi(M).$$

708 □

## B Sample Complexity Lower bounds for $\|\cdot\|_{2,\infty}$ Guarantees

In this appendix, we provide a minimax lower bound on the estimation error of (non-shifted) successor measures under a generative model, i.e., when observing independent transitions of the Markov chain.

**Definition 5.** Let  $\mathcal{P}$  a subset of stochastic matrices of size  $n \times m$ . Given  $P \in \mathcal{P}$  and a vector  $Z \in \mathbb{N}^n$  with non-negative integer entries, consider a family  $(x_t, y_t)_{t=1}^T \in ([n] \times [m])^T$  obtained by sampling  $Z_i$  transitions under  $P(i, \cdot)$  for each  $i \in [n]$ , independently of all other transitions. We write  $\mathbb{P}_P$  for the law of  $(x_t, y_t)_{t=1}^T$ . Given a map  $f : \mathcal{P} \rightarrow \mathbb{R}^d$ , a norm  $\|\cdot\|$  on  $\mathbb{R}^d$ ,  $\varepsilon > 0$  and  $\delta \in [0, 1]$ , an estimator  $\widehat{M}$  of  $f(P)$  is said to be  $(\varepsilon, \delta)$ -PAC with for  $\mathcal{P}$  and the norm  $\|\cdot\|$  if for all stochastic matrix  $P \in \mathcal{P}$ ,  $\mathbb{P}_P [\|\widehat{M} - f(P)\| > \varepsilon] \leq \delta$ .

The following proposition shows the sample complexity of estimating of the successor measure is essentially the same as that of estimating the transition matrix itself.

**Proposition 3.** Let  $P \in \mathbb{R}^{n \times n}$  be a stochastic matrix and  $\gamma, \varepsilon \in [0, 1]$ . Suppose  $\widehat{M}$  is a  $(\varepsilon, \delta)$ -PAC estimator of  $M = (I - \gamma P)^{-1}$  for the norm  $\|\cdot\|_{\infty, \infty}$ . Then  $\widehat{P} := \frac{1}{\gamma}(I - \widehat{M}^{-1})$  is a  $(4\varepsilon/\gamma, \delta)$ -PAC estimator of  $P$  for the  $\|\cdot\|_{\infty, \infty}$  norm.

*Proof.* Suppose  $\|\widehat{M} - M\|_{\infty, \infty} \leq \varepsilon$ . First we show  $\widehat{M}$  almost satisfies the Bellman equation: using that  $M = I + \gamma PM$

$$\begin{aligned} \|\widehat{M} - (I + \gamma P \widehat{M})\|_{\infty, \infty} &= \|(I - \gamma P)(\widehat{M} - M)\|_{\infty, \infty} \\ &\leq \|(I - \gamma P)\|_{\infty, \infty} \|\widehat{M} - M\|_{\infty, \infty} \\ &\leq (1 + \gamma \|P\|_{\infty, \infty}) \varepsilon \\ &\leq 2\varepsilon. \end{aligned}$$

Then using  $\gamma \widehat{P} = I - \widehat{M}^{-1}$

$$\begin{aligned} \|\gamma(\widehat{P} - P)\|_{\infty, \infty} &= \|I - \widehat{M}^{-1} - \gamma P\|_{\infty, \infty} \\ &= \|(\widehat{M} - I - \gamma P \widehat{M})\widehat{M}^{-1}\|_{\infty, \infty} \\ &\leq \|\widehat{M} - I - \gamma P \widehat{M}\|_{\infty, \infty} \|\widehat{M}^{-1}\|_{\infty, \infty} \\ &\leq 2\varepsilon \|I - \gamma \widehat{P}\|_{\infty, \infty} \\ &\leq 4\varepsilon. \end{aligned}$$

□

By the previous proposition, we are led to derive a lower bound on the sample complexity for estimating the transition matrix.

**Theorem 5.** For all integer  $n$  large enough, for all  $\kappa \in [1, n]$ , there exists a family  $\mathcal{P}_\kappa$  of Markov chains on  $[n]$  which satisfies:

- (i) every  $P \in \mathcal{P}_\kappa$  is reversible with uniform invariant measure,
- (ii) for all  $P \in \mathcal{P}_\kappa$ , we have  $\xi(P) \leq \kappa$ ,
- (iii) there exists a universal constant  $C > 0$  such that for all  $\varepsilon > 0$ , if  $(\sum_{x \in [n]} Z_x) \leq C\varepsilon^{-2} \max(n, \kappa^2)$ , then there exists no  $(\varepsilon, \delta)$ -PAC estimator for  $\mathcal{P}_\kappa$  and the  $\|\cdot\|_{\infty, \infty}$  norm.

In (59, Theorem 2), the authors consider the problem of estimating a rank  $r$  transition matrix from a trajectory and prove a minimax lower bound on the sample-complexity of order  $rn/\varepsilon^2$ . Our lower bound attempts to mimic this result by replacing the rank  $r$  with the spectral recoverability, but only proves a lower bound of order  $\max(n, \kappa^2)\varepsilon^{-2}$ . Our class of examples is based on block Markov chains which allows to express the spectral recoverability as that of a smaller chain (Lemma 3). Intuitively, the sample-complexity of  $\kappa^2$  is that of learning the smaller chain, while  $n$  is the complexity required to learn the partition into blocks. To get a lower bound of order  $\kappa n \varepsilon^{-2}$ , we believe it is necessary to consider a soft partitioning of states, a.k.a state aggregation or mixed membership model as in (59). However we do not know how to extend the result of Lemma 3 to that case.

## 744 B.1 Block Markov chains

745 Our class of examples consist of Block Markov chains similar to those considered in (50).

746 **Definition 6.** Consider a Markov chain on  $[n]$  with transition matrix  $P$ . It is a block Markov chain  
 747 with  $k$  blocks if there exists a stochastic matrix  $Q$  on  $[k]$ , a partition of  $[n]$  into  $k$  subsets  $V_1, \dots, V_k$   
 748 and a stochastic matrix  $p \in \mathbb{R}^{k \times n}$  such that

$$\forall x, y \in [n] : P(x, y) = Q(V(x), V(y))p(V(y), y) \quad (14)$$

749 where we write  $V(x)$  for the subset of the partition containing  $x$ . Furthermore we require that  
 750  $p(i, x) > 0$  implies  $x \in V_i$ , which implies that (14) writes matricially as  $P = Qp$ . We call  $Q$  the  
 751 inter-block matrix and  $p$  the emission matrix.

752 **Lemma 2.** Let  $P$  be a block Markov chain with inter-block matrix  $Q$  and emission matrix  $p$ . Then  
 753 for all invariant measure  $\mu$  of  $Q$ ,  $\mu p$  is invariant for  $P$ . Secondly, when these measures are taken as  
 754 underlying the notions of adjoint, we have  $pp^\dagger = I$  and

$$P = p^\dagger Q p.$$

755 *Proof.* Suppose  $\mu$  is invariant. Then we check that for all  $y \in [n]$ ,

$$\begin{aligned} \sum_{x \in [n]} \mu p(x) P(x, y) &= \sum_{i \in [k], x \in [n]} \mu(i) p(i, x) Q(V(x), V(y)) p(V(y), y) \\ &= \sum_{i \in [k], x \in [n]} \mu(i) p(i, x) Q(i, V(y)) p(V(y), y) \\ &= \sum_{i \in [k]} \mu(i) Q(i, V(y)) p(V(y), y) \\ &= \mu(V(y)) p(V(y), y) = \mu p(y). \end{aligned}$$

756 The second and last line have used that  $p(i, x) > 0$  implies  $x \in V_i$ . This is also crucial for the  
 757 statement: computing the adjoint of  $p$  we have

$$p^\dagger(x, i) = \frac{\mu(i) p(i, x)}{\mu p(x)} = \mathbb{1}_{x \in V_i}.$$

758 Thus  $pp^\dagger = I$  and  $P(x, y) = \sum_{i, j \in [k]} \mathbb{1}_{x \in V_i} Q(i, j) p(j, y) = p^\dagger Q p(x, y)$  for all  $x, y \in [n]$ .  $\square$

759 Our interest for block Markov chains comes from the following.

760 **Lemma 3.** Under the assumptions made in the previous lemma,  $\xi(P) = \xi(Q)$ . In particular  
 761  $\xi(P) \leq \mu_{\min}^{-1}$ .

762 *Proof.* From the lemma, we can thus compute  $P^\dagger = p^\dagger Q^\dagger p$  and

$$PP^\dagger = p^\dagger Q Q^\dagger p, \quad P^\dagger P = p^\dagger Q^\dagger Q p.$$

763 In particular this shows that if  $\phi$ , resp.  $\psi$  is a right, resp. left singular vector of  $Q$  associated with  
 764 singular value  $\sigma$  then  $p^\dagger \phi$ , resp.  $p^\dagger \psi$  is a right, resp. left singular vector of  $P$  associated with singular  
 765 value  $\sigma$ . Note also that  $P$  is a rank  $k$  matrix so all non-zero singular values are obtained this way.  
 766 Thus from Definition 3

$$\xi(P) = \max_{x \in [n]} \sum_{i=1}^k \sigma_i (p^\dagger \psi_i(x))^2 = \max_{j \in [k]} \sum_{i=1}^k \sigma_i (\psi_i(j))^2 = \xi(Q).$$

767  $\square$

## 768 B.2 Proof of Theorem 5

769 Our class of examples for the minimax lower bound are made of block Markov chain as described  
 770 in the previous section. We consider in fact two different classes: for the first one we fix the block  
 771 partition and the emission probabilities, and make vary the inter-block matrix, while for the second we  
 772 fix the block partition and the inter-block matrix, and make vary the possible emission probabilities.  
 773 We build these using a similar process as for the lower bound for reward-free RL of (28).

774 **Lemma 4.** Consider an integer  $n \geq 0$  and  $\mathcal{A}_n := \{b \in \{-1, 0, 1\}^n : \sum_i b_i = 0\}$ . If  $n$  is sufficiently  
775 large there exists a subset  $\mathcal{B}_n \subset \mathcal{A}_n$  such that

776 (i)  $|\mathcal{B}_n| \geq e^{n/40}$ ,

777 (ii) for all  $b \neq b' \in \mathcal{B}_n$ ,  $\|b - b'\|_1 \geq \frac{n-1}{2}$ .

778 *Proof.* If  $n$  is odd, we simply set the last entry of all  $b$  to 0 (hence the  $n-1$  in (ii)). Therefore we  
779 suppose now  $n$  is even and write  $n = 2m$ . We construct the set  $\mathcal{B}$  at random. Let  $b_0 \in \mathcal{A}_n$  such that  
780  $b_0(i) = 1$  if  $i \in [m]$  and  $b_0(i) = -1$  if  $i \in [m+1, 2m]$ . All the vectors of  $\mathcal{A}_n$  can be obtained by  
781 permuting the entries of  $b_0$ . Consequently consider the set

$$\mathcal{B} = \{S_i b_0, i \in [N]\}$$

782 where  $(\sigma_i)_{i=1}^N$  are independent permutations chosen uniformly at random and  $S_i(k, l) = \mathbb{1}_{l=\sigma_i(k)}$  is  
783 the permutation matrix of  $\sigma_i$ . By union bound and symmetry for all  $t \geq 0$

$$\mathbb{P}[\exists b \neq b' \in \mathcal{B}, \|b - b'\|_1 \geq t] \leq N(N-1)\mathbb{P}[\|Sb_0 - b_0\|_1 \geq t]$$

784 where  $S$  is the matrix of a uniform permutation. Observe

$$\begin{aligned} \|Sb_0 - b_0\|_1 &= 2 \sum_{i=1}^m \mathbb{1}_{\sigma(i) > m} + 2 \sum_{i=m+1}^{2m} \mathbb{1}_{\sigma(i) \leq m} \\ &= 2 \sum_{i=1}^{2m} A_{i, \sigma(i)} \end{aligned}$$

785 where  $A_{i,j} = \mathbb{1}_{i \leq m, j > m} + \mathbb{1}_{i > m, j \leq m}$ . Since this matrix has its entries in  $[0, 1]$ , we can apply Chatterjee's  
786 concentration inequality for uniform permutations (9, Prop. 1.1) to  $X = \sum_{i=1}^n A_{i, \sigma(i)}$  to obtain

$$\mathbb{P}[|X - 2m| \geq t] \leq 2 \exp\left(\frac{-t^2}{8m + t}\right).$$

787 We deduce that with probability at least  $1 - 2N(N-1)e^{-m/9}$ , all pairs  $b \neq b' \in \mathcal{B}$  satisfy  $\|b - b'\|_1 \geq$   
788  $m = n/2$ . Thus by taking  $N \leq e^{m/40}$  this remains larger than  $1 - e^{-\Theta(m)}$  so for  $m$  large enough the  
789 set  $\mathcal{B}$  satisfies the requirements with positive probability.  $\square$

790 We now construct our two classes as follows. Consider integers  $k, m \geq 1$  large enough,  $n := km$   
791 and the partition  $[n] = \cup_{i=1}^k [(i-1)m+1, im] =: \cup_{i=1}^k V_i$ . For the first class, let  $Q$  be any reversible  
792 Markov chain on  $[k]$  with uniform invariant measure. Then given  $\varepsilon \in (0, 1/3)$  and a family of  
793 vectors  $B = (b_i)_{i=1}^k \in \mathcal{B}_m^k$  taken from the previously constructed set, define for all  $i \in [k], y \in [n]$  the  
794 emission probabilities:

$$p_B(i, y) := \frac{1 + 3\varepsilon b_i(y \bmod m)}{m}. \quad (15)$$

795 Having  $\varepsilon < 1/3$  and  $b_i \in \{-1, 0, 1\}^k$  makes the entries of  $p_B$  non-negative, and the fact that  $\sum_j b_i(j) =$   
796  $0$  implies that  $\sum_y p_B(i, y) = 1$ , so  $p_B$  defines a stochastic matrix. Then let  $P_B$  be the block markov  
797 chain with block partition  $\cup_{i=1}^k V_i$ , inter-block matrix  $Q$  and emission matrix  $p_B$ . We construct the  
798 first class  $\mathcal{P}_k^{(1)} := (P_B)_{B \in \mathcal{B}_m^k}$  as the collection of such matrices for all emission probabilities.

799 For the second class, let  $p_0$  be the uniform emission matrix, defined by  $p_0(i, y) = 1/m \mathbb{1}_{y \in V_i}$ . We  
800 then want to use the set  $\mathcal{B}_k$  to construct a family of inter-block matrices  $Q_B$ , however we require the  
801 chains to be reversible. A simple way to produce reversible is by considering a random walk on a  
802 network: given a non-directed graph  $G$  on  $n$  vertices equipped with non-negative weights  $c = (c(e))_e$   
803 on its edges, setting  $P(x, y) := \frac{c(x, y)}{\sum_z c(x, z)}$  defines a reversible Markov chain with invariant measure  
804  $\mu(x) \propto \sum_y c(x, y)$  proportional to the sum of weights. Thus we will use the set  $\mathcal{B}_k$  to define weights.  
805 Given a family of vectors  $B = (b_i)_{i=1}^k \in \mathcal{B}_k^k$  define

$$c_B(i, j) := 1 + 3\varepsilon b_i(j). \quad (16)$$

806 Since  $\varepsilon < 1/3$ , the weights are non-negative and we can define a stochastic matrix  $Q_B$  with transition  
807 probabilities proportional to the  $c_B$ . It is automatically reversible, with invariant measure at  $i$  being

proportional to  $\sum_{j \in [k]} c_B(i, j) = k$ , so the uniform measure is invariant. Let  $P_B$  be the block markov chain with block partition  $\bigcup_{i=1}^k V_i$ , inter-block matrix  $Q_B$  and emission matrix  $p_0$ . We construct the second class  $\mathcal{P}_k^{(2)} := (P_B)_{B \in \mathcal{B}_k^k}$  as the collection of such matrices for all inter-block matrices. Finally let  $\mathcal{P}_k := \mathcal{P}_k^{(1)} \cup \mathcal{P}_k^{(2)}$ .

**Lemma 5.** *For some constant  $C > 0$ , for  $k, m$  large enough we have*

- if  $(\sum_{x \in [n]} Z_x) \leq C\varepsilon^{-2}n$ , there exists no  $(\varepsilon, 1/2)$ -PAC estimator for the class  $\mathcal{P}_k^{(1)}$  and the  $\|\cdot\|_{\infty, \infty}$  norm.
- if  $(\sum_{x \in [n]} Z_x) \leq C\varepsilon^{-2}k^2$ , there exists no  $(\varepsilon, 1/2)$ -PAC estimator for the class  $\mathcal{P}_k^{(2)}$  and the  $\|\cdot\|_{\infty, \infty}$  norm.

*Proof of Theorem 5.* Given  $\kappa \geq 1$ , let  $k := \lfloor \kappa \rfloor$  and define the family  $\mathcal{P}_k$  as described above. Every chain of  $P \in \mathcal{P}$  is a block Markov chain with inter-block matrix  $Q$  which is reversible with uniform invariant measure, hence Lemma 2 shows that  $P^\dagger = P$  is also reversible with uniform invariant measure. Then Lemma 3 shows  $\xi(P) = \xi(Q) \leq k \leq \kappa$ . This proves the class  $\mathcal{P}$  satisfies the requirements (i) and (ii). Finally Lemma 5 shows (iii).  $\square$

The proof of Lemma 5 is based on Fano's inequality, as stated in (28, Lemma D.10).

**Proposition 4** (Fano's inequality). *Let  $P_1, \dots, P_M$  be  $M$  probability measures on a space  $\Omega$ . For any estimator  $\hat{j}$  on  $\Omega$*

$$\frac{1}{M} \sum_{j=1}^M P_j [\hat{j} \neq j] \geq 1 - \frac{\inf_{P_0} \frac{1}{M} \sum_{j=1}^M \text{KL}(P_j, P_0) + \log 2}{\log M}$$

where the infimum is on all probability measures on  $\Omega$ .

*Proof of Lemma 5.* We start with  $\mathcal{P}_k^{(1)}$ . Consider  $P_B, P_{B'} \in \mathcal{P}_k^{(1)}$ . If  $P_B \neq P_{B'}$  there exists  $x \in [n]$  such that  $P_B(x, \cdot) \neq P_{B'}(x, \cdot)$ . Then by construction

$$\begin{aligned} \|P_B - P_{B'}\|_{\infty, \infty} &\geq \sum_{y \in [n]} |P_B(x, y) - P_{B'}(x, y)| \\ &= \frac{3\varepsilon}{n} \sum_{y \in [m]} |b_{V(x)}(y) - b'_{V(x)}(y)| \\ &= \frac{3\varepsilon}{n} \|b_{V(x)} - b'_{V(x)}\|_1 \geq \frac{3\varepsilon}{2} (1 - 1/n) \end{aligned}$$

by the second condition of Lemma 4. For  $n$  large enough this is strictly larger than  $\varepsilon$ . Thus an  $(\varepsilon, \delta)$ -PAC estimator of  $\mathcal{P}_k$  for the  $\|\cdot\|_{\infty}$  norm yields an  $(\varepsilon, \delta)$ -PAC estimator of  $B$ . Given a stochastic matrix  $P$  on  $[n]$ , let us write  $\mathbb{P}_P$  for the law of the process generated when sampling independent  $Z_i$  transitions at every state  $i$ . Thus by Fano's inequality (Proposition 4)

$$\frac{1}{|\mathcal{B}_m^k|} \sum_{B \in \mathcal{B}_m^k} \mathbb{P}_{P_B} [\hat{B} \neq B] \geq 1 - \frac{\frac{1}{|\mathcal{B}_m^k|} \sum_{B \in \mathcal{B}_m^k} \text{KL}(\mathbb{P}_{P_B}, \mathbb{P}_{P_0}) + \log 2}{\log |\mathcal{B}_m^k|}$$

for any stochastic matrix  $P_0$ . The process generated by  $P$  is a product of independent multinomial  $\text{Multinom}(Z_i, P(i, \cdot))$ , thus we can compute

$$\text{KL}(\mathbb{P}_P, \mathbb{P}_Q) = \sum_{x, y \in [n]} Z_x P(x, y) \log \left( \frac{P(x, y)}{Q(x, y)} \right).$$

834 We take for  $P_0$  the block Markov chain with partition  $(V_i)_i$ , inter-block matrix  $Q$  and uniform  
 835 emission probability  $p_0(i, y) = 1/m \mathbb{1}_{y \in V_i}$ . Then exploiting the block structure we have

$$\begin{aligned} \text{KL}(\mathbb{P}_{P_B}, \mathbb{P}_{P_0}) &= \sum_{x, y \in [n]} Z_x P_B(x, y) \log \left( \frac{P_B(x, y)}{P_0(x, y)} \right) \\ &= \sum_{x, y \in [n]} Z_x Q_B(V(x), V(y)) p_B((V(y), y)) \log \left( \frac{p_B(V(y), y)}{p_0(V(y), y)} \right) \\ &= \sum_{x \in [n]} \sum_{i \in [k], y \in V_i} Z_x Q_B(V(x), i) p_B(i, y) \log \left( \frac{p_B(i, y)}{p_0(i, y)} \right). \end{aligned}$$

836 Now for every  $i \in [k]$ , by (15)

$$\begin{aligned} \sum_{y \in V_i} p_B(i, y) \log \left( \frac{p_B(i, y)}{p_0(i, y)} \right) &= \sum_{j \in [m]} \frac{1 + 3\varepsilon b_i(j)}{m} \log(1 + 3\varepsilon b_i(j)) \\ &\leq \sum_{j \in [m]} \left( 3\varepsilon b_i(j) + \frac{9\varepsilon^2 b_i(j)^2}{m} \right) \\ &\leq 9\varepsilon^2. \end{aligned}$$

837 The second line uses the inequality  $\log(1 + u) \leq u$ , the last line is the consequence of having  
 838  $\sum_j b_i(j) = 0$  and  $b_i(j)^2 \in \{0, 1\}$ . Summing over  $i$  we get

$$\text{KL}(\mathbb{P}_{P_B}, \mathbb{P}_{P_0}) \leq 9\varepsilon^2 \sum_{\epsilon \in [n]} Z_x$$

839 so all in all we deduce

$$\frac{1}{|\mathcal{B}_m^k|} \sum_{B \in \mathcal{B}_m^k} \mathbb{P}_{P_B} [\hat{B} \neq B] \geq 1 - \frac{9\varepsilon^2 (\sum_{x \in [n]} Z_x) + \log 2}{\log |\mathcal{B}_k|} \geq 1/2$$

840 if  $(\sum_{x \in [n]} Z_x) \leq \frac{\log(|\mathcal{B}_k|) - 2 \log 2}{18\varepsilon^2}$ . By Lemma 4  $\log |\mathcal{B}_m^k| \geq km/40 = n/40$  therefore if  $(\sum_{x \in [n]} Z_x) \geq$   
 841  $\frac{n/40 - 2 \log 2}{18\varepsilon^2}$  there exists no  $(\varepsilon, 1/2)$ -PAC estimator of  $\mathcal{P}_k^{(1)}$ . This proves the first statement.

842 The second statement is proved similarly: as above an  $(\varepsilon, \delta)$ -PAC estimator of  $\mathcal{P}_k^{(2)}$  necessarily yields  
 843 an  $(\varepsilon, \delta)$ -PAC estimator of  $B \in \mathcal{B}_k^k$ . Applying Fano's inequality with  $P_0$  the matrix with all entries  
 844 equal to  $1/n$ , we are now led to compute

$$\begin{aligned} \text{KL}(\mathbb{P}_{P_B}, \mathbb{P}_{P_0}) &= \sum_{x, y \in [n]} Z_x Q_B(V(x), V(y)) \frac{1}{m} \log \left( \frac{n Q_B(V(x), V(y))}{m} \right) \\ &= \sum_{i, j \in [k]} \sum_{x \in V_i} Z_x Q_B(i, j) \log(k Q_B(i, j)) \\ &= \sum_{i, j \in [k]} \sum_{x \in V_i} Z_x \frac{1 + 3\varepsilon b_i(j)}{k} \log(1 + 3\varepsilon b_i(j)) \end{aligned}$$

845 after which the proof follows the same arguments. □

## C Discussion and proof of Theorem 1

In this appendix we discuss limitations and possible extensions of our main result, Theorem 1, state a few key intermediate results used in the proof, and proceed to the proof.

### C.1 Discussion

**Control of the singular gap** We suggested that Theorem 1 requires in practice a large gap  $\Delta_r := \sigma_r - \sigma_{r+1}$ . From the obvious upper bound  $\Delta_r \leq \sigma_r$ , the best we can hope for is having  $\Delta_r \geq c\sigma_r$  with a constant  $c < 1$ . The following lemma shows that with bounded spectral recoverability we can always achieve  $\Delta_r \geq c\sigma_r^2$  up to a small look-ahead in the singular values.

**Lemma 6.** *Let  $A \in \mathbb{R}^{n \times m}$ . Then for all  $r$  there exists  $r' \geq r$  such that*

$$\sigma_{r'+1} \leq \left(1 - \frac{(1-1/e)\sigma_r}{3\xi(A)}\right) \sigma_{r'} \quad \text{and} \quad \sigma_{r'} \geq e^{-2}\sigma_r.$$

*Proof.* First we bound  $\sum_{i=1}^n \sigma_i \leq \xi(A)$ . Consider now  $r \in [n]$  and an arbitrary integer  $l \geq 1$ . If  $\sigma_{r+i+1} \geq (1-1/l)\sigma_{r+i}$  for all  $i \in [0, l-1]$  then

$$\begin{aligned} \sum_{i=1}^{r+l} \sigma_i &\geq (r-1)\sigma_r + \sigma_r \sum_{i=0}^l (1-1/l)^i \geq \sigma_r (r-1+l[1-(1-1/l)^{l+1}]) \\ &\geq \sigma_r (r-1+l(1-e^{-1})) \end{aligned}$$

where we used the bound  $(1-1/l)^{l+1} \leq e^{-1-1/l} \leq e^{-1}$ . We thus get a contradiction if the right hand side is larger than  $\xi(A)$ , which occurs if  $l \geq \frac{1}{1-1/e} \left( \frac{\xi(A)}{\sigma_r} - r + 1 \right)$ . Thus by taking  $l = \left\lceil \frac{2}{1-1/e} \frac{\xi(A)}{\sigma_r} \right\rceil$  there must exist  $i \leq l-1$  such that  $\sigma_{r+i+1} < (1-1/l)\sigma_{r+i}$ . From its expression we can bound  $l \leq \frac{3\xi(A)}{(1-1/e)\sigma_r}$ , while by taking the smallest possible  $i$  we also have

$$\sigma_{r+i} \geq (1-1/l)^l \sigma_r \geq e^{-2}\sigma_r,$$

noting that  $l \geq 2$  and using the inequality  $\log(1-u) \geq -u/2$  for  $u \leq 1/2$ .  $\square$

**Extension to non-recurrent Markov chains** Our result requires  $\nu$  to have full support and to have its density w.r.t. an invariant measure  $\nu_{\pi, \text{inv}}$  bounded from above and below. This apparently rules out absorbing chains, and more generally chains with transient states where invariant measures do not have full support. We argue however that our result could also be applied in that case by decomposing the chain adequately. We can decompose the state space  $\mathcal{X} = \bigcup_{i=1} \mathcal{R}_i \cup \bigcup_{j=1} \mathcal{T}_j$  into irreducible recurrent classes  $\mathcal{R}_i$  and irreducible transient classes  $\mathcal{T}_j$  (for all  $x, y \in \mathcal{T}_j$  there exists a path of positive probability entirely contained in  $\mathcal{T}_j$ , but the chain eventually leaves  $\mathcal{T}_j$ ) (see (6)). Our result could then be applied immediately on each  $\mathcal{R}_i$  by taking the corresponding invariant measure, but it could also be applied to  $\mathcal{T}_j$  as well. Indeed, an inspection of the proof reveals the only reason we require the invariant measure is to have contraction properties for  $P_\pi$  in  $\ell^p(\nu_{\pi, \text{inv}})$ , which holds if  $P_\pi^\dagger$  is substochastic and  $\nu$  is excessive, in the sense  $\nu P_\pi \geq \nu$  pointwise. On a recurrent class an excessive measure coincides with an invariant measure but on a transient class  $\mathcal{T}_j$  an excessive measure is a quasi-stationary measure (13), which describes the asymptotic behaviour of the chain conditioned to never leave  $\mathcal{T}_j$ . It can be obtained concretely as follows: restricting  $P_\pi$  to a transient class  $\mathcal{T}_j$  gives a substochastic matrix with non-negative entries, so we can still apply the Perron-Frobenius theorem. The first left eigenvector is the quasi-stationary measure we are looking for.

**Dependence in  $\nu$  and  $\nu_{\pi, \text{inv}}$**  We have already explained after Theorem 1 why we consider two measures:  $\nu$  is known by the practitioner and used to compute the SVD, while the invariant measure  $\nu_{\pi, \text{inv}}$  is more adapted to the analysis. Our proof makes use of a very rough comparison of the norms to relate the two and there is potentially room for improvement.

**Dependence in the policy  $\pi$**  The very core of our proof relies on a concentration inequality for  $\widehat{P} \in \mathbb{R}^{\mathcal{X} \times \mathcal{S}}$  (Theorem 8), which is independent of a policy. This is the key argument to obtain an off-policy result, which could also be used to make the result of Theorem 1 hold simultaneously over a set of policies (assuming for instance bounded density w.r.t. a reference policy). We are limited however by the invariance properties required for the measures, so we have preferred to state the result for a fixed policy only.



888 **Dependence in  $(1 - \gamma)^{-1}$**  Supposing that  $k \leq (1 - \gamma)^{-1}$ , our estimation error (2) has a dependence  
889 in  $(1 - \gamma)^{-2}$  – which means that the sample complexity of our algorithm for estimating the (shifted)  
890 successor measure with  $\varepsilon$ -accuracy scales as  $(1 - \gamma)^{-4}$ . This is probably sub-optimal, as learning  
891 an  $\varepsilon$ -optimal policies (in reward-specific RL) should have a sample complexity in  $(1 - \gamma)^{-3}$  (4).  
892 Further note that if one attempted to apply our result for the family of policies considered in a  
893 policy improvement scheme, we would typically require an additional factor  $(1 - \gamma)^{-1}$  in the sample  
894 complexity. From these observations, we conjecture that the sample complexity of estimating the  
895 (shifted) successor measure should scale as  $(1 - \gamma)^{-2}$ .

896 **Dependence on the uniformity of the measure** Our result also features a ratio  
897  $\max_{(s,a),(s',a') \in \mathcal{X}} \frac{\nu(s,a)}{\sum_{s',a'} \nu(s',a')}$  over all pairs  $(s,a), (s',a')$ . This forbids a highly heterogeneous  
898 measure but we believe this could be an artifact of the proof. For the most part of our argument, in  
899 particular for the concentration in spectral norm (Theorem 7), we are led to consider a ratio only over  
900 neighbouring pairs, i.e. such that  $P(s,a,s') > 0$ , which can be much smaller. The consideration of  
901 a ratio over all pairs come from a rough comparison between the  $2 - \infty$  and spectral norms in the  
902 leave-one-out analysis.

903 **Bound for the non-shifted successor measure** Finally we note that Theorem 1 can be used to  
904 derive a bound on the estimation error of  $M_\pi$  in  $\|\cdot\|_{\infty,\infty}$  norm:

$$\|[\widehat{M}_{\pi,k}]_r - M_\pi\|_{\infty,\infty} \leq C\mathcal{E}_{\text{estim}} + \mathcal{E}_{\text{approx}} + 2k\gamma. \quad (17)$$

905 This is based on (34, Lemma 24.6). Let  $X$  denote the chain with transition matrix  $P_\pi$  and let  
906  $T \sim \mathcal{G}(1 - \gamma)$  be a geometric variable independent of  $X$  taking values in  $\{0, 1, \dots\}$ . Note that  
907  $M_\pi = (1 - \gamma)\mathbb{E}[P_\pi^T]$  and  $M_{\pi,k} = (1 - \gamma)\mathbb{E}[P_\pi^{T+k}]$ . Then writing  $\|\mu - \nu\|_{TV}$  for the total variation  
908 distance between two measures  $\mu, \nu$ , it is simple to notice that

$$\begin{aligned} \|(1 - \gamma)M_{\pi,k} - (1 - \gamma)M_\pi\|_{\infty,\infty} &= 2 \max_{x \in \mathcal{X}} \|\mathbb{P}_x[X_T = \cdot] - \mathbb{P}_x[X_{T+k} = \cdot]\|_{TV} \\ &\leq 2 \|\mathbb{P}[T = \cdot] - \mathbb{P}[T + k = \cdot]\|_{TV} \\ &\leq 2k\gamma(1 - \gamma) \end{aligned}$$

909 by (34, Lemma 24.6).

## 910 C.2 Main steps of the proof of Theorem 1

911 The strategy to prove Theorem 1 consists in the following steps: we first prove concentration bounds  
912 for the simple estimator  $\widehat{M}_{\pi,k}$  in spectral norm and strengthen them to  $2 - \infty$  norm. We have summed  
913 up the main steps in the diagram of Figure 5.

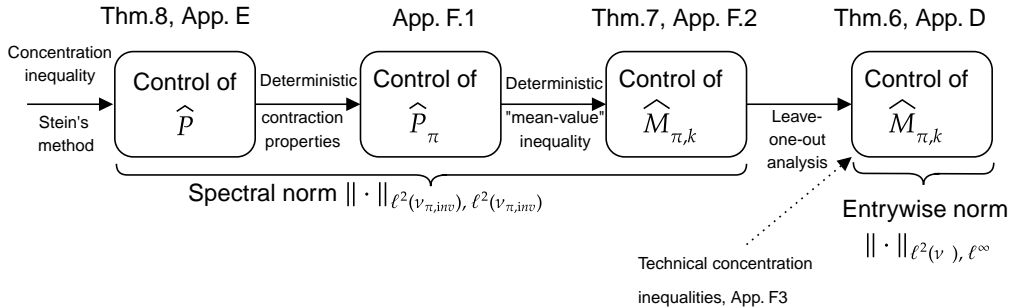

Figure 5: Main steps of the proof of Theorem 1.

914 We focus on the latter part of the proof first, i.e., obtaining bounds in entrywise norms from bounds  
915 in spectral norms. We state a general result for the estimation of a matrix, based on the so-called  
916 leave-one-out analysis (1). The proof is given in Appendix D.

917 **Theorem 6** (Leave-one-out analysis). *Let  $\nu$  a probability measure on  $[n]$  with full support,  $M, \widehat{M} \in$   
918  $\mathbb{R}^{n \times n}$  be positive semi-definite self-adjoint matrices w.r.t.  $\nu$  and  $E := \widehat{M} - M$ . Write  $M = U\Lambda U^\dagger$ ,*

919  $\widehat{M} = \widehat{U} \widehat{\Lambda} \widehat{V}$  for the eigendecompositions of  $M$  and  $\widehat{M}$  respectively. Let  $r \in [n]$ ,  $H_r = \widehat{U}_r^\dagger U_r$  and  
 920  $\Delta_r := \lambda_r(M) - \lambda_{r+1}(M)$ , with the convention that  $\lambda_{n+1}(M) := 0$ . Suppose there exist  $A, \varepsilon > 0$  such  
 921 that  $\|EU_r\|_{\ell^2(\nu), \ell^2(\nu)} \leq A\varepsilon$ ,  $\|EM\|_{\ell^2(\nu), \ell^\infty} \leq \varepsilon \|M\|_{\ell^2(\nu), \ell^\infty}$  and

$$\|E(\widehat{U}_r H_r - U_r)\|_{\ell^2(\nu), \ell^\infty} \leq \varepsilon \left( \|\widehat{U}_r H_r - U_r\|_{\ell^2(\nu), \ell^\infty} + \frac{A\varepsilon \|U_r\|_{\ell^2(\nu), \ell^\infty}}{\Delta_r} \right).$$

922 Then there exists a universal constant  $C > 0$  such that if  $\varepsilon \leq \Delta_r/4A$

$$\|\widehat{U}_r H_r - U_r\|_{\ell^2(\nu), \ell^\infty} \leq \frac{CA \|M\|_{\ell^2(\nu), \ell^\infty} \varepsilon}{|\lambda_r| \Delta_r} \quad (18)$$

923 and

$$\|[\widehat{M}]_r - [M]_r\|_{\ell^2(\nu), \ell^\infty} \leq \frac{CA |\lambda_1| \|M\|_{\ell^2(\nu), \ell^\infty} \varepsilon}{|\lambda_r| \Delta_r}. \quad (19)$$

924 The previous result requires several controls on the error matrix  $E$  in spectral norm. The bound  
 925 required on  $\|E\|_{\ell^2(\nu), \ell^2(\nu)}$  will be the consequence of the following, which is an analogue of Theorem  
 926 1 for spectral norm. Note that the underlying measure is here required to be invariant (we explain  
 927 how go back to an arbitrary measure  $\nu$  in the proof of Theorem 1).

928 **Theorem 7** (Concentration in spectral norm). *Let  $P \in \mathbb{R}^{\mathcal{X} \times \mathcal{S}}$  be the transition matrix of a finite*  
 929 *MDP. Let  $\mu$  be a probability measure on  $\mathcal{S}$ ,  $\pi$  a policy and  $\nu(s, a) := \mu(s)\pi(s, a)$ , which defines a*  
 930 *probability measure on the set  $\mathcal{X}$  of state-action pairs. Let  $k \geq 0$ ,  $\gamma \in (0, 1)$  and write*

$$C_{k, \gamma} := \frac{8 \max(k, (1 - \gamma)^{-1})}{1 - \gamma}.$$

931 For all policy  $\pi$ , for all  $t \geq 0$  if  $\nu$  is invariant for  $P_\pi$  then

$$\mathbb{P} \left[ \|\widehat{M}_{\pi, k} - M_{\pi, k}\|_{\ell^2(\nu), \ell^2(\nu)} \geq t \right] \leq 4n \exp \left( \frac{-t^2 \min_{(s, a) \sim (s', a')} \frac{Z_{s, a} \nu(s', a')}{\nu(s, a) + \nu(s', a')}}{8C_{k, \gamma}(t + 2C_{k, \gamma})} \right).$$

932 Recall that  $n$  denotes the cardinality of  $\mathcal{X}$ . The minimum is here over pairs  $(s, a), (s', a') \in \mathcal{X}$  such  
 933 that  $P(s, a, s') > 0$ .

934 The proof of Theorem 7 can be split in three main steps: we will first prove a concentration inequality  
 935 for  $\widehat{P}$  using Stein's method of exchangeable pairs (see Theorem 8 in Appendix E). We will then  
 936 extend this concentration result to  $\widehat{P}_\pi$  and  $\widehat{M}_{\pi, k}$  using deterministic arguments in Appendix F, where  
 937 we will also establish a set of technical concentration inequalities, gathered in the following lemma.

938 Given  $l \in [n]$ , let

$$\widehat{P}^{(l)} := \widehat{P} + \mathbb{1}_l P(l, \cdot) - \mathbb{1}_l \widehat{P}(l, \cdot), \quad (20)$$

939 where  $\mathbb{1}_l$  denotes the column vector with coordinates all equal to 0 except for the  $l$ -th, equal to  
 940 1, and  $P(l, \cdot)$  is the  $l$ -th row of  $P$ .  $\widehat{P}^{(l)}$  is the matrix obtained by replacing the estimation of the  
 941  $l$ -th row by the true value of the matrix  $P$ , so that  $\widehat{P}^{(l)} = \mathbb{E}[\widehat{P} \mid (Y_{s, a, s'})_{(s, a) \neq l, s'}]$ . We also write  
 942  $\widehat{M}_{\pi, k}^{(l)} := \widehat{P}_\pi^{(l)}(I - \gamma \widehat{P}_\pi^{(l)})^{-1}$ .

943 **Lemma 7** (Leave-one-out concentration). *Let  $P \in \mathbb{R}^{\mathcal{X} \times \mathcal{S}}$  be the transition matrix of a finite MDP,*  
 944  *$A \in \mathbb{R}^{\mathcal{S} \times \mathcal{P}}$ ,  $\pi$  be a policy and  $\nu, \rho$  be probability measures on  $\mathcal{X}, [\mathcal{P}]$  respectively. Suppose  $\nu$  is*  
 945 *invariant for  $P_\pi$ . For some universal constants  $C_1, C_2$  the following holds. Let  $k \geq 0$ ,  $\gamma \in [0, 1)$  and*

$$C_{k, \gamma} := \frac{C_1 \max(k, (1 - \gamma)^{-1})}{1 - \gamma}.$$

946 For all  $l \in [n]$ , and  $t \geq 0$  we have

$$\begin{aligned} \mathbb{P} \left[ \left\| \widehat{M}_{\pi,k}(l, \cdot) A - \widehat{M}_{\pi,k}^{(l)}(l, \cdot) A \right\|_{\ell^2(\rho)} \geq t \mid (Y_{s,a,s'})_{(s,a) \neq l, s'} \right] \\ \leq (k+2)(p+1) \exp \left( \frac{-t^2 Z_l}{C_{k,\gamma}^2 \|A\|_{\ell^2(\rho), \ell^\infty}^2} \right), \end{aligned} \quad (21)$$

$$\begin{aligned} \mathbb{P} \left[ \left\| \widehat{M}_{\pi,k} A - M_{\pi,k} A \right\|_{\ell^2(\rho), \ell^\infty} \geq t \right] \\ \leq n(k+2)(p+1) \exp \left( \frac{-t^2 Z_{\min}}{C_{k,\gamma}^2 \|A\|_{\ell^2(\rho), \ell^\infty}^2} \right), \end{aligned} \quad (22)$$

$$\begin{aligned} \mathbb{P} \left[ \left\| \widehat{M}_{\pi,k} A - \widehat{M}_{\pi,k}^{(l)} A \right\|_{\ell^2(\rho), \ell^2(\nu)} \geq t \right] \\ \leq (k+2)(p+1) \exp \left( \frac{-t^2 Z_l}{C_{k,\gamma}^2 \nu(l) \|A\|_{\ell^2(\rho), \ell^\infty}^2} \right) + C_2 k p n \exp \left( \frac{-\min_{i \sim j} \frac{Z_i \nu(j)}{\nu(i) + \nu(j)}}{C_{k,\gamma}^2} \right), \end{aligned} \quad (23)$$

$$\mathbb{P} \left[ \left\| \widehat{M}_{\pi,k}^{(l)} - M_{\pi,k} \right\|_{\ell^2(\nu), \ell^2(\nu)} \geq t \right] \leq 4n \exp \left( \frac{-t^2 \min_{i \sim j} \frac{Z_i \nu(j)}{\nu(i) + \nu(j)}}{8C_{k,\gamma} (t + 2C_{k,\gamma} \|P^\dagger\|_{\infty, \infty})} \right). \quad (24)$$

### 947 C.3 Proof of Theorem 1

948 We now apply the results of the previous subsection to the estimator of the shifted successor measure.  
949 Fix a policy  $\pi$ ,  $\gamma \in (0, 1)$ ,  $k \geq 0$  and  $M_{\pi,k} = P_\pi^k (I - \gamma P_\pi)^{-1}$ . Recall the estimator  $\widehat{M}_{\pi,k} :=$   
950  $\widehat{P}_\pi^k (I - \gamma \widehat{P}_\pi)^{-1}$ . Since the arguments require self-adjoint matrices let

$$M := \begin{pmatrix} 0 & M_{\pi,k} \\ M_{\pi,k}^\dagger & 0 \end{pmatrix}, \quad \widehat{M} := \begin{pmatrix} 0 & \widehat{M}_{\pi,k} \\ \widehat{M}_{\pi,k}^\dagger & 0 \end{pmatrix} \quad (25)$$

951 and write  $E := \widehat{M} - M$ . Let  $(\sigma_i)_{i=1}^n, (\widehat{\sigma}_i)_{i=1}^n$  be the singular values of  $M_{\pi,k}$  and  $\widehat{M}_{\pi,k}$  arranged in non-  
952 increasing order, and  $M = U \Sigma U^\dagger, \widehat{M} = \widehat{U} \widehat{\Sigma} \widehat{U}^\dagger$  be the eigendecompositions of  $M, \widehat{M}$ , corresponding  
953 to eigenvalues  $(\lambda_i)_{i=1}^{2n}, (\widehat{\lambda}_i)_{i=1}^{2n}$  arranged in non-increasing order of absolute values. These are related  
954 as  $\lambda_{2i-1} = \sigma_i, \lambda_{2i} = -\sigma_i$  for all  $i \in [n]$ . We need thus to truncate the eigendecomposition of  $M$  and  
955  $\widehat{M}$  to rank  $2r$ , however for notational simplicity, we write  $r$  in subscripts instead of  $2r$  except for  
956  $|\lambda_{2r}|$ , but this is  $\sigma_r$  by what precedes.

957 *Proof of Theorem 1.* In this proof we write  $a \lesssim b$  if there exists a universal constant  $C > 0$  such that  
958  $a \leq Cb$ . Set

$$\varepsilon := \frac{\max(k, (1-\gamma)^{-1})}{1-\gamma} \sqrt{\max_{\substack{(s,a) \\ (s',a') \in \mathcal{X}}} \frac{\nu_{\pi, \text{inv}}(s, a)}{Z_{s',a'} \nu_{\pi, \text{inv}}(s', a')} \log(krn/\delta)} \quad (26)$$

959 Our goal is to apply Theorem 6 with  $\widehat{M}$ . We thus need to control  $\|E\|_{\ell^2(\nu), \ell^2(\nu)}, \|EM\|_{\ell^2(\nu), \ell^\infty}$  and  
960  $\|E(\widehat{U}_r H_r - U_r)\|_{\ell^2(\nu), \ell^\infty}$ , which we will bound using Theorem 7 and Lemma 7. Note however these  
961 only provide bounds in spectral norm with respect to  $\nu_{\pi, \text{inv}}$ , while we need a control with respect to  
962  $\nu$ . We address this issue with a rough comparison of norms: for all  $f \in \mathbb{R}^n$ , we have

$$\|f\|_{\ell^2(\nu)}^2 \leq \left\| \frac{d\nu}{d\nu_{\pi, \text{inv}}} \right\|_\infty \|f\|_{\ell^2(\nu_{\pi, \text{inv}})}^2, \quad \|f\|_{\ell^2(\nu_{\pi, \text{inv}})}^2 \leq \left\| \frac{d\nu_{\pi, \text{inv}}}{d\nu} \right\|_\infty \|f\|_{\ell^2(\nu)}^2$$

963 which in turn implies the comparisons of matrix norms

$$\|B\|_{\ell^2(\nu), \ell^2(\nu)} \leq \sqrt{\left\| \frac{d\nu}{d\nu_{\pi, \text{inv}}} \right\|_\infty \left\| \frac{d\nu_{\pi, \text{inv}}}{d\nu} \right\|_\infty} \|B\|_{\ell^2(\nu_{\pi, \text{inv}}), \ell^2(\nu_{\pi, \text{inv}})} \quad (27)$$

964 and

$$\|B\|_{\ell^2(\nu), \ell^\infty} \leq \sqrt{\left\| \frac{d\nu_{\pi, \text{inv}}}{d\nu} \right\|_\infty} \|B\|_{\ell^2(\nu_{\pi, \text{inv}}), \ell^\infty}, \quad (28)$$

$$\|B\|_{\ell^2(\nu_{\pi, \text{inv}}), \ell^\infty} \leq \sqrt{\left\| \frac{d\nu}{d\nu_{\pi, \text{inv}}} \right\|_\infty} \|B\|_{\ell^2(\nu), \ell^\infty}, \quad (29)$$

965 for all matrix  $B$ . Write  $A := \sqrt{\left\| \frac{d\nu}{d\nu_{\pi, \text{inv}}} \right\|_\infty \left\| \frac{d\nu_{\pi, \text{inv}}}{d\nu} \right\|_\infty}$ . Thus up to a factor  $A$ , we can use the  
 966 concentration inequalities in spectral norms with respect to  $\nu_{\pi, \text{inv}}$ . Note the maximum over all pairs  
 967  $(s, a)$  in the definition of  $\varepsilon$  (26) upper bounds the maximum over neighbouring pairs in Theorem 7.  
 968 Thus if the values  $Z_{s,a}$  are sufficiently large to make  $\varepsilon \leq 1$  the theorem and (27) show that

$$\|E\|_{\ell^2(\nu_{\pi, \text{inv}}), \ell^2(\nu_{\pi, \text{inv}})} \lesssim \varepsilon, \quad \|E\|_{\ell^2(\nu), \ell^2(\nu)} \lesssim A\varepsilon \quad (30)$$

969 with probability at least  $1 - \delta$ .

970 Similarly Equation 22 of Lemma 7 shows that with probability at least  $1 - \delta$  we have

$$\|EM\|_{\ell^2(\nu), \ell^\infty} \lesssim \|M\|_{\ell^2(\nu), \ell^\infty} \varepsilon.$$

971 Finally we claim that with probability at least  $1 - \delta$

$$\|E(\widehat{U}_r H_r - U_r)\|_{\ell^2(\nu), \ell^\infty} \lesssim \varepsilon \left( \|\widehat{U}_r H_r - U_r\|_{\ell^2(\nu), \ell^\infty} + \frac{A\varepsilon}{\Delta_r} \|U_r\|_{\ell^2(\nu), \ell^\infty} \right). \quad (31)$$

972 From Theorem 6 and a union bound this will be sufficient to get that

$$\|[\widehat{M}_{\pi, k}]_r - [M_{\pi, k}]_r\|_{\ell^2(\nu), \infty} \lesssim \frac{A\sigma_1 \|M\|_{\ell^2(\nu), \ell^\infty} \varepsilon}{\sigma_r(\sigma_r - \sigma_{r+1})}.$$

973 with probability  $1 - \delta$ . Theorem 1 follows from observing that  $\|M\|_{\ell^2(\nu), \ell^\infty} =$   
 974  $\max \left( \|M_{\pi, k}\|_{\ell^2(\nu), \ell^\infty}, \|M_{\pi, k}^\dagger\|_{\ell^2(\nu), \ell^\infty} \right)$ , that  $\nu_{\pi, \text{inv}}$  in the definition of  $\varepsilon$  (26) can be replaced by  $\nu$   
 975 at the cost of an additional factor  $A$ , and using Lemma 1 for the approximation error.

976 *Proof of the claim (31).* We now prove the claim. Given  $l \geq 1$ , recall the definition of  $\widehat{P}^{(l)}$  in (20) and  
 977 let  $\widehat{M}^{(l)}, \widehat{U}_r^{(l)}$ , etc. be the matrices obtained as their general counterparts  $\widehat{M}, \widehat{U}_r$ , etc. but using  $\widehat{P}^{(l)}$   
 978 instead of  $\widehat{P}$ . First we use triangle inequality to bound

$$\begin{aligned} \|E(\widehat{U}_r H_r - U_r)\|_{\ell^2(\nu), \ell^\infty} &= \max_{l \in [n]} \|E(l, \cdot)(\widehat{U}_r H_r - U_r)\|_{\ell^2(\nu)} \\ &\leq \max_{l \in [n]} \|E(l, \cdot)(\widehat{U}_r H_r - \widehat{U}_r^{(l)} H_r^{(l)})\|_{\ell^2(\nu)} \\ &\quad + \max_{l \in [n]} \|E(l, \cdot)(\widehat{U}_r^{(l)} H_r^{(l)} - U_r)\|_{\ell^2(\nu)}. \end{aligned}$$

979 The first term is bounded as

$$\begin{aligned} \|E(l, \cdot)(\widehat{U}_r H_r - \widehat{U}_r^{(l)} H_r^{(l)})\|_{\ell^2(\nu)} &\leq \|\mathbb{1}_l^\top E\|_{\ell^2(\nu_{\pi, \text{inv}})} \|\widehat{U}_r H_r - \widehat{U}_r^{(l)} H_r^{(l)}\|_{\ell^2(\nu), \ell^2(\nu_{\pi, \text{inv}})} \\ &\leq \nu_{\pi, \text{inv}}(l)^{-1/2} \|E\|_{\ell^2(\nu_{\pi, \text{inv}}), \ell^2(\nu_{\pi, \text{inv}})} \\ &\quad \times \|\widehat{U}_r H_r - \widehat{U}_r^{(l)} H_r^{(l)}\|_{\ell^2(\nu), \ell^2(\nu_{\pi, \text{inv}})} \\ &\lesssim \nu_{\pi, \text{inv}}(l)^{-1/2} \varepsilon \|\widehat{U}_r H_r - \widehat{U}_r^{(l)} H_r^{(l)}\|_{\ell^2(\nu), \ell^2(\nu_{\pi, \text{inv}})} \quad (32) \end{aligned}$$

980 with probability at least  $1 - \delta$ , where in the second inequality we used (8).

981 On the other hand since  $(\widehat{U}_r^{(l)} H_r^{(l)} - U_r)$  is independent of  $Y_{l, \cdot}$ . Equation 21 of Lemma 7 proves that  
 982 conditional on  $(Y_{s,a,s'})_{(s,a) \neq l, s'}$ , with probability at least  $1 - \delta$

$$\|E(l, \cdot)(\widehat{U}_r^{(l)} H_r^{(l)} - U_r)\|_{\ell^2(\nu)} \leq \varepsilon \|\widehat{U}_r^{(l)} H_r^{(l)} - U_r\|_{\ell^2(\nu), \ell^\infty}. \quad (33)$$

983 The latter norm is bounded as

$$\begin{aligned}
\|\widehat{U}_r^{(l)} H_r^{(l)} - U_r\|_{\ell^2(\nu), \ell^\infty} &\leq \|\widehat{U}_r^{(l)} H_r^{(l)} - \widehat{U}_r H_r\|_{\ell^2(\nu), \ell^\infty} + \|\widehat{U}_r H_r - U_r\|_{\ell^2(\nu), \ell^\infty} \\
&\leq \nu_{\pi, \text{inv}}^{-1/2} \min \|\widehat{U}_r^{(l)} H_r^{(l)} - \widehat{U}_r H_r\|_{\ell^2(\nu), \ell^2(\nu_{\pi, \text{inv}})} \\
&\quad + \|\widehat{U}_r H_r - U_r\|_{\ell^2(\nu), \ell^\infty}.
\end{aligned} \tag{34}$$

984 We are thus left with bounding

$$\begin{aligned}
\|\widehat{U}_r^{(l)} H_r^{(l)} - \widehat{U}_r H_r\|_{\ell^2(\nu), \ell^2(\nu_{\pi, \text{inv}})} &= \|\widehat{U}_r^{(l)} \widehat{U}_r^{(l)\dagger} U_r - \widehat{U}_r \widehat{U}_r^\dagger U_r\|_{\ell^2(\nu), \ell^2(\nu_{\pi, \text{inv}})} \\
&\leq \|\widehat{U}_r^{(l)} \widehat{U}_r^{(l)\dagger} - \widehat{U}_r \widehat{U}_r^\dagger\|_{\ell^2(\nu), \ell^2(\nu_{\pi, \text{inv}})} \|U_r\|_{\ell^2(\nu), \ell^2(\nu)} \\
&= \|\widehat{U}_r^{(l)} \widehat{U}_r^{(l)\dagger} - \widehat{U}_r \widehat{U}_r^\dagger\|_{\ell^2(\nu), \ell^2(\nu_{\pi, \text{inv}})} \\
&\leq \left\| \frac{d\nu_{\pi, \text{inv}}}{d\nu} \right\|_\infty^{1/2} \|\widehat{U}_r^{(l)} \widehat{U}_r^{(l)\dagger} - \widehat{U}_r \widehat{U}_r^\dagger\|_{\ell^2(\nu), \ell^2(\nu)}.
\end{aligned}$$

985 From the Davis-Kahan inequality (Prop. 7)

$$\begin{aligned}
\|\widehat{U}_r^{(l)} \widehat{U}_r^{(l)\dagger} - \widehat{U}_r \widehat{U}_r^\dagger\|_{\ell^2(\nu), \ell^2(\nu)} &\leq \frac{2 \left\| (\widehat{M} - \widehat{M}^{(l)}) \widehat{U}_r^{(l)} \right\|_{\ell^2(\nu), \ell^2(\nu)}}{\widehat{\sigma}_r^{(l)} - \widehat{\sigma}_{r+1}^{(l)}} \\
&\leq \frac{2 \left\| \frac{d\nu}{d\nu_{\pi, \text{inv}}} \right\|_\infty^{1/2} \left\| (\widehat{M} - \widehat{M}^{(l)}) \widehat{U}_r^{(l)} \right\|_{\ell^2(\nu), \ell^2(\nu_{\pi, \text{inv}})}}{\widehat{\sigma}_r^{(l)} - \widehat{\sigma}_{r+1}^{(l)}}.
\end{aligned}$$

986 By Weyl's inequality (38) for all  $i \in [n]$  we have  $|\widehat{\sigma}_i^{(l)} - \sigma_i| \leq \|\widehat{M}^{(l)} - M\|_{\ell^2(\nu), \ell^2(\nu)}$ , which is  
987 below  $A\varepsilon$  up to a constant factor with probability at least  $1 - \delta$  by (24) of Lemma 7. Hence  
988  $(\widehat{\sigma}_r^{(l)} - \widehat{\sigma}_{r+1}^{(l)})^{-1} \leq 2\Delta_r^{-1}$  if  $A\varepsilon \leq \Delta_r/2$ , and so we can bound

$$\|\widehat{U}_r^{(l)} H_r^{(l)} - \widehat{U}_r H_r\|_{\ell^2(\nu), \ell^2(\nu_{\pi, \text{inv}})} \lesssim \frac{A \left\| (\widehat{M} - \widehat{M}^{(l)}) \widehat{U}_r^{(l)} \right\|_{\ell^2(\nu), \ell^2(\nu_{\pi, \text{inv}})}}{\Delta_r}.$$

989 Now comes the point where we use that the maximum in the definition of  $\varepsilon$  involves all pairs  $x, x' \in \mathcal{X}$ :  
990 it has the consequence that

$$\max_{x, x' \in \mathcal{X}} \left( \frac{\nu_{\pi, \text{inv}}(x) + \nu_{\pi, \text{inv}}(x')}{Z_x \nu_{\pi, \text{inv}}(x')} \right) \frac{Z_l \nu_{\pi, \text{inv}, \min}}{\nu_{\pi, \text{inv}}(l)} \geq 1.$$

991 Therefore these term compensate each other when taking  $t = \varepsilon \nu_{\pi, \text{inv}, \min}^{1/2}$  in Equation (23) of Lemma  
992 7 which thus implies

$$\left\| (\widehat{M} - \widehat{M}^{(l)}) \widehat{U}_r^{(l)} \right\|_{\ell^2(\nu), \ell^2(\nu_{\pi, \text{inv}})} \lesssim \varepsilon \nu_{\pi, \text{inv}, \min}^{1/2} \|\widehat{U}_r^{(l)}\|_{\ell^2(\nu), \ell^\infty}$$

993 with probability at least  $1 - \delta$ . Then using Lemma 8 we bound

$$\begin{aligned}
\|\widehat{U}_r^{(l)}\|_{\ell^2(\nu), \ell^\infty} &\leq 2 \|\widehat{U}_r^{(l)} H_r^{(l)}\|_{\ell^2(\nu), \ell^\infty} \\
&\leq 2 \|\widehat{U}_r^{(l)} H_r^{(l)} - U_r\|_{\ell^2(\nu), \ell^\infty} + 2 \|U_r\|_{\ell^2(\nu), \ell^\infty}.
\end{aligned}$$

994 Combining the previous these inequalities we get

$$\nu_{\pi, \text{inv}, \min}^{-1/2} \|\widehat{U}_r^{(l)} H_r^{(l)} - \widehat{U}_r H_r\|_{\ell^2(\nu), \ell^2(\nu_{\pi, \text{inv}})} \lesssim \frac{A\varepsilon}{\Delta_r} \left( \|\widehat{U}_r^{(l)} H_r^{(l)} - U_r\|_{\ell^2(\nu), \ell^\infty} + \|U_r\|_{\ell^2(\nu), \ell^\infty} \right) \tag{35}$$

995 and plugging this in (34) yields

$$\|\widehat{U}_r^{(l)} H_r^{(l)} - U_r\|_{\ell^2(\nu), \ell^\infty} \lesssim \frac{A\varepsilon}{\Delta_r} \left( \|\widehat{U}_r^{(l)} H_r^{(l)} - U_r\|_{\ell^2(\nu), \ell^\infty} + \|U_r\|_{\ell^2(\nu), \ell^\infty} \right) + \|\widehat{U}_r H_r - U_r\|_{\ell^2(\nu), \ell^\infty}. \tag{36}$$

996 so if  $A\varepsilon/\Delta_r$  is sufficiently small regrouping the two identical terms yields

$$\|\widehat{U}_r^{(l)} H_r^{(l)} - U_r\|_{\ell^2(\nu), \ell^\infty} \lesssim \|\widehat{U}_r H_r - U_r\|_{\ell^2(\nu), \ell^\infty} + \frac{A\varepsilon}{\Delta_r} \|U_r\|_{\ell^2(\nu), \ell^\infty}. \quad (37)$$

997 Plugging this back in (35) we get that

$$\begin{aligned} \nu_{\pi, \text{inv}}^{-1/2} \|\widehat{U}_r^{(l)} H_r^{(l)} - \widehat{U}_r H_r\|_{\ell^2(\nu), \ell^2(\nu_{\pi, \text{inv}})} &\lesssim \frac{A\varepsilon}{\Delta_r} \|\widehat{U}_r H_r - U_r\|_{\ell^2(\nu), \ell^\infty} + \left( \frac{A\varepsilon}{\Delta_r} + \frac{A^2 \varepsilon^2}{\Delta_r^2} \right) \|U_r\|_{\ell^2(\nu), \ell^\infty} \\ &\lesssim \frac{A\varepsilon}{\Delta_r} \left( \|\widehat{U}_r H_r - U_r\|_{\ell^2(\nu), \ell^\infty} + \|U_r\|_{\ell^2(\nu), \ell^\infty} \right). \end{aligned}$$

998 All in all combining (32) and (33)  $\|E(\widehat{U}_r H_r - U_r)\|_{\ell^2(\nu), \ell^\infty}$  is upper bounded by  $\varepsilon$  times the latter  
999 equation +  $\varepsilon \times$  (37), so we obtain

$$\begin{aligned} \|E(\widehat{U}_r H_r - U_r)\|_{\ell^2(\nu), \ell^\infty} &\lesssim \frac{A\varepsilon^2}{\Delta_r} \left( \|\widehat{U}_r H_r - U_r\|_{\ell^2(\nu), \ell^\infty} + \|U_r\|_{\ell^2(\nu), \ell^\infty} \right) \\ &\quad + \varepsilon \left( \|\widehat{U}_r H_r - U_r\|_{\ell^2(\nu), \ell^\infty} + \frac{A\varepsilon}{\Delta_r} \|U_r\|_{\ell^2(\nu), \ell^\infty} \right) \\ &\lesssim \varepsilon \left( \|\widehat{U}_r H_r - U_r\|_{\ell^2(\nu), \ell^\infty} + \frac{A\varepsilon}{\Delta_r} \|U_r\|_{\ell^2(\nu), \ell^\infty} \right). \end{aligned}$$

1000 using that  $A\varepsilon \leq \Delta_r/2$ , which proves the claim.

1001

□

## D Entry-wise guarantees: leave-one-out analysis

In this appendix we prove Theorem 6. The argument is based on the *leave-one-out* analysis introduced by Abbe & al (1), but our proofs are more aligned with the monograph (12). Overall, Theorem 6 is obtained after a few modifications in the proof of (12, Theorem 4.4). In all this section, we consider  $\nu$  to be a probability measure on  $[n]$  which for simplicity will be omitted from notation. The norms  $\|\cdot\|$  with no subscript at all refer to the spectral norm  $\|\cdot\|_{2,2}$ .

### D.1 Entry-wise guarantees for SVD estimation: proof of Theorem 6

The theorem will be the consequence of the two following propositions. We use the same setup and notations as for Theorem 6. We recall that  $H_r = \widehat{U}_r^\dagger U_r$ .

**Proposition 5.** *Provided  $\|EU_r\| \leq \Delta_r/2$ , we have*

$$\begin{aligned} \|\widehat{U}_r H_r - U_r\|_{2,\infty} &\leq \frac{\|EM\|_{2,\infty}}{|\lambda_r|^2} \left(1 + \frac{4\|EU_r\|}{|\lambda_r|}\right) + \frac{4\|M\|_{2,\infty}\|EU_r\|}{|\lambda_r|} \left(\frac{1}{|\lambda_r|} + \frac{1}{\Delta_r}\right) \\ &\quad + \frac{2\|E(\widehat{U}_r H_r - U_r)\|_{2,\infty}}{|\lambda_r|}. \end{aligned}$$

The following proposition shows how the control of the eigenspace via  $\widehat{U}_r H_r - U_r$  implies a control on the matrix  $[\widehat{M}]_r$  itself for the two-to-infinity norm.

**Proposition 6.** *Provided  $\|EU_r\| \leq \Delta_r/8$ ,*

$$\|[\widehat{M}]_r - [M]_r\|_{2,\infty} \leq \frac{5}{2} |\lambda_1| \|\widehat{U}_r H_r - U_r\|_{2,\infty} + 4\|M\|_{2,\infty}\|EU_r\| \left(2\Delta_r^{-1} + |\lambda_r|^{-1}\right).$$

*Proof of Theorem 6.* Use Proposition 5 and the assumptions to bound  $\|EU_r\| \leq \|E\| \leq A\varepsilon$  and

$$\begin{aligned} \|\widehat{U}_r H_r - U_r\|_{2,\infty} &\leq \frac{\varepsilon\|M\|_{2,\infty}}{|\lambda_r|^2} \left(1 + \frac{4A\varepsilon}{|\lambda_r|}\right) + \frac{4A\|M\|_{2,\infty}\varepsilon}{|\lambda_r|} \left(\frac{1}{|\lambda_r|} + \frac{1}{\Delta_r}\right) \\ &\quad + \frac{2\varepsilon}{|\lambda_r|} \left(\|\widehat{U}_r H_r - U_r\|_{2,\infty} + \frac{A\varepsilon\|U_r\|_{2,\infty}}{\Delta_r}\right). \end{aligned}$$

If  $\varepsilon \leq \Delta_r/4$  then  $2\varepsilon \leq |\lambda_r|/2$  so we can rearrange terms to obtain

$$\begin{aligned} \|\widehat{U}_r H_r - U_r\|_{2,\infty} &\leq \frac{2\varepsilon\|M\|_{2,\infty}}{|\lambda_r|^2} \left(1 + \frac{4A\varepsilon}{|\lambda_r|}\right) + \frac{8A\|M\|_{2,\infty}\varepsilon}{|\lambda_r|} \left(\frac{1}{|\lambda_r|} + \frac{1}{\Delta_r}\right) \\ &\quad + \frac{4A\varepsilon^2\|U_r\|_{2,\infty}}{\Delta_r|\lambda_r|}. \end{aligned}$$

Then use the crude bound  $\|U_r\|_{2,\infty} \leq \lambda_r^{-1} \|U_r \Lambda_r\|_{2,\infty} = |\lambda_r|^{-1} \|M\|_{2,\infty}$ . Keeping only the dominant term in the right-hand side and plugging this bound in Proposition 6 yields the results.  $\square$

### D.2 Technical lemmas

We now prove Propositions 5 and 6. We start by gathering three basic results that will be used in the proofs. The first one is Weyl's inequality, which states that for all matrices  $\widehat{M}, M \in \mathbb{R}^{n \times n}$ , for all  $i \in [n]$ ,

$$|\lambda_i(M) - \lambda_i(\widehat{M})| \leq \|M - \widehat{M}\|. \quad (38)$$

Then we recall the classical Davis-Kahan inequalities. We refer to Corollary 2.8 of (12) for a proof.

**Proposition 7** (Davis-Kahan inequality). *For all  $r \in [n]$ , if  $\|\widehat{M} - M\| \leq \Delta_r/2$  then*

$$\|\widehat{U}_{>r}^\dagger U_r\| = \|\widehat{U}_r \widehat{U}_r^\dagger - U_r U_r^\dagger\| \leq \frac{2\|(\widehat{M} - M)U_r\|}{\Delta_r}.$$

1025 Finally we will need one more lemma. Given a matrix  $A$  with singular value decomposition  
 1026  $A = U\Sigma V^\dagger$ , define  $\text{sgn}(A) := UV^\dagger$ .

1027 **Lemma 8** ((12, Lemma 4.15)). For all  $r \geq 1$ ,

$$\|H_r - \text{sgn}(H_r)\| \leq \frac{2\|E\|^2}{\Delta_r^2} \quad (39)$$

1028 Furthermore if  $\|E\| \leq \Delta_r/2$ , then

$$\|H_r^{-1}\| \leq 2. \quad (40)$$

1029 We can now move to the proof of Propositions 5 and 6. The following lemma is taken from Lemma  
 1030 4.16 of (12) and is an intermediate step towards Proposition 5. The only difference is that we do not  
 1031 assume  $M$  to be of rank  $r$ , but this has no consequence on the proof.

1032 **Lemma 9.** (12)[Lemma 4.16] Provided  $\|E\| \leq \Delta_r/2$ ,

$$\|\widehat{U}_r H_r - \widehat{M} U_r \Lambda_r^{-1}\|_{2,\infty} \leq \frac{2\|\widehat{M}(\widehat{U}_r H_r - U_r)\|_{2,\infty}}{|\lambda_r|} + \frac{4\|\widehat{M} U_r\|_{2,\infty} \|EU_r\|}{|\lambda_r|^2}$$

1033 and

$$\|\widehat{U}_r H_r - U_r\|_{2,\infty} \leq \frac{2\|\widehat{M}(\widehat{U}_r H_r - U_r)\|_{2,\infty}}{|\lambda_r|} + \frac{4\|\widehat{M} U_r\|_{2,\infty} \|EU_r\|}{|\lambda_r|^2} + \frac{\|EU_r\|_{2,\infty}}{|\lambda_r|}. \quad (41)$$

### 1034 D.3 Proof of Propositions 5 and 6

1035 *Proof of Proposition 5.* The proposition is a simple continuation of Lemma 9. The first term of (41)  
 1036 is bounded using triangle inequality

$$\begin{aligned} \|\widehat{M}(\widehat{U}_r H_r - U_r)\|_{2,\infty} &\leq \|M(\widehat{U}_r H_r - U_r)\|_{2,\infty} + \|E(\widehat{U}_r H_r - U_r)\|_{2,\infty} \\ &\leq \|M\|_{2,\infty} \|(\widehat{U}_r H_r - U_r)\| + \|E(\widehat{U}_r H_r - U_r)\|_{2,\infty}. \end{aligned}$$

1037 Since  $U_r^\dagger U_r = I$ , one can notice that

$$\begin{aligned} \|\widehat{U}_r H_r - U_r\| &= \|\widehat{U}_r \widehat{U}_r^\dagger U_r - U_r\| \\ &= \|(\widehat{U}_r \widehat{U}_r^\dagger - U_r U_r^\dagger) U_r\| \\ &\leq \|\widehat{U}_r \widehat{U}_r^\dagger - U_r U_r^\dagger\|. \end{aligned}$$

1038 Using the Davis-Kahan inequality (Prop. 7) we can thus bound

$$\|\widehat{M}(\widehat{U}_r H_r - U_r)\|_{2,\infty} \leq \frac{2\|M\|_{2,\infty} \|EU_r\|}{\Delta_r} + \|E(\widehat{U}_r H_r - U_r)\|_{2,\infty}. \quad (42)$$

1039 Similarly the second term of (41) is bounded as

$$\begin{aligned} \|\widehat{M} U_r\|_{2,\infty} &\leq \|M U_r\|_{2,\infty} + \|E U_r\|_{2,\infty} \\ &\leq \|M\|_{2,\infty} + \|E U_r\|_{2,\infty}. \end{aligned} \quad (43)$$

1040 Finally we bound  $\|EU_r\|_{2,\infty} \leq |\lambda_r|^{-1} \|EU_r \Lambda_r\|_{2,\infty} \leq |\lambda_r|^{-1} \|EM\|_{2,\infty}$ , so combining (41) with (42)  
 1041 and (43) yields the result.  $\square$

1042 *Proof of Proposition 6.* Using the SVD decompositions of  $\widehat{M}$  and  $M$ ,

$$\begin{aligned} [\widehat{M}]_r - [M]_r &= \widehat{U}_r \widehat{\Lambda}_r \widehat{U}_r^\dagger - U_r \Lambda_r U_r^\dagger \\ &= \widehat{U}_r (\widehat{\Lambda}_r - H_r \Lambda_r H_r^\dagger) \widehat{U}_r^\dagger + \widehat{U}_r H_r \Lambda_r H_r^\dagger \widehat{U}_r^\dagger - U_r \Lambda_r U_r^\dagger. \end{aligned} \quad (44)$$



1043 **Bounding**  $\widehat{U}_r (\widehat{\Lambda}_r - H_r \Lambda_r H_r^\dagger) \widehat{U}_r^\dagger$ : Using  $MU_r = U_r \Lambda_r$  and  $\widehat{U}_r^\dagger \widehat{M} = \widehat{\Lambda}_r \widehat{U}_r^\dagger$

$$\begin{aligned} H_r \Lambda_r H_r^\dagger &= \widehat{U}_r^\dagger U_r \Lambda_r H_r^\dagger = \widehat{U}_r^\dagger M U_r H_r^\dagger = \widehat{U}_r^\dagger (\widehat{M} + E) U_r H_r^\dagger \\ &= \widehat{\Lambda}_r H_r H_r^\dagger + \widehat{U}_r^\dagger E U_r H_r^\dagger \end{aligned}$$

1044 and thus  $\widehat{U}_r (\widehat{\Lambda}_r - H_r \Lambda_r H_r^\dagger) \widehat{U}_r^\dagger = \widehat{U}_r \widehat{\Lambda}_r (I - H_r H_r^\dagger) \widehat{U}_r^\dagger + \widehat{U}_r \widehat{U}_r^\dagger E U_r H_r^\dagger \widehat{U}_r^\dagger$ . Then note

$$\begin{aligned} \|\widehat{U}_r \widehat{\Lambda}_r\|_{2,\infty} &= \|[\widehat{M}]_r \widehat{U}_r\|_{2,\infty} \\ &\leq \|[\widehat{M}]_r - [M]_r\|_{2,\infty} + \|M\|_{2,\infty} \end{aligned}$$

1045 and in particular

$$\|\widehat{U}_r\|_{2,\infty} = \|\widehat{U}_r \widehat{\Lambda}_r \widehat{\Lambda}_r^{-1}\|_{2,\infty} \leq \widehat{\lambda}_r^{-1} (\|[\widehat{M}]_r - [M]_r\|_{2,\infty} + \|M\|_{2,\infty}).$$

1046 Thus we can bound

$$\begin{aligned} \|\widehat{U}_r (\widehat{\Lambda}_r - H_r \Lambda_r H_r^\dagger) \widehat{U}_r^\dagger\|_{2,\infty} &\leq \|\widehat{U}_r \widehat{\Lambda}_r\|_{2,\infty} \|I - H_r H_r^\dagger\| + \|\widehat{U}_r\|_{2,\infty} \|\widehat{U}_r^\dagger E U_r H_r^\dagger \widehat{U}_r^\dagger\| \\ &\leq (\|[\widehat{M}]_r - [M]_r\|_{2,\infty} + \|M\|_{2,\infty}) (\|I - H_r H_r^\dagger\| + \widehat{\lambda}_r^{-1} \|E U_r\|) \end{aligned}$$

1047 By the Davis-Kahan inequality (Prop. 7)

$$\|I - H_r H_r^\dagger\| = \|\widehat{U}_r^\dagger U_{>r}\|^2 \leq \frac{4 \|E U_r\|^2}{\Delta_r^2}.$$

1048 Then if  $\|E\| \leq \Delta_r/2$ , Weyl's inequality implies  $\widehat{\lambda}_r \geq \lambda_r - \|E\| \geq \lambda_r/2$  and we can bound

$$\|\widehat{U}_r (\widehat{\Lambda}_r - H_r \Lambda_r H_r^\dagger) \widehat{U}_r^\dagger\|_{2,\infty} \leq 2 (\|[\widehat{M}]_r - [M]_r\|_{2,\infty} + \|M\|_{2,\infty}) \|E U_r\| (\Delta_r^{-1} + \lambda_r^{-1}).$$

1049 If furthermore  $\|E U_r\| \leq \Delta_r/8$  we can make the factor in front of  $\|[\widehat{M}]_r - [M]_r\|_{2,\infty}$  smaller than

1050  $1/2$  so by rearranging terms from (44) we get

$$\|[\widehat{M}]_r - [M]_r\|_{2,\infty} \leq 4 \|M\|_{2,\infty} \|E U_r\| (\Delta_r^{-1} + \widehat{\lambda}_r^{-1}) + 2 \|\widehat{U}_r H_r \Lambda_r H_r^\dagger \widehat{U}_r^\dagger - U_r \Lambda_r U_r^\dagger\|_{2,\infty}. \quad (45)$$

1051 **Bounding**  $\widehat{U}_r H_r \Lambda_r H_r^\dagger \widehat{U}_r^\dagger - U_r \Lambda_r U_r^\dagger$ : One checks easily that

$$\widehat{U}_r H_r \Lambda_r H_r^\dagger \widehat{U}_r^\dagger - U_r \Lambda_r U_r^\dagger = (\widehat{U}_r H_r - U_r) \Lambda_r U_r^\dagger + U_r \Lambda_r (\widehat{U}_r H_r - U_r)^\dagger + (\widehat{U}_r H_r - U_r) \Lambda_r (\widehat{U}_r H_r - U_r)^\dagger.$$

1052 The first of these terms can be bounded as

$$\|(\widehat{U}_r H_r - U_r) \Lambda_r U_r^\dagger\|_{2,\infty} \leq \|\widehat{U}_r H_r - U_r\|_{2,\infty} \|\Lambda_r\| \|U_r^\dagger\| \leq |\lambda_1| \|\widehat{U}_r H_r - U_r\|_{2,\infty},$$

1053 the second as

$$\begin{aligned} \|U_r \Lambda_r (\widehat{U}_r H_r - U_r)^\dagger\|_{2,\infty} &\leq \|U_r \Lambda_r\|_{2,\infty} \|\widehat{U}_r H_r - U_r\| \\ &\leq \frac{2 \|M\|_{2,\infty} \|E U_r\|}{\Delta_r} \end{aligned}$$

1054 using the same bound as for (42). Finally the third term combines the two bounds:

$$\begin{aligned} \|(\widehat{U}_r H_r - U_r) \Lambda_r (\widehat{U}_r H_r - U_r)^\dagger\|_{2,\infty} &\leq \|\widehat{U}_r H_r - U_r\|_{2,\infty} \|\Lambda_r\| \|\widehat{U}_r H_r - U_r\| \\ &\leq \frac{2 |\lambda_1| \|E U_r\| \|\widehat{U}_r H_r - U_r\|_{2,\infty}}{\Delta_r} \\ &\leq \frac{1}{4} |\lambda_1| \|\widehat{U}_r H_r - U_r\|_{2,\infty} \end{aligned}$$

1055 if  $\|E U_r\| \leq \Delta_r/8$ . All in all, this gives

$$\|\widehat{U}_r H_r \Lambda_r H_r^\dagger \widehat{U}_r^\dagger - U_r \Lambda_r U_r^\dagger\|_{2,\infty} \leq \frac{5}{4} |\lambda_1| \|\widehat{U}_r H_r - U_r\|_{2,\infty} + \frac{2 \|M\|_{2,\infty} \|E U_r\|}{\Delta_r}. \quad (46)$$

1056 Combining the two bounds (45) and (46) together yields the result.  $\square$

## E Concentration in spectral norm for stochastic matrices

The goal of this appendix and the next is to prove Theorem 7 and Lemma 7. Instead of using off-the-shelf inequalities like Bernstein's inequality, we establish the concentration inequalities that we need using Stein's method of exchangeable pairs and more precisely the arguments of Chatterjee (9). We thus establish a general concentration inequality for the empirical estimator of a stochastic matrix in Theorem 8, which to the best of our knowledge is new. This appendix also gives a brief account of the method of exchangeable pairs for concentration and its extension to matrix inequalities developed in (46; 38).

### E.1 Main concentration inequality

**Theorem 8.** *Let  $P \in \mathbb{R}^{n \times m}$  be a stochastic matrix and  $\mu, \nu$  two probability measures on  $[m], [n]$  respectively. Suppose that for each  $i \in [n]$  we have drawn  $Z_i$  independent samples from  $P(i, \cdot)$  and for all  $j \in [m]$ , let  $Y_{ij}$  count the number of samples with value  $j$ . Let  $\widehat{P}(i, j) = Y_{ij}/Z_i$  be the empirical estimator of  $P$ . For all  $t \geq 0$*

$$\mathbb{P} \left[ \left\| \widehat{P} - P \right\|_{\ell^2(\mu), \ell^2(\nu)} \geq t \right] \leq (n + 3m) \exp \left( \frac{-t^2 \min_{i \sim j} \frac{Z_i \mu(j)}{\nu(i) + \mu(j)}}{8(t + 2 \|P^\dagger\|_{\infty, \infty})} \right).$$

where the minimum is over all pairs  $(i, j) \in [n] \times [m]$  such that  $P(i, j) > 0$ , and the adjoint  $P^\dagger$  is w.r.t.  $\mu$  and  $\nu$ .

### E.2 The method of exchangeable pairs

The method of exchangeable pairs consists eventually in establishing a differential inequality on the moment generating function (m.g.f.) that can be integrated to be combined with Chernoff's bound. In the matrix case, the argument can be extended to Hermitian matrices (and to more general matrices thanks to a classical dilation trick) using the matrix m.g.f.: letting  $\text{tr} := n^{-1} \text{tr}$  denote the normalized trace, the matrix m.g.f. of a Hermitian random matrix  $Z \in \mathbb{C}^{n \times n}$  is

$$M_Z(\theta) := \mathbb{E} \text{tr} \left[ e^{\theta Z} \right], \quad \theta \in \mathbb{R}. \quad (47)$$

We use a lower-case to denote the log of the m.g.f.:

$$m_Z(\theta) := \log M_Z(\theta).$$

We have the following m.g.f. bounds:

**Proposition 8.** (46)[Prop. B.2] *Let  $Z \in \mathbb{C}^{n \times n}$  be a Hermitian random matrix. Let  $\lambda_{\max}(Z), \lambda_{\min}(Z)$  denote respectively the maximal and minimal eigenvalue of  $Z$ . For all  $t \in \mathbb{R}$ ,*

$$\mathbb{P} [\lambda_{\max}(Z) \geq t] \leq n \inf_{\theta > 0} \exp (-\theta t + m_Z(\theta)) \quad (48)$$

$$\mathbb{P} [\lambda_{\min}(Z) \leq t] \leq n \inf_{\theta < 0} \exp (-\theta t + m_Z(\theta)). \quad (49)$$

Suppose now  $Z = \phi(X)$  where  $X$  is a random variable taking values in a Banach space and  $\phi$  is a map with Hermitian matrix values. We may write simply  $\mathbb{E}[\phi]$  for  $\mathbb{E}[\phi(X)]$ . An exchangeable pair is simply a pair of random variables  $(X, \tilde{X})$  such that  $(X, \tilde{X}) \stackrel{(d)}{=} (\tilde{X}, X)$  in distribution. The technique requires next to find a map  $K = K(X, \tilde{X})$  such that

1.  $K(X, \tilde{X}) = -K(X, \tilde{X})$ ,
2.  $\mathbb{E} [K(X, \tilde{X}) \mid X] = \phi(X) - \mathbb{E} [\phi]$ .

where we write  $\mathbb{E}[\phi] = \mathbb{E}[\phi(X)]$  to simplify notation. Combining the two properties we obtain that for any function  $h$  with matrix values

$$\mathbb{E} [h(X)(\phi(X) - \mathbb{E} [\phi])] = \frac{1}{2} \mathbb{E} [(h(X) - h(\tilde{X}))K(X, \tilde{X})].$$

1090 Applied to  $h(X) = e^{\theta(\phi(X) - \mathbb{E}[\phi])}$  this implies that

$$\mathbb{E} \bar{\text{tr}} \left[ e^{\theta(\phi(X) - \mathbb{E}[\phi])} (\phi(X) - \mathbb{E}[\phi]) \right] = \mathbb{E} \bar{\text{tr}} \left[ (e^{\theta(\phi(X) - \mathbb{E}[\phi])} - e^{\theta(\phi(\tilde{X}) - \mathbb{E}[\phi])}) K(X, \tilde{X}) \right].$$

1091 One can then notice that  $\mathbb{E} \bar{\text{tr}} [\phi(X) e^{\theta\phi(X)}] = M'_{\phi(X)}(\theta)$ . On the other hand, the right hand side can  
 1092 be further bounded using mean value inequality, which is straightforward in the scalar case while in  
 1093 the matrix case one arrives at the following.

1094 **Lemma 10.** (46)[Lemma B.4] For all  $\theta \in \mathbb{R}$  we have

$$|M'_{\phi(X) - \mathbb{E}[\phi]}(\theta)| \leq \frac{1}{2} |\theta| \inf_{s>0} \mathbb{E} \bar{\text{tr}} [(sV_\phi(X) + s^{-1}V_K(X))e^{\theta X}] \quad (50)$$

1095 where

$$V_\phi(X) := \frac{1}{2} \mathbb{E} [(\phi(X) - \phi(\tilde{X}))^2 \mid X], \quad V_K(X) := \frac{1}{2} \mathbb{E} [K(X, \tilde{X})^2 \mid X].$$

1096 The goal is then to obtain positive semi-definite (p.s.d) inequalities on  $V_\phi$ , typically of the form  
 1097  $V_\phi(X) \leq \gamma I + \beta \phi(X)$ . Here we write  $A \geq B$  if  $A - B$  is p.s.d.. This would result in a differential  
 1098 inequality on  $M_{\phi(X) - \mathbb{E}[\phi]}(\theta)$  that can be integrated to obtain a bound on the log m.g.f.

$$m_Z(\theta) \leq \frac{\gamma \theta^2}{2(1 - \beta \theta)}$$

1099 which in turn translates to a Bernstein-like inequality for  $\phi(X)$  by taking  $\theta := t/(\gamma + \beta t)$  in Proposition  
 1100 8:

1101 **Theorem A.** (46)[Thm. 3.1] Suppose there exist constants  $\gamma, \beta \geq 0, s > 0$  such that

$$V_\phi(X) \leq s^{-1}(\gamma I + \beta \phi(X)), \quad V_K(X) \leq s(\gamma I + \beta \phi(X)) \quad \text{a.s.}$$

1102 Then for all  $t \geq 0$

$$\begin{aligned} \mathbb{P}[\lambda_{\max}(\phi(X)) \geq t] &\leq \exp\left(\frac{-t^2}{2(\gamma + \beta t)}\right) \\ \mathbb{P}[\lambda_{\min}(\phi(X)) \geq t] &\leq \exp\left(\frac{-t^2}{2\gamma}\right). \end{aligned}$$

1103 The previous arguments require the random matrix  $\phi(X)$  to be Hermitian. The more general case can  
 1104 easily be dealt with thanks to a Hermitian dilation trick, namely by considering the random matrix  
 1105  $\begin{pmatrix} 0 & \phi(X) \\ \phi(X)^\dagger & 0 \end{pmatrix}$ .

### 1106 E.3 Exchangeable pairs for independent multinomial variables

1107 We now show how the method of exchangeable pairs can be applied to prove concentration for  
 1108 functionals of multinomial variables, which is the setting that appears in the case of transitions  
 1109 observed independently. Let  $P \in \mathbb{R}^{n \times m}$  be a stochastic matrix,  $Z = (Z_i)_{i \in [n]}$  a deterministic  
 1110 sequence of integers,  $N := \sum_{i=1}^n Z_i$  and  $Y = (Y_i)_{i \in [n]}$  a random matrix of independent multinomial  
 1111 variables with  $Y_i \sim \text{Multinom}(Z_i, P(i, \cdot))$  for each  $i$ . We write  $\widehat{P}(i, j) = Y_{ij}/Z_i$  for the empirical  
 1112 estimator of the matrix  $P$ . All norms  $\|\cdot\|$  considered in this section are spectral norms with respect to  
 1113 underlying probability measures  $\mu, \nu$  on  $[m], [n]$ .

1114 The first step is to devise a nice exchangeable pair. A very natural one is as follows: let  $I \in [n], J, K \in$   
 1115  $[m]$  be three random indices such that  $J, K$  are independent conditional on  $I$  and with law given by

$$\begin{aligned} \mathbb{P}[I = i \mid Y] &= \frac{Z_i}{N} \\ \mathbb{P}[J = j \mid I = i, Y] &= \frac{Y_{ij}}{Z_i} = \widehat{P}(i, j), \quad \mathbb{P}[K = k \mid I = i, Y] = P(i, k). \end{aligned} \quad (51)$$

1116 Then let  $\tilde{Y} := Y + \mathbb{1}_{IK} - \mathbb{1}_{IJ}$ . To see why  $(Y, \tilde{Y})$  forms an exchangeable pair, interpret  $Y_{ij}$  as follows:  
 1117 consider  $N$  balls of  $n$  different colors are distributed in  $m$  urns independently, such that for each  $i$ ,

there are  $Z_i$  balls of color  $i$ , which fall in urn  $j$  with probability  $P_{ij}$ . Then the number of balls of color  $i$  in urn  $j$  has the law of  $Y_{ij}$ , and  $\tilde{Y}_{ij}$  is realized by choosing one ball uniformly at random and putting it in a new urn. It is thus immediate that  $(Y, \tilde{Y})$  forms an exchangeable pair.

Given a function  $\phi : \mathbb{R}^{n \times m} \rightarrow \mathbb{R}^{n' \times m'}$ , let  $\Delta_{ij}\phi(Y) := \phi(Y + \mathbb{1}_{ij}) - \phi(Y)$ . Note that if  $\phi$  is an affine function,  $\Delta_{ij}\phi(Y)$  does not in fact depend in  $Y$ , so we may write only  $\Delta_{ij}\phi$ .

**Proposition 9.** Let  $\phi : \mathbb{R}^{n \times m} \rightarrow \mathbb{R}^{n' \times m'}$  be an affine function with matrix values.

(i) For all  $t \geq 0$ ,

$$\mathbb{P}[\|\phi(Y) - \mathbb{E}[\phi(Y)]\| \geq t] \leq (n' + m') \exp\left(\frac{-t^2}{2N(\mathbb{E}_{I,J} \|\Delta_{IJ}\phi\|^2 + \mathbb{E}_{I,K} \|\Delta_{IK}\phi\|^2)}\right).$$

the expectations  $\mathbb{E}_{I,J}, \mathbb{E}_{I,K}$  being with respect to  $I, J, K$  as defined in (51).

(ii) Furthermore, if almost surely  $\phi(Y)$  is self-adjoint and  $\Delta_{ij}\phi(Y) \geq 0$  for all  $i, j$ , then for all  $t \geq 0$

$$\mathbb{P}[\|\phi(Y) - \mathbb{E}[\phi(Y)]\| \geq t] \leq n' \exp\left(\frac{-t^2}{2 \max_{i,j} \|\Delta_{ij}\phi\| (t + 2 \|\mathbb{E}[\phi(Y)]\|)}\right).$$

*Proof.* In order to apply Theorem A, we suppose first  $\phi$  to have self-adjoint values and will extend the first inequality to more general functions by a dilation trick. Note furthermore that we can suppose without loss of generality that the constant term of the function is zero. Combined with the affine assumption, this implies that  $\phi$  is linear and can be expressed as

$$\phi(Y) = \sum_{i,j} Y(i, j) \Delta_{ij}\phi$$

with  $\Delta_{ij}\phi = \Delta_{ij}\phi(Y)$  being independent of  $Y$ . Averaging over  $Y$  shows

$$\mathbb{E}[\phi(Y)] = \sum_{i,j} Z_i P(i, j) \Delta_{ij}\phi.$$

Then from the distributions of  $I, J, K$  (51) we deduce

$$\mathbb{E}[\Delta_{IJ}\phi \mid Y] = \frac{1}{N}\phi(Y), \quad \mathbb{E}[\Delta_{IK}\phi \mid Y] = \frac{1}{N}\mathbb{E}[\phi(Y)], \quad (52)$$

From these, we claim that  $K(Y, \tilde{Y}) := N(\phi(Y) - \phi(\tilde{Y}))$  satisfies  $\mathbb{E}[K(Y, \tilde{Y}) \mid Y] = \phi(Y) - \mathbb{E}[\phi(Y)]$ . Indeed the definition of  $\tilde{Y}$  implies

$$\begin{aligned} \phi(Y) - \phi(\tilde{Y}) &= \Delta_{IJ}\phi(Y - \mathbb{1}_{IJ}) - \Delta_{IK}\phi(Y - \mathbb{1}_{IJ}) \\ &= \Delta_{IJ}\phi - \Delta_{IK}\phi \end{aligned} \quad (53)$$

so averaging over  $I, J, K$  and using (52) yields the claim.

In view of applying Theorem A, we are only left with upper bounding with  $V_\phi(Y) = \frac{1}{2}\mathbb{E}[(\phi(Y) - \phi(\tilde{Y}))^2 \mid Y]$  and  $V_K(Y) = \frac{1}{2}\mathbb{E}[K(Y, \tilde{Y})^2 \mid Y]$ , but by what precedes  $V_K(Y) = N^2 V_\phi(Y)$ . Using (53) and the p.s.d-convexity of the matrix square (ie..  $((1-t)A + tB)^2 \leq (1-t)A^2 + tB^2$  for all self-adjoint matrices  $A, B$  and  $t \in [0, 1]$ )

$$\begin{aligned} V_\phi(Y) &= \frac{1}{2}\mathbb{E}[\|\Delta_{IJ}\phi - \Delta_{IK}\phi\|^2 \mid Y] \\ &\leq \mathbb{E}[\|\Delta_{IJ}\phi\|^2 + \|\Delta_{IK}\phi\|^2 \mid Y] \\ &= \mathbb{E}_{I,J} \|\Delta_{IJ}\phi\|^2 + \mathbb{E}_{I,K} \|\Delta_{IK}\phi\|^2 \end{aligned}$$

Applying Theorem A with  $\gamma = N(\mathbb{E}_{I,J} \|\Delta_{IJ}\phi\|^2 + \mathbb{E}_{I,K} \|\Delta_{IK}\phi\|^2)$ ,  $\beta = 0$  and  $s = N$  gives thus the first inequality.

1143 If we assume furthermore all the  $\Delta_{ij}$  are psd, the positivity implies we can bound

$$(\Delta_{ij}\phi)^2 \leq \|\Delta_{ij}\phi\| \|\Delta_{ij}\phi\| \leq \max_{k,l} \|\Delta_{kl}\phi\| \|\Delta_{ij}\phi\|$$

1144 for all  $i, j$ . Consequently,

$$\begin{aligned} V_\phi(Y) &\leq \max_{k,l} \|\Delta_{kl}\phi\| \mathbb{E} [\Delta_{IJ}\phi + \Delta_{IK}\phi \mid Y] \\ &= N^{-1} \max_{k,l} \|\Delta_{kl}\phi\| (\phi(Y) + \mathbb{E}[\phi]) \\ &= N^{-1} \max_{k,l} \|\Delta_{kl}\phi\| (\phi(Y) - \mathbb{E}[\phi] + 2\mathbb{E}[\phi]) \end{aligned}$$

1145 by (52). Thus applying Theorem A again with  $s = N$  but this time  $\gamma = 2 \max_{k,l} \|\Delta_{kl}\phi\| \mathbb{E}[\phi]$  and  
1146  $\beta = \max_{k,l} \|\Delta_{kl}\phi\|$  yields the second inequality.

1147 Finally the first inequality extends to the non self-adjoint case by considering the self-adjoint  
1148 dilation  $\psi(Y) := \begin{pmatrix} 0 & \phi(Y) \\ \phi(Y)^\dagger & 0 \end{pmatrix}$ , simply noticing that  $\|\psi(Y) - \mathbb{E}[\psi(Y)]\| = \|\phi(Y) - \mathbb{E}[\phi(Y)]\|$   
1149 and  $\|\Delta_{ij}\psi(Y)\|^2 = \|\Delta_{ij}\phi(Y)\|^2$ .  $\square$

#### 1150 E.4 Concentration of the empirical estimator

1151 We now apply the previous results in order to prove Theorem 8. Note that as a function of  $Y$ ,

$$\Delta_{ij}\widehat{P} = \frac{1}{Z_i} \mathbb{1}_i \mathbb{1}_j^\top \quad (54)$$

1152 if  $P(i, j) > 0$  and 0 otherwise.

1153 The proof will require controlling the adjoint  $\widehat{P}^\dagger$ , which leads us to first prove concentration of the  
1154 functional  $\nu\widehat{P}(j) - \nu P(j)$ , for each  $j \in [n]$ .

1155 **Lemma 11.** *For all  $j \in [m]$ ,  $t \geq 0$ ,*

$$\mathbb{P} [|\nu\widehat{P}(j) - \nu P(j)| \geq t] \leq 2 \exp \left( \frac{-t^2 \min_{i:i \sim j} \frac{Z_i}{\nu(i)}}{2(t + 2\nu P(j))} \right) \quad (55)$$

1156 where  $i \sim j$  denotes the fact that  $P(i, j) > 0$ .

1157 As a consequence

$$\mathbb{P} [\|\widehat{P}^\dagger\|_{\infty, \infty} - \|P^\dagger\|_{\infty, \infty} \geq t] \leq 2m \exp \left( \frac{-t^2 \min_{i:i \sim j} \frac{Z_i \mu(j)}{\nu(i)}}{2(t + 2\|P^\dagger\|_{\infty, \infty})} \right) \quad (56)$$

1158 *Proof.* Fix  $j \in [m]$  and let  $\phi(Y) := \nu\widehat{P}(j)$ . This is a scalar function, linear with respect to  $Y$ , with

$$0 \leq \Delta_{ik}\phi(Y) = \frac{\nu(i)}{Z_i} \mathbb{1}_{k=j} \leq \max_{l:l \sim j} \frac{\nu(l)}{Z_l}.$$

1159 Thus we can apply the second inequality of Proposition 9 to obtain the first inequality.

1160 The second inequality is a consequence of the first: note that by (11)  $\|\widehat{P}^\dagger\|_{\infty, \infty} = \max_{j \in [m]} \frac{\nu\widehat{P}(j)}{\mu(j)}$   
1161 and so by union bound

$$\begin{aligned} \mathbb{P} [\|\widehat{P}^\dagger\|_{\infty, \infty} - \|P^\dagger\|_{\infty, \infty} \geq t] &= \mathbb{P} \left[ \max_{j \in [m]} |\nu\widehat{P}(j) - \nu P(j)| \geq t\mu(j) \right] \\ &\leq 2m \max_{j \in [m]} \exp \left( \frac{-t^2 \min_{i:i \sim j} \frac{Z_i \mu(j)^2}{\nu(i)}}{2(t\mu(j) + 2\nu P(j))} \right) \\ &\leq 2m \exp \left( \frac{-t^2 \min_{i:i \sim j} \frac{Z_i \mu(j)}{\nu(i)}}{2(t + 2\|P^\dagger\|_{\infty, \infty})} \right). \end{aligned}$$

1162  $\square$

1163 Moving to the concentration of  $\widehat{P}$ , the inequality of Point (i) in Proposition 9 does not yield an  
 1164 optimal result due to the additional factor  $N$ . To resort to the second inequality, we need to consider  
 1165 a p.s.d. matrix. The idea is that for any square self-adjoint stochastic matrix  $Q$ ,  $I - Q$  is p.s.d.. Thus  
 1166  $Q = I - (I - Q)$  can always be expressed as a difference of two p.s.d matrices, which motivates us to  
 1167 also express our self-adjoint random matrix as the difference of two psd matrices.

1168 **Lemma 12.** *Let  $\mu$  be a measure on  $[n]$ ,  $Q \in \mathbb{R}^{n \times n}$  such that  $Q^\dagger = Q$  with respect to  $\mu$ , and  $f \in \mathbb{R}^n$ .  
 1169 If  $Q\mathbb{1} = 0$  and  $Q(i, j) \leq 0$  for all  $i \neq j$ , then*

$$\langle Qf, f \rangle = -\frac{1}{2} \sum_{i,j \in [n]} \mu(i)Q(i, j) (f(i) - f(j))^2.$$

1170 In particular  $Q \geq 0$ .

1171 *Proof.* Let  $f \in \mathbb{R}^n$ . Then

$$\begin{aligned} \langle Qf, f \rangle_\mu &= \sum_{i,j} \mu(i)Q(i, j)f(i)f(j) \\ &= \sum_{i,j} \mu(i)Q(i, j)f(i)(f(j) - f(i)) \\ &= \frac{1}{2} \sum_{i,j} \mu(i)Q(i, j)f(i)(f(j) - f(i)) + f(j)(f(i) - f(j)) \\ &= -\frac{1}{2} \sum_{i,j} \mu(i)Q(i, j)(f(i) - f(j))^2 \geq 0. \end{aligned}$$

1172 The second equality uses  $Q\mathbb{1} = 0$ , the third uses  $Q^\dagger = Q$  and the inequality arises from the hypothesis  
 1173 that  $Q(i, j) \leq 0$  whenever  $i \neq j$ .  $\square$

1174 *Proof of Theorem 8.* We use the standard dilation trick to reduce to the self-adjoint case, i.e. we  
 1175 prove concentration of the  $(n + m) \times (n + m)$  matrix  $\begin{pmatrix} 0 & \widehat{P} \\ \widehat{P}^\dagger & 0 \end{pmatrix}$ . The concentration is in spectral norm  
 1176 with respect to the probability measure  $\frac{1}{2}(\nu_{[n]} + \mu_{[m]})$ , which gives the same adjoint operators.

1177 Let  $D_1, D_2$  be the two random diagonal matrices defined by  $D_1(i) = \sum_{j \in [m]} \widehat{P}(i, j)$  and  $D_2(j) =$   
 1178  $\sum_{i \in [n]} \nu(i) \widehat{P}(i, j)/\mu(j) = \sum_{i \in [n]} \widehat{P}^\dagger(j, i)$ . Note that  $D_1$  evaluates to the identity matrix, however it  
 1179 is not equal to the identity as a formal function of the random variable  $Y$ . One can then express

$$\begin{pmatrix} 0 & \widehat{P} \\ \widehat{P}^\dagger & 0 \end{pmatrix} = \begin{pmatrix} D_1 & 0 \\ 0 & D_2 \end{pmatrix} - \begin{pmatrix} D_1 & -\widehat{P} \\ -\widehat{P}^\dagger & D_2 \end{pmatrix}.$$

1180 and thus

$$\|\widehat{P} - P\| \leq \lambda_{\max} \left( \begin{pmatrix} D_1 & 0 \\ 0 & D_2 \end{pmatrix} - \begin{pmatrix} \mathbb{E}[D_1] & 0 \\ 0 & \mathbb{E}[D_2] \end{pmatrix} \right) - \lambda_{\min} \left( \begin{pmatrix} D_1 & -\widehat{P} \\ -\widehat{P}^\dagger & D_2 \end{pmatrix} - \begin{pmatrix} \mathbb{E}[D_1] & -P \\ -P^\dagger & \mathbb{E}[D_2] \end{pmatrix} \right). \quad (57)$$

1181 Notice that the norm of the diagonal matrix  $D_2$  is  $\|D_2\| = \max_{j \in [m]} \nu \widehat{P}(j)/\mu(j) = \|\widehat{P}^\dagger\|_{\infty, \infty}$ , so  
 1182 from Lemma 11 we have

$$\begin{aligned} \mathbb{P} \left[ \lambda_{\max} \left( \begin{pmatrix} D_1 & 0 \\ 0 & D_2 \end{pmatrix} - \begin{pmatrix} \mathbb{E}[D_1] & 0 \\ 0 & \mathbb{E}[D_2] \end{pmatrix} \right) \geq t \right] &\leq 2m \exp \left( \frac{-t^2 \min_{i \sim j} \frac{Z_i \mu(j)}{\nu(i)}}{2(t + 2\|P^\dagger\|_{\infty, \infty})} \right) \\ &\leq 2m \exp \left( \frac{-t^2}{2\kappa(t + 2\|P^\dagger\|_{\infty, \infty})} \right) \end{aligned} \quad (58)$$

1183 where we write  $\kappa := \max_{i \sim j} \frac{\nu(i) + \mu(j)}{Z_i \mu(j)}$ . Thus it remains to establish the concentration of the matrix

1184  $\phi := \begin{pmatrix} D_1 & -\widehat{P} \\ -\widehat{P}^\dagger & D_2 \end{pmatrix}$ , for which we will apply Proposition 9. By Lemma 12, for all  $f = (f_1 \ f_2)^\top \in \mathbb{R}^{n+m}$ ,

$$\begin{aligned} \langle \Delta_{ij} \phi(Y) f, f \rangle &= \frac{1}{2} \sum_{x \in [n], y \in [m]} \nu(x) \Delta_{ij} \widehat{P}(x, y) (f_1(x) - f_2(y))^2 \\ &= \frac{\nu(i)}{2Z_i} (f_1(i) - f_2(j))^2 \\ &\leq \frac{\nu(i)}{2Z_i} \left( \frac{1}{\nu(i)} + \frac{1}{\mu(j)} \right) (\nu(i)f_1(i)^2 + \mu(j)f_2(j)^2) \end{aligned}$$

1185 applying Cauchy-Schwarz inequality. Assuming furthermore  $\|f\| = 1$  we can bound  
 1186  $\frac{1}{2} (\nu(i)f_1(i)^2 + \mu(j)f_2(j)^2) \leq 1$ , so we deduce

$$\begin{aligned} \|\Delta_{ij}\phi(Y)\| &= \sup_{\|f\|=1} \langle \Delta_{ij}\phi(Y)f, f \rangle \\ &\leq \frac{\nu(i) + \mu(j)}{Z_i\mu(j)} \\ &\leq \kappa. \end{aligned}$$

1187 The above computation also shows that  $\Delta_{ij}\phi(Y)$  is p.s.d., so Point (ii) of Proposition 9 applies to  
 1188 yield that for all  $t \geq 0$

$$\mathbb{P}[\lambda_{\min}(\phi(Y) - \mathbb{E}[\phi]) \leq -t \mid Z] \leq (n+m) \exp\left(\frac{-t^2}{2\kappa(t+2\|\mathbb{E}[\phi]\|)}\right).$$

1189 By the Riesz-Thorin interpolation theorem and duality (9),  $\|\mathbb{E}[\phi]\| = \|P\|_{2,2} \leq \|P\|_{1,1}^{1/2} \|P\|_{\infty,\infty}^{1/2} =$   
 1190  $\|P^\dagger\|_{\infty,\infty}^{1/2}$ , and using (57) and (58) we get finally

$$\begin{aligned} \mathbb{P}[\|\widehat{P} - P\| \geq t \mid Z] &\leq \mathbb{P}[\|\widehat{P}^\dagger\|_{\infty,\infty} - \|P^\dagger\|_{\infty,\infty} \geq t/2 \mid Z] \\ &\quad + \mathbb{P}[\lambda_{\min}(\phi(Y) - \mathbb{E}[\phi]) \leq -t/2 \mid Z] \\ &\leq 2m \exp\left(\frac{-t^2}{8\kappa(t+2\|P^\dagger\|_{\infty,\infty})}\right) + (n+m) \exp\left(\frac{-t^2}{8\kappa(t+2\|P^\dagger\|_{\infty,\infty}^{1/2})}\right). \end{aligned}$$

1191 which yields the result, observing  $\|P^\dagger\|_{\infty,\infty} \geq 1$ . □

## F Extension to shifted successor measures and leave-one-out concentration

In this appendix we leverage the concentration for the empirical estimator  $\widehat{P} \in \mathbb{R}^{\mathcal{X} \times \mathcal{S}}$  established in Theorem 8 to deduce concentration for more complex functionals of  $\widehat{P}$ . First we exploit linearity and contraction properties of the map  $P \mapsto P_\pi$  to obtain concentration in spectral norm for the policy-evaluated matrix  $\widehat{P}_\pi$ . Then we use simple identities to deduce concentration for the shifted successor measures  $\widehat{M}_{\pi,k}$ . Finally we establish the technical concentration inequalities of Lemma 7.

### F.1 Contraction properties of the map $P \mapsto P_\pi$

Given a policy  $\pi$ , consider the following linear operator on vectors:

$$\begin{aligned} K_\pi : \mathbb{R}^{\mathcal{X}} &\rightarrow \mathbb{R}^{\mathcal{S}} \\ f &\mapsto \sum_{a \in \mathcal{A}} \pi(s, a) f(s, a). \end{aligned} \quad (59)$$

Note that  $K$  can be identified with a  $\mathcal{S} \times \mathcal{X}$  matrix, namely  $K_\pi(s', s, a) = \pi(s, a) \mathbb{1}_{s'=s}$  so we can see that

$$P_\pi = P K_\pi. \quad (60)$$

Given a probability measure  $\mu$  on  $\mathcal{S}$ , let us write  $\mu \rtimes \pi$  the probability measure on  $\mathcal{X}$  given by  $\mu \rtimes \pi(s, a) := \mu(s) \pi(s, a)$ . Note any probability measure on  $\mathcal{X}$  has this form, as  $\pi(s, \cdot)$  is thus the law of the action conditional of the state.

**Lemma 13.** *For all probability measure  $\mu$  on  $\mathcal{S}$ , policy  $\pi$ ,*

$$(i) \quad \|K_\pi\|_{\infty, \infty} = 1,$$

$$(ii) \quad \|K_\pi\|_{\ell^2(\mu \rtimes \pi), \ell^2(\mu)} \leq 1,$$

$$(iii) \quad \text{for all } (s, a), (s', a') \in \mathcal{X}, P^\dagger(s', s, a) = (P_\pi)^\dagger(s', a', s, a).$$

Here  $P^\dagger$  is the adjoint of  $P$  as an operator  $\ell^2(\mu) \rightarrow \ell^2(\mu \rtimes \pi)$ , while  $P_\pi^\dagger$  is the adjoint of  $P_\pi$  which is an operator  $\ell^2(\mu \rtimes \pi) \rightarrow \ell^2(\mu \rtimes \pi)$ .

*Proof.* Let  $\mu$  be a probability measure on  $\mathcal{S}$  and  $\pi$  a policy. Point (i) comes from the fact that  $K$  is a stochastic matrix. Then by Jensens's inequality for all  $f \in \mathbb{R}^{\mathcal{X}}$

$$\begin{aligned} \|K_\pi f\|_{\ell^2(\mu)}^2 &= \sum_{s \in \mathcal{S}} \mu(s) \left( \sum_{a \in \mathcal{A}} \pi(s, a) f(s, a) \right)^2 \\ &\leq \sum_{(s, a) \in \mathcal{X}} \mu(s) \pi(s, a) f(s, a)^2 = \|f\|_{\ell^2(\mu \rtimes \pi)}^2 \end{aligned}$$

which implies that  $\|K_\pi\|_{\ell^2(\mu \rtimes \pi), \ell^2(\mu)} \leq 1$ . Finally, by definition

$$\begin{aligned} P^\dagger(s', s, a) &= \frac{\mu(s) \pi(s, a) P(s, a, s')}{\mu(s')} \\ &= \frac{\mu(s) \pi(s, a) P(s, a, s') \pi(s', a')}{\mu(s') \pi(s', a')} \\ &= \frac{\mu \rtimes \pi(s, a) P_\pi(s, a, s', a')}{\mu \rtimes \pi(s', a')} = P_\pi^\dagger(s', a', s, a) \end{aligned}$$

and thus  $\|P^\dagger\|_{\infty, \infty} = \|P_\pi^\dagger\|_{\infty, \infty}$ . □

### F.2 Extension to shifted successor measure: proof of Theorem 7

The concentration of shifted successor measures will be the consequence of a deterministic mean-value like bound, itself a consequence submultiplicativity and the following well-known identities: the telescopic sum formula

$$\prod_{i=1}^k a_i - \prod_{i=1}^k b_i = \sum_{j=1}^k \left( \prod_{i=1}^{j-1} a_i \right) (a_j - b_j) \left( \prod_{i=j+1}^k b_i \right) \quad (61)$$



1219 and the resolvent identity:

$$a^{-1} - b^{-1} = a^{-1}(b - a)b^{-1} = b^{-1}(b - a)a^{-1}. \quad (62)$$

1220 **Lemma 14.** *Let  $\mu$  a probability measure on  $[n]$  and consider here  $\|\cdot\| = \|\cdot\|_{\ell^2(\mu), \ell^2(\mu)}$ . Let  $A, B \in$   
 1221  $\mathbb{R}^{n \times n}$  with  $1 \leq \|B\| \leq \|A\|$ ,  $k \geq 0, \gamma \in [0, \|A\|^{-1}]$  and write  $\phi_{k,\gamma}(A) := A^k(I - \gamma A)^{-1}$ . Suppose  
 1222  $\|A - B\| \leq \min\left(\frac{\|B\|}{k}, \frac{1-\gamma\|B\|}{2}\right)$ . Then*

$$\|\phi_{k,\gamma}(A) - \phi_{k,\gamma}(B)\| \leq \frac{8\|B\|^k \max(k, (1-\gamma\|B\|)^{-1})}{1-\gamma\|B\|} \|A - B\|.$$

1223 *Proof.* First decomposing,

$$\begin{aligned} A^k(I - \gamma A)^{-1} - B^k(I - \gamma B)^{-1} &= (A^k - B^k)(I - \gamma B)^{-1} + B^k[(I - \gamma A)^{-1} - (I - \gamma B)^{-1}] \\ &\quad + (A^k - B^k)[(I - \gamma A)^{-1} - (I - \gamma B)^{-1}] \end{aligned}$$

1224 submultiplicativity of the spectral norm allows to bound

$$\begin{aligned} \|\phi_{k,\gamma}(A) - \phi_{k,\gamma}(B)\| &\leq \|A^k - B^k\| \|(I - \gamma B)^{-1}\| + \|B^k\| \|(I - \gamma A)^{-1} - (I - \gamma B)^{-1}\| \\ &\quad + \|A^k - B^k\| \|(I - \gamma A)^{-1} - (I - \gamma B)^{-1}\| \quad (63) \end{aligned}$$

1225 so it suffices essentially to consider the case of powers and successor measure separately. By the  
 1226 telescopic sum formula (61)

$$\begin{aligned} \|A^k - B^k\| &\leq \sum_{i=1}^k \|A\|^{i-1} \|A - B\| \|B\|^{k-i} \\ &= \|A - B\| \|B\|^{k-1} \frac{\left(\frac{\|A\|}{\|B\|}\right)^k - 1}{\frac{\|A\|}{\|B\|} - 1}. \end{aligned}$$

1227 Next we use that  $\|B\| \leq \|A\|$  with mean value inequality and the inequality  $1 + x \leq e^x$  to bound

$$\begin{aligned} \frac{\left(\frac{\|A\|}{\|B\|}\right)^k - 1}{\frac{\|A\|}{\|B\|} - 1} &\leq k \left(\frac{\|A\|}{\|B\|}\right)^{k-1} \\ &= k \left(1 + \frac{\|A - B\|}{\|B\|}\right)^{k-1} \\ &\leq k e^{(k-1) \frac{\|A - B\|}{\|B\|}}. \end{aligned}$$

1228 Supposing now  $\|A - B\| \leq \|B\|/k$  the exponential term is bounded by 3.

1229 On the other hand the resolvent identity (62) implies

$$\begin{aligned} \|(I - \gamma A)^{-1} - (I - \gamma B)^{-1}\| &\leq \gamma \|(I - \gamma A)^{-1}\| \|A - B\| \|(I - \gamma B)^{-1}\| \\ &\leq \frac{\gamma \|A - B\|}{(1 - \gamma\|B\|)(1 - \gamma(\|B\| + \|A - B\|))}. \end{aligned}$$

1230 Using the assumption that  $\|A - B\| \leq \frac{1-\gamma\|B\|}{2}$  the right hand side is bounded by  $\frac{2\gamma\|A - B\|}{(1-\gamma\|B\|)^2}$ . Plugging  
 1231 the previous bounds in (63) we deduce

$$\begin{aligned} \|\phi_{k,\gamma}(A) - \phi_{k,\gamma}(B)\| &\leq \frac{3k\|B\|^{k-1}\|A - B\|}{1 - \gamma\|B\|} + \frac{2\|B\|^k\|A - B\|}{(1 - \gamma\|B\|)^2} + \frac{6k\|B\|^{k-1}\|A - B\|^2}{(1 - \gamma\|B\|)^2} \\ &\leq \frac{\|B\|^k\|A - B\|}{1 - \gamma\|B\|} \left(3d + \frac{2}{1 - \gamma\|B\|} + \frac{6d\|A - B\|}{1 - \gamma\|B\|}\right) \end{aligned}$$

1232 which gives the result after using again  $\|A - B\| \leq \frac{1-\gamma\|B\|}{2}$ . □

1233 *Proof of Theorem 7.* Let  $\nu$  be a probability measure on  $\mathcal{X}$ , which can always be written as  $\nu =: \mu \rtimes \pi$   
 1234 for some probability measure  $\mu$  on  $\mathcal{S}$  and a policy  $\pi$ . Apply Theorem 8 to  $P \in \mathbb{R}^{\mathcal{X} \times \mathcal{S}}$  to obtain

$$\mathbb{P} \left[ \|\widehat{P} - P\|_{\ell^2(\mu), \ell^2(\nu)} \geq t \right] \leq 4n \exp \left( \frac{-t^2 \min_{(s,a) \sim s'} \frac{Z_{s,a} \mu(s')}{\nu(s,a) + \mu(s')}}{8(t + 2\|P^\dagger\|_{\infty, \infty})} \right).$$

1235 Then Point (iii) of Lemma 13 shows  $\|P^\dagger\|_{\infty, \infty} = \|P^\dagger\| = 1$  if  $\nu$  is supposed invariant. Then from (60)  
 1236 and Point (ii) of the lemma

$$\begin{aligned} \|\widehat{P}_\pi - P_\pi\|_{\ell^2(\nu), \ell^2(\nu)} &= \|(\widehat{P} - P)K_\pi\|_{\ell^2(\nu), \ell^2(\nu)} \\ &\leq \|\widehat{P} - P\|_{\ell^2(\mu), \ell^2(\nu)} \|K_\pi\|_{\ell^2(\nu), \ell^2(\mu)} \\ &\leq \|\widehat{P} - P\|_{\ell^2(\mu), \ell^2(\nu)} \end{aligned}$$

1237 thus the concentration of  $\widehat{P}$  immediately transfers to  $\widehat{P}_\pi$ . Finally we deduce the concentration of  
 1238  $\widehat{M}_{\pi,k}$  from the deterministic bound of Lemma 14. Supposing  $\nu$  invariant also implies  $\|P\| = 1$ .  
 1239 Thus for  $t \leq 1$  if  $\|\widehat{P} - P\| < t/C_{k,\gamma} \leq 1/C_{k,\gamma}$  the conditions of Lemma 14 are satisfied, which  
 1240 thus implies  $\|\widehat{M}_{\pi,k} - M_{\pi,k}\| \leq C_{k,\gamma} \|\widehat{P} - P\| < t$ . Therefore the events  $\{\|\widehat{P} - P\| < t/C_{k,\gamma}\}$  and  
 1241  $\{\|\widehat{M}_{\pi,k} - M_{\pi,k}\| \geq t\}$  are disjoint.  $\square$

### 1242 E.3 Leave-one-out concentration

1243 We now establish the technical concentration inequalities of Lemma 7. The proof strategy is similar  
 1244 to that of Theorem 7: we first establish concentration for linear functional of  $\widehat{P}$  in the following  
 1245 proposition, to combine them with the contraction properties of Lemma 13 and the identities (61)  
 1246 and (62).

1247 **Proposition 10.** Consider the same setting as in Theorem 8. Let  $A \in \mathbb{R}^{m \times p}$  and let  $\rho$  be a probability  
 1248 measure on  $[p]$ . For all  $l \in [n]$ , and  $t \geq 0$

$$1249 \quad (i) \quad \mathbb{P} \left[ \|\widehat{P}(l, \cdot)A - \widehat{P}^{(l)}(l, \cdot)A\|_{\ell^2(\rho)} \geq t \mid (Y_i)_{i \neq l} \right] \leq (p+1) \exp \left( \frac{-t^2 Z_l}{2\|A\|_{\ell^2(\rho), \ell^\infty}^2} \right),$$

$$1250 \quad (ii) \quad \mathbb{P} \left[ \|\widehat{P}A - PA\|_{\ell^2(\rho), \ell^\infty} \geq t \right] \leq n(p+1) \exp \left( \frac{-t^2 Z_{\min}}{2\|A\|_{\ell^2(\rho), \ell^\infty}^2} \right),$$

1251 *Proof.* For (i), fix  $l \in [n]$  and  $\phi(Y) := \widehat{P}(l, \cdot)A \in \mathbb{R}^{1 \times p}$ . Since we reason conditional on  $(Y_i)_{i \neq l}$ ,  $\phi$  is  
 1252 in fact here a function of the multinomial variable  $(Y_{lj})_{j \in [n]}$  only, so Proposition 9 applies with  $I = l$   
 1253 a.s., and  $N$  replaced with  $Z_l$  here. We can then bound

$$\|\Delta_{IJ}\phi\|_{\ell^2(\rho)}^2 = \frac{\|A(J, \cdot)\|_{\ell^2(\rho)}^2}{Z_l^2} \leq \frac{\|A\|_{\ell^2(\rho), \ell^\infty}^2}{Z_l^2}, \quad \|\Delta_{IK}\phi\|_{\ell^2(\rho)}^2 \leq \frac{\|A\|_{\ell^2(\rho), \ell^\infty}^2}{Z_l^2},$$

1254 so applying the point (i) of Proposition 9 gives (i). For (ii), noting that  $\|\widehat{P}^d A - P^d A\|_{\ell^2(\rho), \ell^\infty} :=$   
 1255  $\max_{l \in [n]} \|(\widehat{P}(l, \cdot) - P(l, \cdot))A\|_{\ell^2(\rho)}$ , it suffices to prove concentration of the latter row matrix for  
 1256 fixed  $l$ , which can be done as above, and use a union bound argument. The only difference lies in that  
 1257 we do not reason conditional on  $(Y_i)_{i \neq l}$  anymore, so now we bound

$$\begin{aligned} \mathbb{E}_{I,J} \left[ \|\Delta_{IJ}\phi\|_{\ell^2(\rho)}^2 \right] &= \frac{1}{N} \sum_{i,j \in [n]} Z_i \widehat{P}(i,j) \|\Delta_{ij}\phi\|_{\ell^2(\rho)}^2 \\ &= \frac{1}{N} \sum_{i,j \in [n]} \frac{\widehat{P}(i,j)}{Z_i} \mathbb{1}_{i=l} \|A(j, \cdot)\|_{\ell^2(\rho)}^2 \\ &\leq \frac{\|A\|_{\ell^2(\rho), \ell^\infty}^2}{NZ_l} \leq \frac{\|A\|_{\ell^2(\rho), \ell^\infty}^2}{NZ_{\min}} \end{aligned}$$

1258 and similarly for  $\mathbb{E}_{I,K} \|\Delta_{IK}\phi\|_{\ell^2(\rho)}^2$ . Applying point (i) of Proposition 9 gives (ii).  $\square$

1259 *Proof of Lemma 7.* We first by claim that the result of Proposition 10 also applies with  $P_\pi, \widehat{P}_\pi$  in  
 1260 place of  $P$  and  $\widehat{P}$ . The latter proved two inequalities of the form  $\mathbb{P}[\|(\widehat{P} - P)A\| \geq t] \leq f_t(\|A\|_{2,\infty})$   
 1261 where  $f_t$  is a non-decreasing function. From (60) we can bound

$$\begin{aligned}\mathbb{P}[\|(\widehat{P}_\pi - P_\pi)A\| \geq t] &= \mathbb{P}[\|(\widehat{P} - P)K_\pi A\| \geq t] \\ &\leq f_t(\|K_\pi A\|_{2,\infty}) \\ &\leq f_t(\|K_\pi\|_{\infty,\infty} \|A\|_{2,\infty}) \\ &= f_t(\|A\|_{2,\infty})\end{aligned}$$

1262 using the fact that  $f_t$  is non-decreasing and Point (i) of Lemma 13. This proves the claim. We will  
 1263 thus apply Proposition 10 as if it applied directly to  $P_\pi$ . For simplicity we omit the subscript for the  
 1264 rest of the proof, writing  $P$  in place of  $P_\pi$ .

1265 The proof of 24 is similar to that of Theorem 8. For other points, we also start by decomposing

$$\begin{aligned}\widehat{M}_{\pi,k}A - \widehat{M}_{\pi,k}^{(l)}A &= [\widehat{P}^k - (\widehat{P}^{(l)})^k] (I - \gamma \widehat{P}^{(l)})^{-1}A + (\widehat{P}^{(l)})^k [(I - \gamma \widehat{P})^{-1} - (I - \gamma \widehat{P}^{(l)})^{-1}]A \\ &\quad + [\widehat{P}^k - (\widehat{P}^{(l)})^k] [(I - \gamma \widehat{P})^{-1} - (I - \gamma \widehat{P}^{(l)})^{-1}]A. \quad (64)\end{aligned}$$

1266 Let  $B := (I - \gamma \widehat{P}^{(l)})^{-1}A$ . By the telescopic sum formula (61) the first term can be bounded as

$$\begin{aligned}\|[\widehat{P}^k(l, \cdot) - (\widehat{P}^{(l)})^k(l, \cdot)]B\|_{\ell^2(\rho)} &\leq \sum_{i=1}^k \|\widehat{P}^{i-1}(l, \cdot)(\widehat{P} - \widehat{P}^{(l)})(\widehat{P}^{(l)})^{k-i}B\|_{\ell^2(\rho)} \\ &= \sum_{i=1}^k |\widehat{P}^{i-1}(l, l)| \|(\widehat{P} - \widehat{P}^{(l)})(l, \cdot)(\widehat{P}^{(l)})^{k-i}B\|_{\ell^2(\rho)}\end{aligned}$$

1267 as  $(\widehat{P} - \widehat{P}^{(l)})(j, \cdot) = 0$  if  $j \neq l$ . Now observe the matrix  $(\widehat{P}^{(l)})^{k-i}B$  is independent of  $Y_l$ , so by point  
 1268 (i) of Proposition 10 and union bound the probability conditional on  $(Y_i)_{i \neq l}$  that one norm factor in  
 1269 the above sum is larger than  $t$  is at most  $k(p+1) \max_{i \in [k]} \exp\left(\frac{-t^2 Z_l}{2\|(\widehat{P}^{(l)})^{k-i}B\|_{\ell^2(\rho), \ell^\infty}^2}\right)$ . However for  
 1270 all  $i \in [k]$

$$\|(\widehat{P}^{(l)})^{k-i}B\|_{\ell^2(\rho), \ell^\infty}^2 \leq \|(\widehat{P}^{(l)})^{k-i}(I - \gamma \widehat{P}^{(l)})^{-1}\|_{\infty, \infty}^2 \|A\|_{\ell^2(\rho), \ell^\infty}^2 = \frac{\|A\|_{\ell^2(\rho), \ell^\infty}^2}{1 - \gamma}$$

1271 as  $(1 - \gamma)(\widehat{P}^{(l)})^{k-i}(I - \gamma \widehat{P}^{(l)})^{-1}$  is a stochastic matrix. Bounding also  $|\widehat{P}^{i-1}(l, l)| \leq 1$  we get  
 1272 eventually that

$$\mathbb{P}\left[\|[\widehat{P}^k(l, \cdot) - (\widehat{P}^{(l)})^k(l, \cdot)]B\|_{\ell^2(\rho)} \geq t \mid (Y_i)_{i \neq l}\right] \leq k(p+1) \exp\left(\frac{-t^2(1 - \gamma)^2 Z_l}{2k^2 \|A\|_{\ell^2(\rho), \ell^\infty}^2}\right).$$

1273 For the second term of (64), the resolvent identity (62) gives

$$\begin{aligned}\|(\widehat{P}^{(l)})^k [(I - \gamma \widehat{P})^{-1} - (I - \gamma \widehat{P}^{(l)})^{-1}](l, \cdot)A\| &= \gamma |(\widehat{P}^{(l)})^k (I - \gamma \widehat{P})^{-1}(l, l)| \|(\widehat{P} - \widehat{P}^{(l)})(l, \cdot)B\| \\ &\leq \frac{1}{1 - \gamma} \|(\widehat{P} - \widehat{P}^{(l)})(l, \cdot)B\|.\end{aligned}$$

1274 Thus with the same arguments as above point (i) of Proposition 10 shows

$$\mathbb{P}\left[\|(\widehat{P}^{(l)})^k [(I - \gamma \widehat{P})^{-1} - (I - \gamma \widehat{P}^{(l)})^{-1}](l, \cdot)A\| \geq t \mid (Y_i)_{i \neq l}\right] \leq (p+1) \exp\left(\frac{-t^2(1 - \gamma)^4 Z_l}{2\|A\|_{2,\infty}^2}\right).$$

1275 Finally the third term of (64) can be bounded as

$$\begin{aligned}\|[\widehat{P}^k - (\widehat{P}^{(l)})^k](l, \cdot) [(I - \gamma \widehat{P})^{-1} - (I - \gamma \widehat{P}^{(l)})^{-1}]A\| \\ &= \|[(\widehat{P}^k - (\widehat{P}^{(l)})^k)(I - \gamma \widehat{P})^{-1}](l, l) \|(\widehat{P} - \widehat{P}^{(l)})(l, \cdot)B\| \\ &\leq \frac{2}{1 - \gamma} \|(\widehat{P} - \widehat{P}^{(l)})(l, \cdot)B\|\end{aligned}$$

1276 and is thus controlled as the second term. Combining all three bounds yields 21.

1277 The proof of (22) follows similar arguments, using point( ii) of Proposition 10 instead.

1278 Finally for inequality (23) the proof is almost the same except there is no mul-  
 1279 tiplication by  $\mathbb{1}_l^\top$  on the left, so the factors  $|\widehat{P}^{i-1}(l, l)|$ ,  $|(\widehat{P}^{(l)})^k(I - \gamma\widehat{P})^{-1}(l, l)|$   
 1280 and  $||[(\widehat{P}^k - (\widehat{P}^{(l)})^k)(I - \gamma\widehat{P})^{-1}](\cdot, l)|$  need to be replaced with  $\|\widehat{P}^{i-1}(\cdot, l)\|_{\ell^2(\nu)}$ ,  
 1281  $\|(\widehat{P}^{(l)})^k(I - \gamma\widehat{P})^{-1}(\cdot, l)\|_{\ell^2(\nu)}$  and  $||[(\widehat{P}^k - (\widehat{P}^{(l)})^k)(I - \gamma\widehat{P})^{-1}](\cdot, l)|\|_{\ell^2(\nu)}$  respectively. We  
 1282 bound these terms as

$$\begin{aligned}\|\widehat{P}^{i-1}(\cdot, l)\|_{\ell^2(\nu)} &= \|\widehat{P}^{i-1}\mathbb{1}_l\|_{\ell^2(\nu)} \leq \|\widehat{P}^{i-1}\|_{\ell^2(\nu), \ell^2(\nu)} \|\mathbb{1}_l\|_{\ell^2(\nu)} = \|\widehat{P}^{i-1}\|_{\ell^2(\nu), \ell^2(\nu)} \sqrt{\nu(l)} \\ \|(\widehat{P}^{(l)})^k(I - \gamma\widehat{P})^{-1}(\cdot, l)\|_{\ell^2(\nu)} &\leq \|(\widehat{P}^{(l)})^k(I - \gamma\widehat{P})^{-1}\|_{\ell^2(\nu), \ell^2(\nu)} \sqrt{\nu(l)}\end{aligned}$$

1283 and

$$\begin{aligned}\|[(\widehat{P}^k - (\widehat{P}^{(l)})^k)(I - \gamma\widehat{P})^{-1}](\cdot, l)\|_{\ell^2(\nu)} &\leq \left( \|\widehat{P}^k(I - \gamma\widehat{P})^{-1}\|_{\ell^2(\nu), \ell^2(\nu)} \right. \\ &\quad \left. + \|(\widehat{P}^{(l)})^k(I - \gamma\widehat{P})^{-1}\|_{\ell^2(\nu), \ell^2(\nu)} \right) \sqrt{\nu(l)}\end{aligned}$$

1284 Suppose now that the terms of the right-hand side concentrate: then for some constant  $C > 0$ ,  
 1285 using that  $\nu$  is invariant we would get  $\|\widehat{P}^i\|_{\ell^2(\nu), \ell^2(\nu)} \leq C \|P^i\|_{\ell^2(\nu), \ell^2(\nu)} \leq C$  for all  $i \in [k]$ ,  
 1286  $\|(\widehat{P}^{(l)})^k(I - \gamma\widehat{P})^{-1}\|_{\ell^2(\nu), \ell^2(\nu)} \leq C \|M_{\pi, i}\|_{\ell^2(\nu)} \leq C/(1 - \gamma)$  and  $\|\widehat{P}^k(I - \gamma\widehat{P})^{-1}\|_{\ell^2(\nu)} \leq C/(1 -$   
 1287  $\gamma)$ . Then on this event reiterating the above argument would eventually give the bounds

$$\begin{aligned}\|[\widehat{P}^k - (\widehat{P}^{(l)})^k]B\|_{\ell^2(\nu), \ell^2(\rho)} &\leq C\sqrt{\nu(l)}kt, \\ \|(\widehat{P}^{(l)})^k[(I - \gamma\widehat{P})^{-1} - (I - \gamma\widehat{P}^{(l)})^{-1}]A\|_{\ell^2(\nu), \ell^2(\rho)} &\leq \frac{C\sqrt{\nu(l)}t}{(1 - \gamma)^2} \\ \|[\widehat{P}^k - (\widehat{P}^{(l)})^k][(I - \gamma\widehat{P})^{-1} - (I - \gamma\widehat{P}^{(l)})^{-1}]A\|_{\ell^2(\nu), \ell^2(\rho)} &\leq \frac{2C\sqrt{\nu(l)}t}{(1 - \gamma)^2}\end{aligned}$$

1288 with probability at least  $1 - (k + 2)(p + 1) \exp\left(\frac{-t^2(1 - \gamma)^2 Z_l}{2 \max(k, (1 - \gamma)^{-1})^2 \|A\|_{\ell^2(\rho), \ell^\infty}^2}\right)$ , conditional on  $(Y_i)_{i \neq l}$   
 1289 and thus also unconditional. We then deduce

$$\begin{aligned}\mathbb{P}\left[\|\widehat{M}_{\pi, k}A - \widehat{M}_{\pi, k}^{(l)}A\|_{\ell^2(\nu), \ell^2(\rho)} \geq t\right] &\leq (k + 2)(p + 1) \exp\left(\frac{-t^2 Z_l}{2C_{k, \gamma}^2 \nu(l) \|A\|_{\ell^2(\rho), \ell^\infty}^2}\right) \\ &\quad + \mathbb{P}\left[\exists i \in [k] : \|\widehat{P}^{i-1}\|_{\ell^2(\nu), \ell^2(\nu)} > C\right] \\ &\quad + \mathbb{P}\left[\|(\widehat{P}^{(l)})^k(I - \gamma\widehat{P})^{-1}\|_{\ell^2(\nu), \ell^2(\nu)} > C/(1 - \gamma)\right] \\ &\quad + \mathbb{P}\left[\|\widehat{P}^k(I - \gamma\widehat{P})^{-1}\|_{\ell^2(\nu), \ell^2(\nu)} > C/(1 - \gamma)\right].\end{aligned}$$

1290 The three remaining terms can be controlled by Theorem 7 and (24), which gives the second term in  
 1291 (23). We omit the details.  $\square$

## 1292 G Local mixing phenomena

1293 In this appendix we prove the results of Section 5. We start by proving Proposition 1 in §G.1. In  
 1294 §G.2, we explain how bounding the spectral recoverability reduces to bounding the  $2 - \infty$  norm, at  
 1295 least for *normal* chains. Then in §G.3, we give a detailed background on functional inequalities for  
 1296 Markov chains and explain how our results differ from the classical analysis of mixing times. Finally,  
 1297 in §G.4, we extend these inequalities and prove Theorems 2, 3, 4 and Proposition 2.

### 1298 G.1 Singular value bound: proof of Proposition 1

1299 Proposition 1 will be a straightforward application of the following, more general result. Here we  
 1300 consider the norms, singular values, etc. to be defined w.r.t. any probability measure.

1301 **Proposition 11.** *Let  $A \in \mathbb{R}^{n \times m}$ . For all  $\gamma \in (0, \|A\|_{2,2}^{-1})$ ,  $k \geq 0$ ,  $i \in [n]$ ,*

$$\frac{\sigma_i(A^k)}{1 + \gamma \|A\|_{2,2}} \leq \sigma_i(A^k(I - \gamma A)^{-1}) \leq \frac{\sigma_i(A^k)}{1 - \gamma \|A\|_{2,2}} \quad (65)$$

1302 *Consequently*

$$\left\| \left( \sum_{t \geq k} \gamma^t A^t \right) \right\|_{2,\infty} \geq \frac{\|A^k\|_F}{1 + \gamma \|A\|_{2,2}}. \quad (66)$$

1303 *Proof.* Using the classical inequality for singular values  $\sigma_n(A)\sigma_i(B) \leq \sigma_i(AB) \leq \sigma_1(A)\sigma_i(B)$   
 1304 (see e.g. (25)) valid for all matrices  $A, B$  and  $i$ , we get

$$\sigma_n((I - \gamma A)^{-1})\sigma_i(A^k) \leq \sigma_i(A^k(I - \gamma A)^{-1}) \leq \sigma_1((I - \gamma A)^{-1})\sigma_i(A^k).$$

1305 Now simply notice  $\sigma_1((I - \gamma A)^{-1}) = \|(I - \gamma A)^{-1}\|_{2,2} \leq (1 - \gamma \|A\|_{2,2})^{-1}$  and  $\sigma_1(I - \gamma A) =$   
 1306  $\|I - \gamma A\|_{2,2} \leq 1 + \gamma \|A\|_{2,2}$ , hence

$$\sigma_n((I - \gamma A)^{-1}) = \frac{1}{\sigma_1(I - \gamma A)} \geq \frac{1}{1 + \gamma \|A\|_{2,2}}.$$

1307 Summing over  $i$  and using (13) yields

$$\left\| \left( \sum_{t \geq k} \gamma^t A^t \right) \right\|_{2,\infty} \geq \left\| \left( \sum_{t \geq k} \gamma^t A^t \right) \right\|_F \geq \frac{\|A^k\|_F}{1 + \gamma \|A\|_{2,2}}.$$

1308 □

1309 *Proof of Proposition 1.* Apply the previous Proposition with  $A = P_\pi$  and note that if the underlying  
 1310 probability measure is invariant then  $\|P_\pi\|_{2,2} = 1$ . □

### 1311 G.2 Spectral recoverability for chains with normal transition matrices

1312 From Definition 3 and (12), for any matrix  $A$  with SVD  $A = U\Sigma V^\dagger$ , we can express  $\xi(A) =$   
 1313  $\left\| |A|^{1/2} \right\|_{2,\infty}^2$  where the absolute square root is defined by  $|A|^{1/2} := U\Sigma^{1/2}V^\dagger$ . When  $A = P^{2k}$  is an  
 1314 even power of  $P$ , it is thus tempting to try relating  $\xi(P^{2k})$  with  $\|P^k\|_{2,\infty}^2$ . However we do not know  
 1315 how to achieve this, as the singular vectors of  $P^k$  and  $P^{2k}$  may be very different. A case where this  
 1316 is possible is when we assume the chain to be reversible or more generally normal (11), in the sense  
 1317 that  $PP^\dagger = P^\dagger P$ . By the spectral theorem, such matrices are diagonalizable in orthonormal basis,  
 1318 making the singular vectors coincide with eigenvectors.

1319 **Lemma 15.** *Suppose  $PP^\dagger = P^\dagger P$ . Then for all  $k \geq 0$ ,*

$$\xi(P^{2k}) \leq \|P^k\|_{2,\infty}^2.$$

1320 *Similarly  $\xi(M_{2k}) \leq (1 - \gamma\sigma_1(P))^{-1} \|M_k\|_{2,\infty}^2$  where we recall  $M_k := P^k(I - \gamma P)^{-1}$*

1321 *Proof.* Let  $P := \sum_i \sigma_i \psi_i \phi_i^\dagger$  be the SVD of  $P$ . By normality and the spectral theorem, the singular  
 1322 vectors coincide with eigenvectors, so the SVD of  $P^k$  is  $P^k = \sum_i \sigma_i^k \psi_i \phi_i^\dagger$  for all  $k \geq 0$ . Consequently

$$\xi(P^{2k}) = \max_x \sum_i \sigma_i(P^{2k}) \psi_i(x)^2 = \max_x \sum_i \sigma_i(P^k)^2 \psi_i(x)^2 = \|P^k\|_{2,\infty}^2.$$

1323 For the shifted successor measure, the singular values of  $M_k$  are  $\sigma_i^k(1 - \gamma\sigma_i)^{-1}$  hence

$$\begin{aligned} \xi(M_{2k}) &= \max_x \sum_i \sigma_i(P^k)^2 (1 - \sigma_i(P))^{-1} \psi_i(x)^2 \\ &\leq (1 - \gamma\sigma_1(P))^{-1} \max_x \sum_i \sigma_i(P^k)^2 \psi_i(x)^2 \\ &= (1 - \gamma\sigma_1(P))^{-1} \|P^k\|_{2,\infty}^2. \end{aligned}$$

1324

□

1325 We leave as an open problem the question of how to extend this result to non-normal chains, but  
 1326 consider it as a heuristic proof that having  $\xi(P^k)$  bounded should in general be essentially the same  
 1327 as having  $\|P^k\|_{2,\infty}^2$  bounded, up to multiplying  $k$  by 2.

### 1328 G.3 Functional inequalities for Markov chains

1329 From now on, we consider  $P \in \mathbb{R}^{n \times n}$  to be the transition matrix of an irreducible Markov chain with  
 1330 invariant measure  $\nu$ . Using the framework of A.1, the underlying measure will here be  $\nu$  until further  
 1331 notice.

1332 Identifying  $\nu$  with a row vector, the rank one matrix  $\mathbb{1}\nu$  is the matrix of the chain at stationarity,  
 1333 and it is readily seen from (11) that  $\|P^t - \mathbb{1}\nu\|_{2,\infty} = \|P^t\|_{2,\infty} - 1$ . It makes sense to define the  
 1334  $\ell^2$ -mixing time as  $t_2(\varepsilon) := \inf\{t \geq 0 : \|P^t - \mathbb{1}\nu\|_{2,\infty} \leq \varepsilon\}$ , which may be infinite. We also write  
 1335  $\mathbb{E}_\nu[f] := \sum_x \nu(x) f(x)$  and  $\text{Var}_\nu(f) = \mathbb{E}_\nu[f^2] - \mathbb{E}_\nu[f]^2$ .

1336 Recall the definition of the Dirichlet form

$$\mathcal{E}_{PP^\dagger}(f, g) = \langle (I - P)f, g \rangle_\nu. \quad (67)$$

1337 *Remark 1.* We consider the Dirichlet form of the multiplicative reversibilization  $PP^\dagger$ , which appears  
 1338 naturally when working with discrete-time Markov chains (20). The arguments that follow also  
 1339 extend, and in fact are simpler, for continuous-time Markov chains, for which we can directly work  
 1340 with  $P$ . We refer to (43) for a comprehensive reference. It is also possible to reduce to considerations  
 1341 on  $P$  only with laziness, i.e. if the chain has a uniformly lower bounded probability to stay put. If  
 1342  $P(x, x) \geq \alpha$  for all  $x \in [n]$ , (43, Equation (1.12)) shows that  $\mathcal{E}_{PP^\dagger} \geq 2\alpha \mathcal{E}_P(f, f)$ .

1343 The argument behind the use of functional inequalities is as follows: by duality (9),  $\|P^t\|_{2,\infty} =$   
 1344  $\|(P^t)^\dagger\|_{1,2} = \sup_{\|f\|_1=1} \|(P^t)^\dagger f\|_2$ . Therefore it suffices to bound  $\|(P^t)^\dagger f\|_2$  for all  $f \in \mathbb{R}^n$ . Now  
 1345 for fixed  $f$ , it is easy to compute

$$\|(P^t)^\dagger f\|_2^2 - \|(P^{t-1})^\dagger f\|_2^2 = -\mathcal{E}_{PP^\dagger}((P^{t-1})^\dagger f, (P^{t-1})^\dagger f). \quad (68)$$

1346 (This is really a discrete counterpart of differentiating  $\|P^t f\|_2$ ). The goal of using functional  
 1347 inequalities is thus to obtain a lower bound  $\mathcal{E}_{PP^\dagger}(g, g) \geq F(\|g\|_2^2)$  valid for all  $g$  such that  $\|g\|_1 = 1$ ,  
 1348 that can be "integrated" to get estimates on  $\|P^t f\|_2$  and eventually on  $\|P^t\|_{2,\infty}$ . The most classical  
 1349 inequalities are Poincaré (20), log-Sobolev (15) and Nash inequalities (16), to which we can also  
 1350 add the spectral profile technique, which stems from Faber-Krahn inequalities (22). We focus in this  
 1351 paper on Poincaré, which are the simplest to establish, and Nash inequalities, which served as our  
 1352 main inspiration and can prove complementary to Poincaré inequalities.

1353 **Poincaré inequality:** the classical Poincaré inequality takes the form

$$\forall f \in \mathbb{R}^n : \quad \lambda \operatorname{Var}_\nu(f) \leq \mathcal{E}_{PP^\dagger}(f, f), \quad (69)$$

1354 for some constant  $\lambda \geq 0$ . Plugged in (68) and applying the above argument, it implies the decay rate  
 1355  $\|P^t - \mathbb{1}\nu\|_{2,\infty} \leq (1 - \lambda)^t \nu_{\min}^{-1}$  (see Corollary 1.14 of (43)). This gives in particular a bound on the  
 1356 mixing time:

$$t_2(\varepsilon) \leq \lambda^{-1} \log(\nu_{\min}^{-1} \varepsilon^{-1}). \quad (70)$$

1357 For our purpose of applying Theorem 1, we do not require that strong mixing estimates: we could be  
 1358 content with  $\|P^t\|_{2,\infty} = O(1)$ , which could occur on time scales much smaller than the mixing time.  
 1359 The Nash inequalities of (16) were introduced precisely to get such decay rates, when the Poincaré  
 1360 inequality alone is not sharp. Nash inequalities are however notoriously difficult to establish.

1361 **Nash inequalities:** in view of (48), we distinguish two types of Nash inequalities, which we call  
 1362 type I and type II

1363 • Type I reads

$$\operatorname{Var}_\nu(f)^{1+2/d} \leq C \mathcal{E}_{PP^\dagger}(f, f) \|f\|_1^{4/d} \quad (71)$$

1364 for some constants  $C, d > 0$ . Plugged in (68) and applying Lemma 3.1 of (16) yields the  
 1365 bound

$$\|P^k - \mathbb{1}\nu\|_{2,\infty}^2 \leq \left( \frac{C(1 + \lceil d \rceil)}{k + 1} \right)^{d/2}$$

1366 which in turn gives the mixing time bound  $t_2(\varepsilon) \leq \frac{C(1+\lceil d \rceil)}{\varepsilon^{2/d}}$ .

1367 Using Jensen's inequality, we also see that (71) implies a Poincaré inequality  $\operatorname{Var}_\nu(f) \leq$   
 1368  $C \mathcal{E}_P(f, f)$ . Thus Nash inequality can be combined or used in place of the Poincaré  
 1369 inequality to get rid of the  $\log(\nu_{\min}^{-1})$  factor in (70). This is generally sharp for "low-  
 1370 dimensional chains" like random walk on grids, where the constant  $d$  that appears in the  
 1371 Nash inequality coincides with the dimension parameter.

1372 • Type II has the form

$$\|f\|_2^{2(2+2/d)} \leq C \left( \mathcal{E}_{PP^\dagger}(f, f) + \frac{1}{T} \|f\|_2^2 \right) \|f\|_1^{4/d} \quad (72)$$

1373 for some constant  $C, d, T > 0$ . Theorem 3.1 and Remark 3.1 of (16) show that this implies  
 1374 the decay

$$\forall k \in [0, T] : \quad \|P^t\|_{2,\infty}^2 \leq \left( \frac{C(1 + 1/T)(1 + \lceil d \rceil)}{k + 1} \right)^{d/2}.$$

1375 Unlike the type I inequality, (72) implies no Poincaré inequality and no mixing time estimate.  
 1376 Note also that by moving the expectation term of  $\operatorname{Var}_\nu(f)$  to the right hand side, a type I  
 1377 inequality (71) implies a type II inequality with a slightly worse constant  $C$  and  $T = 1/C$ .

## 1378 G.4 Type II Poincaré inequalities and applications

### 1379 G.4.1 Proofs of Theorems 2 and 3

1380 As seen above, Nash inequalities, when they can be established at all, provide only a polynomial  
 1381 decay of the  $2 - \infty$  norm. To obtain an exponential decay, we consider extending Poincaré inequalities  
 1382 instead. The clear analogy between (71) and (69) motivated us to develop analogous "type II" versions  
 1383 of the Poincaré inequality, that incorporate an additive  $\ell^1$  term. This is exactly the result of Theorem  
 1384 2, which we now prove.

1385 *Proof of Theorem 2.* We use the argument sketched in the previous section. Let  $f \in \mathbb{R}^n$  be such that  
 1386  $\|f\|_1 = 1$  and set  $u_t := \|(P^t)^\dagger f\|_2^2$ . Note that  $\|(P^t)^\dagger f\|_1 \leq \|(P^t)^\dagger\|_{1,1} \|f\|_1$ , however by duality (9)  
 1387  $\|P^\dagger\|_{1,1} = \|P\|_{\infty,\infty} = 1$ . Thus  $\|(P^t)^\dagger f\|_1 \leq 1$  for all  $t \geq 0$ . Consequently, the type II inequality (5)  
 1388 plugged in (68) yields

$$u_t - u_{t-1} \leq -\lambda u_{t-1} + \lambda C$$

1389 which in turn gives  $u_t = \|(P^t)^\dagger f\|_2 \leq (1 - \lambda)^t(u_0 - C) + C$  by an easy induction. Then remark  
 1390 that  $u_0 = \|f\|_2^2 \leq \nu_{\min}^{-1} \|f\|_1^2 = \nu_{\min}^{-1}$ . Since this is valid for all  $f$  such that  $\|f\|_1 = 1$  we deduce  
 1391  $\|(P^t)^\dagger\|_{1,2} = \|P^t\|_{2,\infty} \leq (1 - \lambda)^t(\nu_{\min}^{-1} - C) + C$ .  $\square$

1392 *Remark 2.* The same arguments could be applied by exchanging  $P$  and  $P^\dagger$  to give a similar bound  
 1393 for  $\|(P^k)^\dagger\|_{2,\infty}$ , as is required for Theorem 1. There is one difference however in that we need the  
 1394 invariance of  $\nu$  to have  $\|P^\dagger\|_{\infty,\infty} = 1$ .

1395 *Proof of Theorem 3.* Let  $f \in \mathbb{R}^n$  and write  $f_r := U_r U_r^\dagger f$  for its projection onto the  $r$  first singular  
 1396 vectors. Note that  $\mathcal{E}_{PP^\dagger}(f - f_r, f_r) = 0$  and hence

$$\mathcal{E}_{PP^\dagger}(f, f) = \mathcal{E}_{PP^\dagger}(f_r, f_r) + \mathcal{E}_{PP^\dagger}(f - f_r, f - f_r).$$

1397 If the underlying measure is invariant,  $PP^\dagger$  is a stochastic matrix so Lemma 12 implies that  $I - PP^\dagger \geq$   
 1398 0 and thus  $\mathcal{E}_{PP^\dagger}(f, f) \geq \mathcal{E}_{PP^\dagger}(f - f_r, f - f_r)$ . Thus the Courant-Fischer theorem (25, Theorem  
 1399 3.1.2) gives

$$\lambda_{r+1} \|f - f_r\|_2^2 \leq \mathcal{E}_{PP^\dagger}(f - f_r, f - f_r) \leq \mathcal{E}_{PP^\dagger}(f, f)$$

1400 where we write  $\lambda_{r+1} = 1 - \sigma_{r+1}^2$ . On the other hand use Hölder's inequality to bound

$$\|f\|_2^2 = \langle f - f_r, f \rangle + \langle f_r, f \rangle \leq \|f - f_r\|_2 \|f\|_2 + \|f_r\|_\infty \|f\|_1.$$

1401 Observe then that

$$\|f_r\|_\infty = \|U_r U_r^\dagger f\|_\infty \leq \|U_r\|_{2,\infty} \|f\|_2,$$

1402 so after simplifying by  $\|f\|_2$ , we deduce

$$\lambda_{r+1}^{1/2} \|f\|_2 \leq \mathcal{E}_{PP^\dagger}(f, f)^{1/2} + \lambda_{r+1}^{1/2} \|U_r\|_{2,\infty} \|f\|_1.$$

1403 Using  $(a + b)^2 \leq 2(a^2 + b^2)$ , we finally get

$$\frac{\lambda_{r+1}}{2} \|f\|_2^2 \leq \mathcal{E}_{PP^\dagger}(f, f) + \lambda_{r+1} \|U_r\|_{2,\infty}^2 \|f\|_1^2.$$

1404  $\square$

## 1405 G.4.2 Combining inequalities of induced chains

1406 In (16), Diaconis and Saloff-Coste showed how to establish type II Nash inequalities from local  
 1407 Poincaré inequalities. This suggested that type II inequalities are related to a local notion of mixing,  
 1408 which we establish formally in Proposition 2. Given the definition of induced chains (Definition 4) it  
 1409 is immediate that for all  $f \in \mathbb{R}^n$

$$\begin{aligned} \mathcal{E}_{\nu,P}(f, f) &\geq \mathcal{E}_{\nu,P_S}(f, f) + \mathcal{E}_{\nu,P_{S^c}}(f, f) \\ &= \nu(S) \mathcal{E}_{\nu_S,P_S}(f|_S, f|_S) + \nu(S^c) \mathcal{E}_{\nu_{S^c},P_{S^c}}(f|_{S^c}, f|_{S^c}). \end{aligned} \quad (73)$$

1410 On the other hand it is also straightforward that  $\|f\|_{\ell^p(\nu)}^p = \nu(S) \|f|_S\|_{\ell^p(\nu_S)}^p + \nu(S^c) \|f|_{S^c}\|_{\ell^p(\nu_{S^c})}^p$   
 1411 for all  $p \in [1, \infty)$ . Our decomposition result is based on these two simple facts.

1412 *Proof of Proposition 2.* The result is a consequence of the following inequalities:

$$\begin{aligned} \|f\|_{\ell^2(\nu)}^2 &= \nu(S) \|f|_S\|_{\ell^2(\nu_S)}^2 + \nu(S^c) \|f|_{S^c}\|_{\ell^2(\nu_{S^c})}^2 \\ &\leq \nu(S) \left[ \lambda_S^{-1} \mathcal{E}_{\nu_S,P_S}(f|_S, f|_S) + C_S \|f|_S\|_{\ell^1(\nu_S)}^2 \right] \\ &\quad + \nu(S^c) \left[ \lambda_{S^c}^{-1} \mathcal{E}_{\nu_{S^c},P_{S^c}}(f|_{S^c}, f|_{S^c}) + C_{S^c} \|f|_{S^c}\|_{\ell^1(\nu_{S^c})}^2 \right] \\ &\leq \min(\lambda_S, \lambda_{S^c})^{-1} \mathcal{E}_{\nu,P}(f, f) + \max\left(\frac{C_S}{\nu(S)}, \frac{C_{S^c}}{\nu(S^c)}\right) (\|f|_S\|_{\ell^1(\nu)}^2 + \|f|_{S^c}\|_{\ell^1(\nu)}^2) \\ &\leq \min(\lambda_S, \lambda_{S^c})^{-1} \mathcal{E}_{\nu,P}(f, f) + \max\left(\frac{C_S}{\nu(S)}, \frac{C_{S^c}}{\nu(S^c)}\right) \|f\|_{\ell^1(\nu)}^2. \end{aligned}$$



1413 The equality uses that  $S, S^c$  are disjoint, the first inequality comes from applying the Poincaré inequalities, the second uses (73) and  $\nu(S) \|f|_S\|_{\ell^1(\nu_S)} = \|f|_S\|_{\ell^1(\nu)}$ , the last inequality is a consequence of  
1414  $a^2 + b^2 \leq (a + b)^2$  for  $a, b \geq 0$ .  $\square$

1416 Proposition 2 requires functional inequalities for induced chains, with respect to the induced measures. It is wrong in general that the induced measures are invariant for the induced chains, but it is true for reversible chains (29). For completeness, we prove it in the following Lemma, to justify the consideration of induced chains with induced measures. We recall a chain is reversible if it satisfies the detailed balance equation, which translates matricially into  $P^\dagger = P$ .

1421 **Lemma 16.** *Suppose  $P$  is a reversible Markov chain on  $[n]$  with invariant measure  $\nu$ . Then for all subset  $S \subset [n]$  the restriction  $\nu|_S$  to  $S$  is invariant for the induced chain  $P_S$ .*

1423 *Proof.*  $P$  is reversible if and only if it satisfies the detailed balanced equation  $\nu(x)P(x, y) = \nu(y)P(y, x)$  for all  $x, y \in [n]$ . Taking the induced chain on  $S$  does not affect the transition probabilities between  $x \neq y$  in  $S$ , so the equation still holds for the induced chain and the measure induced by  $\nu$ .  $\square$

#### 1427 G.4.3 The 4-room examples: proof of Theorem 4

1428 We now proceed to prove the bounds for the 4-room environment of Theorem 4.

1429 *Proof of Theorem 4.* As a random walk on a graph  $P$  is reversible with invariant measure being given by  $\nu(x) = \deg(x) / \sum_y \deg(y)$ , where  $\deg(x)$  denotes the degree of  $x$ . Thus we need to consider the Dirichlet form of  $PP^\dagger = P^2$ . The latter is also reversible hence by Lemma 16, so are all induced chains  $(P^2)_{|G_i}$  with the induced measures as invariant measures. Now for each  $i \in [4]$ ,  $(P^2)_{|G_i}$  satisfies a type II Poincaré inequality: namely for all  $f \in \mathbb{R}^{G_i}$

$$\lambda_i \|f\|_{\ell^2(\nu_{V_i})}^2 \leq \mathcal{E}_{(P^2)_{|G_i}}(f, f) + \lambda_i \|f\|_{\ell^1(\nu_{V_i})}^2$$

1434 with  $\lambda_i = 1 - \sigma_2((P^2)_{|G_i})$  the spectral gap of the p.s.d. matrix  $(P^2)_{|G_i}$ . This is a consequence of the Courant-Fischer theorem as for Theorem 3. It is thus a simple application of Proposition 2 that the whole chain satisfies

$$(1 - \lambda) \|f\|_{\ell^2(\nu)}^2 \leq \mathcal{E}_{P^2}(f, f) + \frac{1 - \lambda}{\min_i \nu(V_i)} \|f\|_{\ell^1(\nu)}^2.$$

1437 with  $\lambda := \min_i \lambda_i$ , which by Theorem 2 implies the decay rate

$$\|P^t\|_{2, \infty}^2 \leq (1 - \lambda)^t \nu_{\min}^{-1} + \frac{1}{\min_i \nu(V_i)}.$$

1438 This proves the first part of the theorem.

1439 For the second part, suppose that  $\min_i \nu(G_i) \geq c$ . Then for  $t \geq \lambda^{-1} \log(\nu_{\min}^{-1} \varepsilon^{-1})$  we obtain  $\|P^t\|_{2, \infty}^2 \leq \varepsilon + c^{-1}$ . Since the chain is reversible we can use Lemma 15 to bound the spectral recoverability as well and get  $\xi(P^{2t}) \leq \varepsilon + c^{-1}$ . Then Lemma 1 shows that  $\|P^{2t} - [P^{2t}]_r\|_{2, \infty} \leq \varepsilon$  for the smallest  $r$  such that  $\sigma_{r+1}(P^{2t}) \leq \varepsilon^2 / (c^{-1} + \varepsilon)$ . We claim that:

$$\sigma_5(P^{2s}) \leq (1 - \lambda)^s, \quad \text{for all } s \geq 0. \quad (74)$$

1443 Provided the claim holds, this implies that  $\sigma_5(P^{4t}) \leq e^{-2\lambda t} \leq \nu_{\min}^2 \varepsilon^2$  by the choice of  $t$ .

1444 Let us prove the claim (74). Note that by reversibility  $\sigma_5(P^{2t}) = \sigma_5(P^2)^t$  so it suffices to prove that  $1 - \sigma_5(P^2) \geq \lambda$ . From the Courant-Fischer theorem:

$$1 - \sigma_5(P^2) = \sup_{\text{codim } W=4} \inf_{\substack{f \in W \\ f \neq 0}} \frac{\mathcal{E}_{P^2}(f, f)}{\|f\|_2^2}.$$

1446 Let  $W$  be the subspace orthogonal to the subspace  $\text{Span}(\mathbb{1}_{G_i}, i \in [4])$  spanned by the indicator of  
 1447 each subgraph. It has codimension 4 so we can lower bound

$$1 - \sigma_5(P^2) \geq \inf_{\substack{f \in W \\ f \neq 0}} \frac{\mathcal{E}_{P^2}(f, f)}{\|f\|_2^2}$$

1448 for this particular subspace. Now decompose  $f = \sum_{i=1}^4 f|_{G_i}$ . As in (73) we can lower bound

$$\mathcal{E}_{P^2}(f, f) = \sum_{i=1}^4 \nu(G_i) \mathcal{E}_{\nu_{G_i}, (P^2)|_{G_i}}(f|_{G_i}, f|_{G_i}).$$

1449 Now observe that for each  $i$ , since  $\langle f, \mathbb{1}_{G_i} \rangle = \langle f|_{G_i}, \mathbb{1}_{G_i} \rangle = 0$  if  $f \in W$ , we can lower bound

$$\mathcal{E}_{\nu_{G_i}, (P^2)|_{G_i}}(f|_{G_i}, f|_{G_i}) \geq \lambda_i \|f|_{G_i}\|_{\ell^2(\nu_{G_i})}^2.$$

1450 Therefore

$$\begin{aligned} \mathcal{E}_P(f, f) &\geq \sum_{i=1}^4 \lambda_i \nu(G_i) \|f|_{G_i}\|_{\ell^2(\nu_{G_i})}^2 \\ &\geq \lambda \|f\|_{\ell^2(\nu)}^2 \end{aligned}$$

1451 which proves the claim. □

1452 *Remark 3.* We note that Theorem 4 is quite general and applies to arbitrary decompositions of the  
 1453 state space. However, our framework is particularly effective in scenarios where there is a significant  
 1454 gap between the global mixing time of the Markov chain and the local mixing time within each  
 1455 "room." In favorable cases—such as when each room is an expander graph—this difference can  
 1456 be substantial. In contrast, if each room is a 2D grid with  $n^2$  states and the policy corresponds  
 1457 to a random walk, the local mixing time scales as  $\mathcal{O}(n^2)$ , while the global mixing time scales as  
 1458  $\mathcal{O}(n^2 \log n)$ . This setup closely resembles the so-called " $n$ -dog" graph studied in Example 3.3.5 of  
 1459 (48), where two  $n \times n$  grids are connected at a single corner. In this case, the difference between  
 1460 local and global mixing is relatively mild. Nonetheless, in our numerical experiments, which include  
 1461 scenarios resembling this more challenging setting, we already observe significant gains from shifting  
 1462 the successor measure.

## 1463 H Further Numerical Experiments

1464 To complement the theoretical insights and main experimental findings, we provide additional  
 1465 numerical results that investigate the behavior of shifted successor measures across a wider range of  
 1466 settings. These experiments aim to probe the robustness and generality of our approach in different  
 1467 environments, under different data collection policies, and with both model-based and model-free  
 1468 estimators. All experiments were run on a single CPU and are reproducible within a day.

### 1469 H.1 The 4-room environment

1470 We now revisit the 4-room environment theoretically analyzed in Theorem 4, where the state space is  
 1471 partitioned into four well-connected regions (rooms) linked by narrow passageways. As discussed in  
 1472 the main text, this structure induces metastable behavior: the chain mixes rapidly within each room,  
 1473 while transitions between rooms are relatively infrequent. In this section, we additionally make the  
 1474 Markov chain aperiodic by allowing the agent to remain in its current state with probability 0.1.

1475 Figure 6 illustrates several empirical findings. On the left, we show the 15x15 discretization of  
 1476 the 4-room domain that we use in this section. In the center panel, we plot the singular values of  
 1477 the shifted successor measures  $M_{\pi,k}$  for various values of the shift  $k$ . As theoretically predicted,  
 1478 increasing  $k$  leads to a sharper spectral decay, indicating stronger low-rank structure. Notably, for  
 1479 higher shifts - when all states within a room are reachable - the effective rank is close to 4, matching  
 1480 the number of rooms.

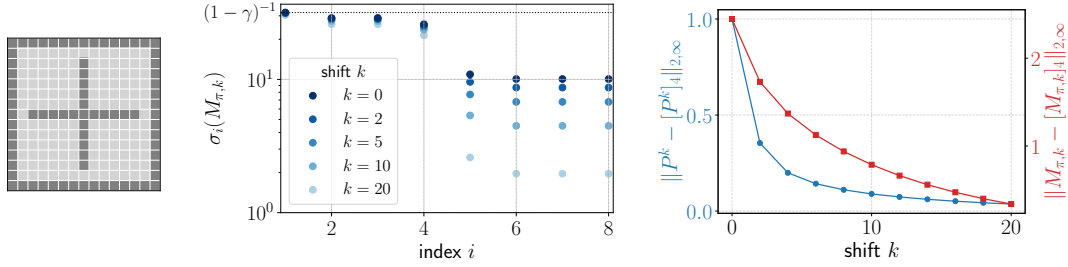

Figure 6: Left: 4-room environment with a 15x15 discrete space; Center: singular values of shifted successor measures  $M_{\pi,k}$  for various shifts  $k$  (uniform policy  $\pi$ , discount factor  $\gamma = 0.97$ ); Right: entrywise norm differences between  $P^k$  and its rank-4 approximation (blue circles), and between  $M_{\pi,k}$  and its rank-4 approximation (red squares). As in Figure 2, we use the standard  $\|\cdot\|_{2,\infty}$  norm, which coincides with the norm in Section 3.2 up to a  $\sqrt{n}$  multiplicative factor under the uniform measure  $\nu$ .

1481 On the right, we plot two metrics as a function of  $k$ : the entry-wise norms  $\|P^k - [P^k]_4\|_{2,\infty}$  and  
 1482  $\|M_{\pi,k} - [M_{\pi,k}]_4\|_{2,\infty}$ . Both metrics decay rapidly with  $k$ , consistent with the bounds in Theorem 4.  
 1483 The behavior confirms that moderate values of  $k$  (e.g.,  $k = 4 - 10$ ) are sufficient to approximate  
 1484  $P^k$  with a rank-4 matrix. While such a representation may suffice for navigating between rooms,  
 1485 accurately reaching specific target states within a room may require a higher-rank approximation.  
 1486 Nevertheless, shifting the successor measure consistently improves the learnability of low-rank  
 1487 representations.

1488 These results validate our theoretical predictions in a structured setting and demonstrate how temporal  
 1489 shifting can uncover the environment’s block structure. We next turn to more complex and less  
 1490 regular domains.

### 1491 H.2 Additional Navigation Tasks

1492 We now extend the results from Section 6 to additional environments of increasing complexity.  
 1493 Specifically, we evaluate the impact of shifting and low-rank approximation of successor measures in  
 1494 two additional mazes: the U-maze and the Large-maze. All three mazes are discretized versions of  
 1495 the Maze2D environments from (21).

Here we repeat the setup from Section 6 and provide additional details. Unless stated otherwise (as in Section H.3), all data is collected using a uniformly random policy. This simplifies the estimation process: under a uniform data distribution, the invariant measure  $\nu$  is uniform, and thus the measure-dependent norms introduced in Section 3.2 reduce to their standard variants. In particular, the  $\|\cdot\|_{2,\infty}$  norm and the singular value decomposition (SVD) used for low-rank approximation become standard.

Once the successor measures  $M_{\pi,k}$  are estimated, we evaluate policies that act greedily with respect to them. More specifically, given a current state  $s$  and a goal  $g$ , the policy selects actions according to:  $\operatorname{argmax}_{a \in \mathcal{A}} M_{\pi,k}(s, a, g)$ , where  $M_{\pi,k}(s, a, g) = \sum_{b \in \mathcal{A}} M_{\pi,k}((s, a), (g, b))$  denotes the marginalized successor measure, as described in Section 6. In the low-rank setting, the same greedy procedure is applied to the rank- $r$  approximation  $[M_{\pi,k}]_r$ . To quantify goal-reaching performance and evaluate the obtained policy, we report two metrics: accuracy, the probability of reaching the exact goal (from a random initial state), and relaxed accuracy, the probability of reaching any state within two steps of the goal.

Figures 7 and 8 mirror the structure of Figure 4 in the main paper. In each case, we compare unshifted and shifted successor measures across several metrics: spectrum decay (panel b), goal-reaching accuracy using ground-truth successor measures (panels c–d), performance of TD-learned measures (panels e–f), and sample efficiency as a function of dataset size (panels g–h).

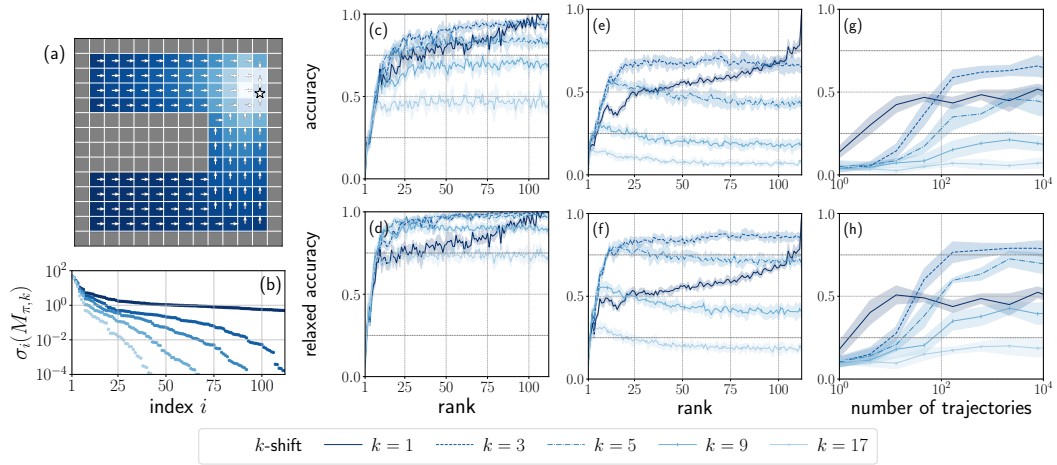

Figure 7: Successor measure analysis in the U-maze environment with  $\gamma = 0.98$  and uniformly random policy  $\pi$ . TD estimates use 10k trajectories of length  $H = 100$ ; rank is fixed to 40 in (g–h). Results are averaged over 5 seeds and 100 random goals and initial positions.

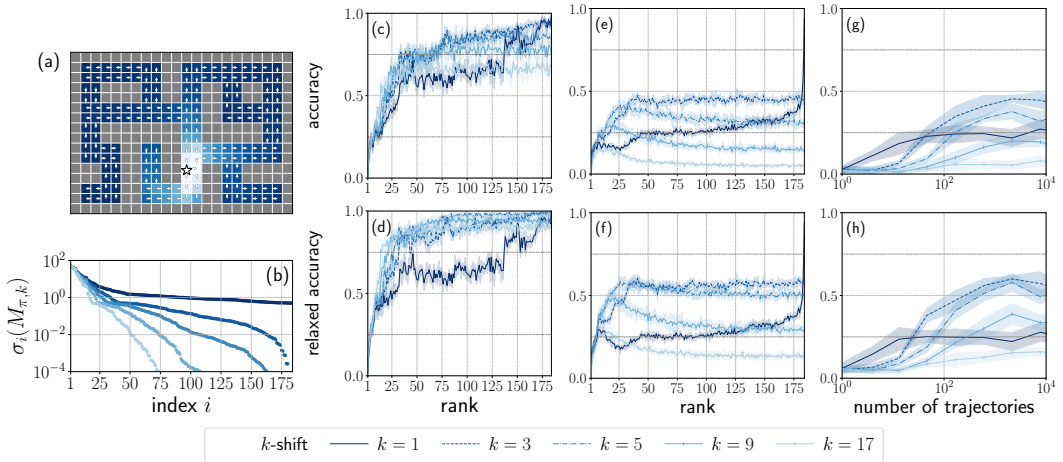

Figure 8: Same setup as in Figure 7, now for the Large-maze environment. Rank is fixed to 60 in (g–h). All results are averaged over 5 seeds and 100 random goals and initial positions.

1513 In both environments, we observe a consistent pattern: shifting enhances spectral decay (Figure 7b  
 1514 and 8b), making the structure more amenable to low-rank approximation. When true successor  
 1515 measures are available (panels c–d), moderate shift values yield better planning performance at low  
 1516 ranks, consistent with our observations in the Medium-maze environment. However, beyond a certain  
 1517 point, excessive shifting discards too much information, leading to worse performance. This effect  
 1518 is more pronounced when successor measures are learned (panels e–f), likely due to compounding  
 1519 estimation error over long horizons.

1520 Finally, we evaluate how accuracy varies with the number of trajectories (panels g–h). As in the main  
 1521 experiments, moderate shifts ( $k = 3$  or  $k = 5$ ) often strike the best balance between representational  
 1522 power and sample efficiency. The trade-off seen in Figure 4 g–h, where small shifts underexploit  
 1523 structure and large shifts overburden estimation, persists across these environments.

1524 Overall, these experiments reinforce our findings from Section 6 and demonstrate the robustness of  
 1525 temporal shifting across domains. Even in larger and more complex mazes, appropriately calibrated  
 1526 shifting enables more compact representations, improves planning accuracy, and enhances sample  
 1527 efficiency.

### 1528 H.3 Non-uniform Data Collecting Policy

1529 In contrast to the previous experiments that used a uniformly random data-collection policy, we  
 1530 now evaluate a mixed policy composed of 80% uniformly random actions and 20% averaged goal-  
 1531 conditioned behavior. Specifically, the latter operates by sampling a goal uniformly at random  
 1532 and following the optimal policy to reach it, repeating this process for all goals (corresponding to  
 1533  $\pi_{\mathcal{D}}(a|s) = \int_{\mathcal{S}} \pi_g(a|s) d\rho_{\mathcal{D}}(g)$  from Section 6 with uniform  $\rho_{\mathcal{D}}$ ). As shown in the leftmost panel of  
 1534 Figure 9, this results in a non-uniform invariant measure  $\nu$ , with states near the geometric center of  
 1535 the maze being visited more frequently.

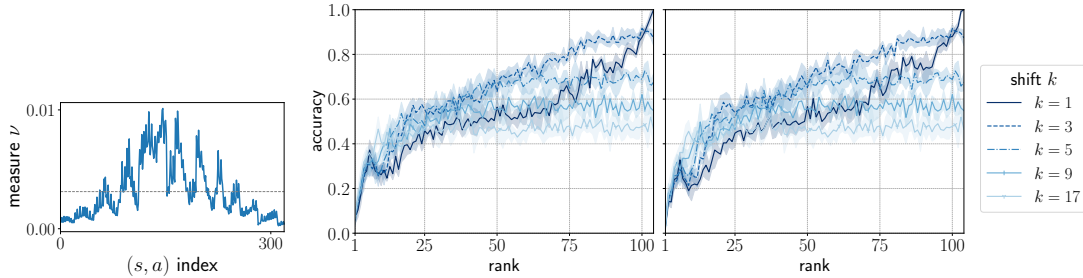

Figure 9: Left: invariant measure  $\nu$  with respect to  $M_{\pi}$ , dashed line represents uniform distribution. Center/right: accuracy vs. rank for standard SVD and  $\nu$ -SVD, same setting as in Figure 4c), with only the data-collection policy modified.

1536 To account for this skewed distribution, we use the  $\nu$ -  
 1537 weighted SVD (as described in Section 3.2) when comput-  
 1538 ing low-rank approximations of  $M_{\pi,k}$ . Figure 10 shows  
 1539 that the reconstructions obtained with  $\nu$ -SVD differ signif-  
 1540 icantly from those of the standard SVD, especially at low  
 1541 ranks. However, despite this discrepancy, goal-reaching  
 1542 performance remains nearly unchanged, as seen in the  
 1543 center and right panels of Figure 9.

1544 All experiments were performed in the Medium-maze  
 1545 using the same setting as in Section 6. Interestingly, the  
 1546 results suggest that the uniformly random policy actually  
 1547 yields slightly better performance at low ranks (compare  
 1548 with Figure 4c), suggesting that more uniform exploration  
 1549 may facilitate learning better goal-reaching representations.

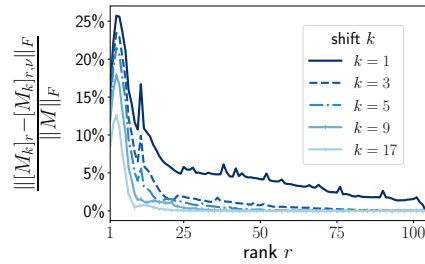

Figure 10: Relative Frobenius difference between rank- $r$  approximations of  $M_{\pi,k}$  using standard SVD vs.  $\nu$ -SVD.

#### 1550 H.4 Model-Based Estimation of Shifted Successor Measures

1551 We now compare temporal-difference (TD) learning with a simple model-based (MB) approach for  
 1552 estimating shifted successor measures. In the model-based case, we first estimate the transition matrix  
 1553  $P_\pi$  from data, and then compute the shifted successor measure  $M_{\pi,k} = \sum_{t=0}^{\infty} \gamma^t P_\pi^{t+k}$  using a truncated  
 1554 power series expansion. Figure 11 (left) reproduces the TD-based results from Figure 4 (g) in the  
 1555 Medium-maze, while Figure 11 (right) shows the corresponding performance of the model-based  
 1556 estimator.

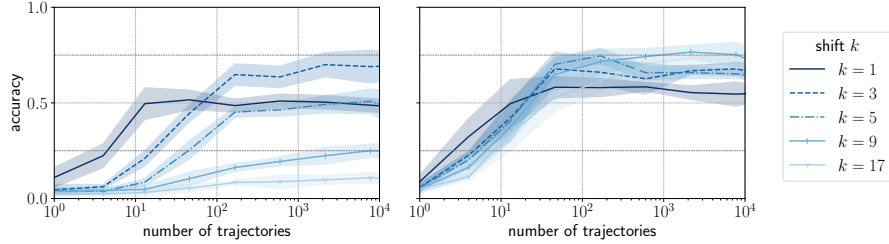

Figure 11: Goal-reaching accuracy in the Medium-maze using TD (left) and model-based (right) estimation. In both cases, we use trajectories of length 100, collected with a uniformly random policy,  $\gamma = 0.95$  and fixed rank  $r = 40$ .

1557 We observe that the model-based approach maintains higher goal-reaching accuracy even for larger  
 1558 shift values  $k$ . This is expected: unlike TD, which relies on sparse, temporally aligned supervision  
 1559 (i.e., observing specific  $(s_t, a_t, s_{t+k+1})$  transitions), the model-based method can leverage all available  
 1560 transitions to estimate  $P_\pi$ , making it less sensitive to the horizon length. In particular, long-range  
 1561 transitions needed for higher shifts are harder to estimate via TD when data is limited, whereas they  
 1562 are implicitly captured in  $P_\pi$  and recovered through matrix powers in the MB estimator.

1563 While model-based estimation proves more robust in this tabular setting, it does not easily scale  
 1564 to environments with large or continuous state spaces. Storing and computing with full transition  
 1565 matrices becomes infeasible, making function approximation challenging. In such cases, TD learning  
 1566 might be more practical and scalable despite its limitations with longer shifts.

#### 1567 H.5 Extension to the Non-Tabular Setting

1568 A natural question is whether the benefits of shifted successor measures observed in discrete maze  
 1569 environments carry over to more complex settings with stochastic dynamics and continuous state-  
 1570 action spaces. We believe that learning shifted successor measures may yield similar benefits in  
 1571 such environments - particularly in cases where learning the standard, non-shifted successor measure  
 1572 proves challenging.

1573 While we do not provide formal guarantees under function approximation, we believe similar effects  
 1574 are likely to emerge in practice. This intuition aligns with prior work on hierarchical reinforcement  
 1575 learning (ex. (44; 45)), where high-level policies capture the coarse structure of the task and steer  
 1576 the agent toward the vicinity of its goal. It would be interesting to explore whether shifted successor  
 1577 measures could similarly encode such high-level behaviors.

1578 One particularly promising direction is contrastive learning. For example, (19) samples positive ex-  
 1579 amples from a geometrically distributed time offset governed by the discount factor  $\gamma$ . To incorporate  
 1580 a shift  $k$ , one could instead sample the offset from  $\text{Geom}(1 - \gamma) + k$ , effectively biasing learning  
 1581 toward more temporally distant predictions.

1582 By contrast, extending these ideas to Forward-Backward (FB) algorithm of (56) is less straightforward.  
 1583 A key strength of FB is its ability to learn from one-step transitions  $(s_t, a_t, s_{t+1})$  independently of the  
 1584 data collection policy. How to integrate a meaningful notion of temporal shift into such a framework  
 1585 remains an open and intriguing challenge.

1586 We see these directions as promising opportunities to extend the benefits of temporal shifting beyond  
 1587 tabular settings, and hope that the theoretical insights in this work will help guide future progress in  
 1588 more realistic domains.

## NeurIPS Paper Checklist

### 1. Claims

Question: Do the main claims made in the abstract and introduction accurately reflect the paper's contributions and scope?

Answer: [\[Yes\]](#)

Justification: The main claims stated in the abstract and introduction are accurately reflected in the body of the paper. Our theoretical contributions are formalized and proved in Sections 4 and 5 through a series of theorems and propositions. Furthermore, we support our claims with numerical experiments presented in Section 6, which illustrate and validate the theoretical findings.

Guidelines:

- The answer NA means that the abstract and introduction do not include the claims made in the paper.
- The abstract and/or introduction should clearly state the claims made, including the contributions made in the paper and important assumptions and limitations. A No or NA answer to this question will not be perceived well by the reviewers.
- The claims made should match theoretical and experimental results, and reflect how much the results can be expected to generalize to other settings.
- It is fine to include aspirational goals as motivation as long as it is clear that these goals are not attained by the paper.

### 2. Limitations

Question: Does the paper discuss the limitations of the work performed by the authors?

Answer: [\[Yes\]](#)

Justification: The paper is primarily theoretical in nature, and we carefully discuss the assumptions, scope, and implications of our results at the points where they are introduced. Additionally, we address the limitations of our numerical experiments in detail in Appendix H.

Guidelines:

- The answer NA means that the paper has no limitation while the answer No means that the paper has limitations, but those are not discussed in the paper.
- The authors are encouraged to create a separate "Limitations" section in their paper.
- The paper should point out any strong assumptions and how robust the results are to violations of these assumptions (e.g., independence assumptions, noiseless settings, model well-specification, asymptotic approximations only holding locally). The authors should reflect on how these assumptions might be violated in practice and what the implications would be.
- The authors should reflect on the scope of the claims made, e.g., if the approach was only tested on a few datasets or with a few runs. In general, empirical results often depend on implicit assumptions, which should be articulated.
- The authors should reflect on the factors that influence the performance of the approach. For example, a facial recognition algorithm may perform poorly when image resolution is low or images are taken in low lighting. Or a speech-to-text system might not be used reliably to provide closed captions for online lectures because it fails to handle technical jargon.
- The authors should discuss the computational efficiency of the proposed algorithms and how they scale with dataset size.
- If applicable, the authors should discuss possible limitations of their approach to address problems of privacy and fairness.
- While the authors might fear that complete honesty about limitations might be used by reviewers as grounds for rejection, a worse outcome might be that reviewers discover limitations that aren't acknowledged in the paper. The authors should use their best judgment and recognize that individual actions in favor of transparency play an important role in developing norms that preserve the integrity of the community. Reviewers will be specifically instructed to not penalize honesty concerning limitations.



### 3. Theory assumptions and proofs

Question: For each theoretical result, does the paper provide the full set of assumptions and a complete (and correct) proof?

Answer: [Yes]

Justification: Each of our theoretical results is stated with the full set of assumptions, and complete proofs are provided in the appendix. We have made every effort to ensure that the arguments are rigorous and correct to the best of our knowledge.

Guidelines:

- The answer NA means that the paper does not include theoretical results.
- All the theorems, formulas, and proofs in the paper should be numbered and cross-referenced.
- All assumptions should be clearly stated or referenced in the statement of any theorems.
- The proofs can either appear in the main paper or the supplemental material, but if they appear in the supplemental material, the authors are encouraged to provide a short proof sketch to provide intuition.
- Inversely, any informal proof provided in the core of the paper should be complemented by formal proofs provided in appendix or supplemental material.
- Theorems and Lemmas that the proof relies upon should be properly referenced.

### 4. Experimental result reproducibility

Question: Does the paper fully disclose all the information needed to reproduce the main experimental results of the paper to the extent that it affects the main claims and/or conclusions of the paper (regardless of whether the code and data are provided or not)?

Answer: [Yes]

Justification: We have made every effort to fully disclose all information necessary to reproduce the main experimental results. Section 6 and Appendix H provide detailed descriptions of the experimental setup, and all code required to run the experiments is included as supplementary material.

Guidelines:

- The answer NA means that the paper does not include experiments.
- If the paper includes experiments, a No answer to this question will not be perceived well by the reviewers: Making the paper reproducible is important, regardless of whether the code and data are provided or not.
- If the contribution is a dataset and/or model, the authors should describe the steps taken to make their results reproducible or verifiable.
- Depending on the contribution, reproducibility can be accomplished in various ways. For example, if the contribution is a novel architecture, describing the architecture fully might suffice, or if the contribution is a specific model and empirical evaluation, it may be necessary to either make it possible for others to replicate the model with the same dataset, or provide access to the model. In general, releasing code and data is often one good way to accomplish this, but reproducibility can also be provided via detailed instructions for how to replicate the results, access to a hosted model (e.g., in the case of a large language model), releasing of a model checkpoint, or other means that are appropriate to the research performed.
- While NeurIPS does not require releasing code, the conference does require all submissions to provide some reasonable avenue for reproducibility, which may depend on the nature of the contribution. For example
  - (a) If the contribution is primarily a new algorithm, the paper should make it clear how to reproduce that algorithm.
  - (b) If the contribution is primarily a new model architecture, the paper should describe the architecture clearly and fully.
  - (c) If the contribution is a new model (e.g., a large language model), then there should either be a way to access this model for reproducing the results or a way to reproduce the model (e.g., with an open-source dataset or instructions for how to construct the dataset).



1697 (d) We recognize that reproducibility may be tricky in some cases, in which case  
1698 authors are welcome to describe the particular way they provide for reproducibility.  
1699 In the case of closed-source models, it may be that access to the model is limited in  
1700 some way (e.g., to registered users), but it should be possible for other researchers  
1701 to have some path to reproducing or verifying the results.

## 1702 5. Open access to data and code

1703 Question: Does the paper provide open access to the data and code, with sufficient instruc-  
1704 tions to faithfully reproduce the main experimental results, as described in supplemental  
1705 material?

1706 Answer: [Yes]

1707 Justification: We provide all code as supplementary material to ensure reproducibility. Full  
1708 descriptions of the experimental setup are included in Section 6 and Appendix H, to the best  
1709 of our ability, to allow faithful reproduction of the main results.

1710 Guidelines:

- 1711 • The answer NA means that paper does not include experiments requiring code.
- 1712 • Please see the NeurIPS code and data submission guidelines ([https://nips.cc/](https://nips.cc/public/guides/CodeSubmissionPolicy)  
1713 [public/guides/CodeSubmissionPolicy](https://nips.cc/public/guides/CodeSubmissionPolicy)) for more details.
- 1714 • While we encourage the release of code and data, we understand that this might not be  
1715 possible, so “No” is an acceptable answer. Papers cannot be rejected simply for not  
1716 including code, unless this is central to the contribution (e.g., for a new open-source  
1717 benchmark).
- 1718 • The instructions should contain the exact command and environment needed to run to  
1719 reproduce the results. See the NeurIPS code and data submission guidelines ([https://](https://nips.cc/public/guides/CodeSubmissionPolicy)  
1720 [nips.cc/public/guides/CodeSubmissionPolicy](https://nips.cc/public/guides/CodeSubmissionPolicy)) for more details.
- 1721 • The authors should provide instructions on data access and preparation, including how  
1722 to access the raw data, preprocessed data, intermediate data, and generated data, etc.
- 1723 • The authors should provide scripts to reproduce all experimental results for the new  
1724 proposed method and baselines. If only a subset of experiments are reproducible, they  
1725 should state which ones are omitted from the script and why.
- 1726 • At submission time, to preserve anonymity, the authors should release anonymized  
1727 versions (if applicable).
- 1728 • Providing as much information as possible in supplemental material (appended to the  
1729 paper) is recommended, but including URLs to data and code is permitted.

## 1730 6. Experimental setting/details

1731 Question: Does the paper specify all the training and test details (e.g., data splits, hyper-  
1732 parameters, how they were chosen, type of optimizer, etc.) necessary to understand the  
1733 results?

1734 Answer: [Yes]

1735 Justification: All relevant training and evaluation details are described in Section 6 and  
1736 Appendix H. In addition, we provide the full code as supplementary material, which includes  
1737 all configuration files and scripts needed to reproduce the results.

1738 Guidelines:

- 1739 • The answer NA means that the paper does not include experiments.
- 1740 • The experimental setting should be presented in the core of the paper to a level of detail  
1741 that is necessary to appreciate the results and make sense of them.
- 1742 • The full details can be provided either with the code, in appendix, or as supplemental  
1743 material.

## 1744 7. Experiment statistical significance

1745 Question: Does the paper report error bars suitably and correctly defined or other appropriate  
1746 information about the statistical significance of the experiments?

1747 Answer: [Yes]

Justification: All plots involving stochastic components include standard deviation shading to indicate variability. We also clearly state in the text the number of random seeds and the amount of data over which results were averaged.

Guidelines:

- The answer NA means that the paper does not include experiments.
- The authors should answer "Yes" if the results are accompanied by error bars, confidence intervals, or statistical significance tests, at least for the experiments that support the main claims of the paper.
- The factors of variability that the error bars are capturing should be clearly stated (for example, train/test split, initialization, random drawing of some parameter, or overall run with given experimental conditions).
- The method for calculating the error bars should be explained (closed form formula, call to a library function, bootstrap, etc.)
- The assumptions made should be given (e.g., Normally distributed errors).
- It should be clear whether the error bar is the standard deviation or the standard error of the mean.
- It is OK to report 1-sigma error bars, but one should state it. The authors should preferably report a 2-sigma error bar than state that they have a 96% CI, if the hypothesis of Normality of errors is not verified.
- For asymmetric distributions, the authors should be careful not to show in tables or figures symmetric error bars that would yield results that are out of range (e.g. negative error rates).
- If error bars are reported in tables or plots, The authors should explain in the text how they were calculated and reference the corresponding figures or tables in the text.

## 8. Experiments compute resources

Question: For each experiment, does the paper provide sufficient information on the computer resources (type of compute workers, memory, time of execution) needed to reproduce the experiments?

Answer: [Yes]

Justification: We provide detailed information about the computational resources used for our experiments, including hardware specifications, memory, and runtime, in Appendix H to ensure reproducibility.

Guidelines:

- The answer NA means that the paper does not include experiments.
- The paper should indicate the type of compute workers CPU or GPU, internal cluster, or cloud provider, including relevant memory and storage.
- The paper should provide the amount of compute required for each of the individual experimental runs as well as estimate the total compute.
- The paper should disclose whether the full research project required more compute than the experiments reported in the paper (e.g., preliminary or failed experiments that didn't make it into the paper).

## 9. Code of ethics

Question: Does the research conducted in the paper conform, in every respect, with the NeurIPS Code of Ethics <https://neurips.cc/public/EthicsGuidelines>?

Answer: [Yes]

Justification: To the best of our knowledge, the research presented in the paper fully conforms to the NeurIPS Code of Ethics.

Guidelines:

- The answer NA means that the authors have not reviewed the NeurIPS Code of Ethics.
- If the authors answer No, they should explain the special circumstances that require a deviation from the Code of Ethics.

- 1799                   • The authors should make sure to preserve anonymity (e.g., if there is a special consid-  
1800                   eration due to laws or regulations in their jurisdiction).

1801       **10. Broader impacts**

1802       Question: Does the paper discuss both potential positive societal impacts and negative  
1803       societal impacts of the work performed?

1804       Answer: [NA]

1805       Justification:

1806       Guidelines:

- 1807                   • The answer NA means that there is no societal impact of the work performed.
- 1808                   • If the authors answer NA or No, they should explain why their work has no societal  
1809                   impact or why the paper does not address societal impact.
- 1810                   • Examples of negative societal impacts include potential malicious or unintended uses  
1811                   (e.g., disinformation, generating fake profiles, surveillance), fairness considerations  
1812                   (e.g., deployment of technologies that could make decisions that unfairly impact specific  
1813                   groups), privacy considerations, and security considerations.
- 1814                   • The conference expects that many papers will be foundational research and not tied  
1815                   to particular applications, let alone deployments. However, if there is a direct path to  
1816                   any negative applications, the authors should point it out. For example, it is legitimate  
1817                   to point out that an improvement in the quality of generative models could be used to  
1818                   generate deepfakes for disinformation. On the other hand, it is not needed to point out  
1819                   that a generic algorithm for optimizing neural networks could enable people to train  
1820                   models that generate Deepfakes faster.
- 1821                   • The authors should consider possible harms that could arise when the technology is  
1822                   being used as intended and functioning correctly, harms that could arise when the  
1823                   technology is being used as intended but gives incorrect results, and harms following  
1824                   from (intentional or unintentional) misuse of the technology.
- 1825                   • If there are negative societal impacts, the authors could also discuss possible mitigation  
1826                   strategies (e.g., gated release of models, providing defenses in addition to attacks,  
1827                   mechanisms for monitoring misuse, mechanisms to monitor how a system learns from  
1828                   feedback over time, improving the efficiency and accessibility of ML).

1829       **11. Safeguards**

1830       Question: Does the paper describe safeguards that have been put in place for responsible  
1831       release of data or models that have a high risk for misuse (e.g., pretrained language models,  
1832       image generators, or scraped datasets)?

1833       Answer: [NA]

1834       Justification:

1835       Guidelines:

- 1836                   • The answer NA means that the paper poses no such risks.
- 1837                   • Released models that have a high risk for misuse or dual-use should be released with  
1838                   necessary safeguards to allow for controlled use of the model, for example by requiring  
1839                   that users adhere to usage guidelines or restrictions to access the model or implementing  
1840                   safety filters.
- 1841                   • Datasets that have been scraped from the Internet could pose safety risks. The authors  
1842                   should describe how they avoided releasing unsafe images.
- 1843                   • We recognize that providing effective safeguards is challenging, and many papers do  
1844                   not require this, but we encourage authors to take this into account and make a best  
1845                   faith effort.

1846       **12. Licenses for existing assets**

1847       Question: Are the creators or original owners of assets (e.g., code, data, models), used in  
1848       the paper, properly credited and are the license and terms of use explicitly mentioned and  
1849       properly respected?

1850       Answer: [NA]

Justification:

Guidelines:

- The answer NA means that the paper does not use existing assets.
- The authors should cite the original paper that produced the code package or dataset.
- The authors should state which version of the asset is used and, if possible, include a URL.
- The name of the license (e.g., CC-BY 4.0) should be included for each asset.
- For scraped data from a particular source (e.g., website), the copyright and terms of service of that source should be provided.
- If assets are released, the license, copyright information, and terms of use in the package should be provided. For popular datasets, [paperswithcode.com/datasets](https://paperswithcode.com/datasets) has curated licenses for some datasets. Their licensing guide can help determine the license of a dataset.
- For existing datasets that are re-packaged, both the original license and the license of the derived asset (if it has changed) should be provided.
- If this information is not available online, the authors are encouraged to reach out to the asset's creators.

### 13. New assets

Question: Are new assets introduced in the paper well documented and is the documentation provided alongside the assets?

Answer: [NA]

Justification:

Guidelines:

- The answer NA means that the paper does not release new assets.
- Researchers should communicate the details of the dataset/code/model as part of their submissions via structured templates. This includes details about training, license, limitations, etc.
- The paper should discuss whether and how consent was obtained from people whose asset is used.
- At submission time, remember to anonymize your assets (if applicable). You can either create an anonymized URL or include an anonymized zip file.

### 14. Crowdsourcing and research with human subjects

Question: For crowdsourcing experiments and research with human subjects, does the paper include the full text of instructions given to participants and screenshots, if applicable, as well as details about compensation (if any)?

Answer: [NA]

Justification:

Guidelines:

- The answer NA means that the paper does not involve crowdsourcing nor research with human subjects.
- Including this information in the supplemental material is fine, but if the main contribution of the paper involves human subjects, then as much detail as possible should be included in the main paper.
- According to the NeurIPS Code of Ethics, workers involved in data collection, curation, or other labor should be paid at least the minimum wage in the country of the data collector.

### 15. Institutional review board (IRB) approvals or equivalent for research with human subjects

Question: Does the paper describe potential risks incurred by study participants, whether such risks were disclosed to the subjects, and whether Institutional Review Board (IRB) approvals (or an equivalent approval/review based on the requirements of your country or institution) were obtained?

1903 Answer: [NA]  
 1904 Justification:  
 1905 Guidelines:  
 1906 • The answer NA means that the paper does not involve crowdsourcing nor research with  
 1907 human subjects.  
 1908 • Depending on the country in which research is conducted, IRB approval (or equivalent)  
 1909 may be required for any human subjects research. If you obtained IRB approval, you  
 1910 should clearly state this in the paper.  
 1911 • We recognize that the procedures for this may vary significantly between institutions  
 1912 and locations, and we expect authors to adhere to the NeurIPS Code of Ethics and the  
 1913 guidelines for their institution.  
 1914 • For initial submissions, do not include any information that would break anonymity (if  
 1915 applicable), such as the institution conducting the review.  
 1916 **16. Declaration of LLM usage**  
 1917 Question: Does the paper describe the usage of LLMs if it is an important, original, or  
 1918 non-standard component of the core methods in this research? Note that if the LLM is used  
 1919 only for writing, editing, or formatting purposes and does not impact the core methodology,  
 1920 scientific rigorousness, or originality of the research, declaration is not required.  
 1921 Answer: [NA]  
 1922 Justification:  
 1923 Guidelines:  
 1924 • The answer NA means that the core method development in this research does not  
 1925 involve LLMs as any important, original, or non-standard components.  
 1926 • Please refer to our LLM policy (<https://neurips.cc/Conferences/2025/LLM>)  
 1927 for what should or should not be described.
